# Supplementary material for: The Use of Low-Density SNP Array for Identification of Interspecific Introgressions of Genetic Material from the Bread Wheat into Homologous Chromosomes of the Durum Wheat
Source: Preprints.org preprint supplement (doi:10.20944/preprints202212.0081.v1), 2022-12-05

Chromosome 1A

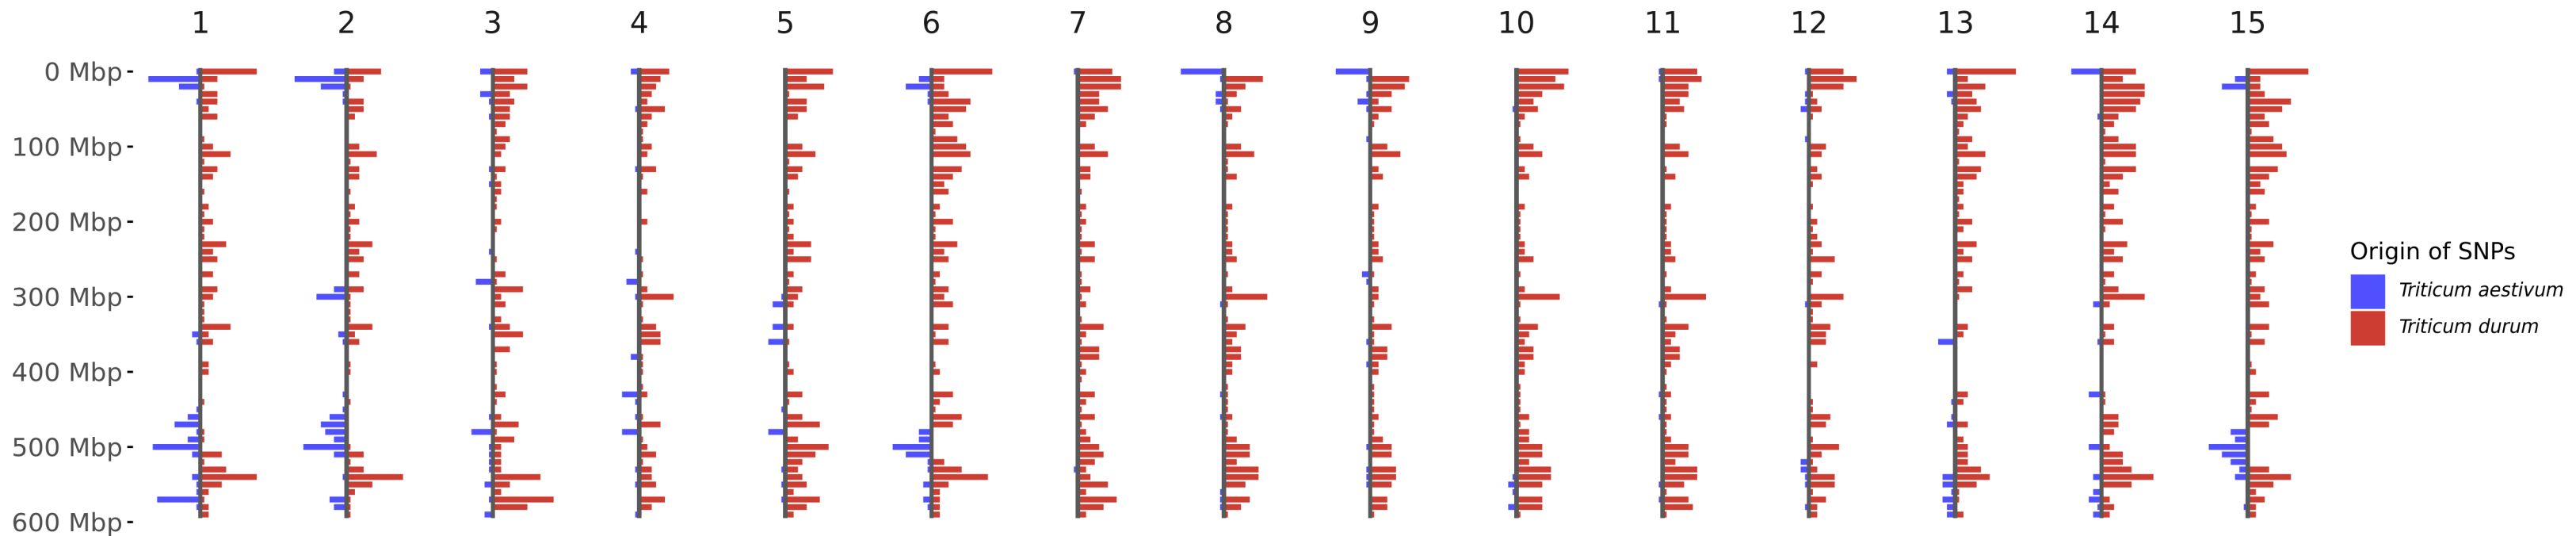

Chromosome 1B

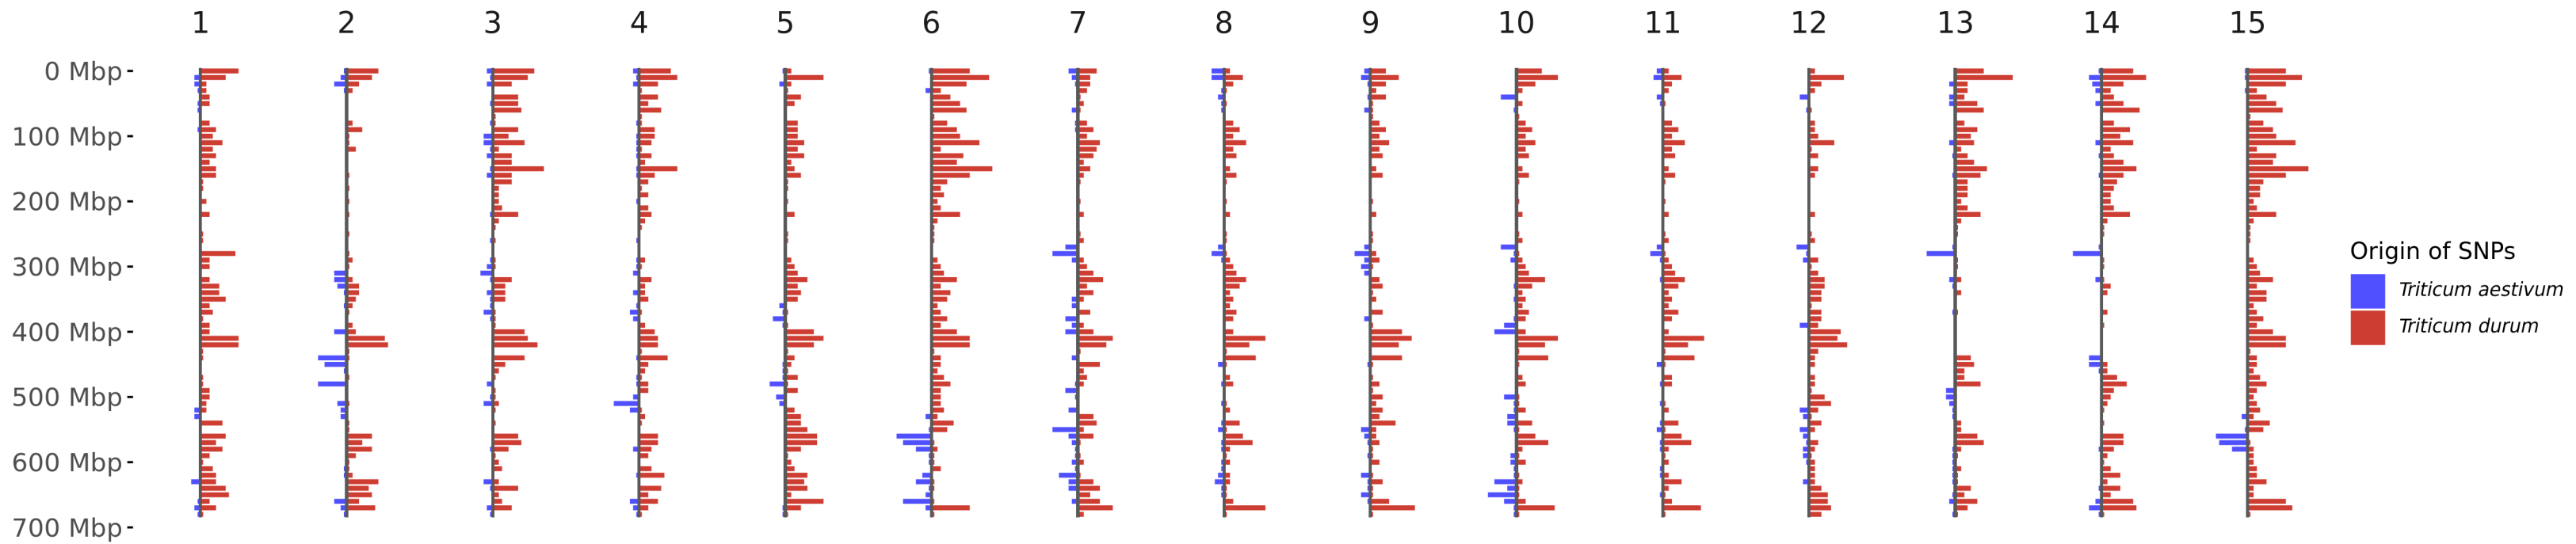

## Chromosome 2A

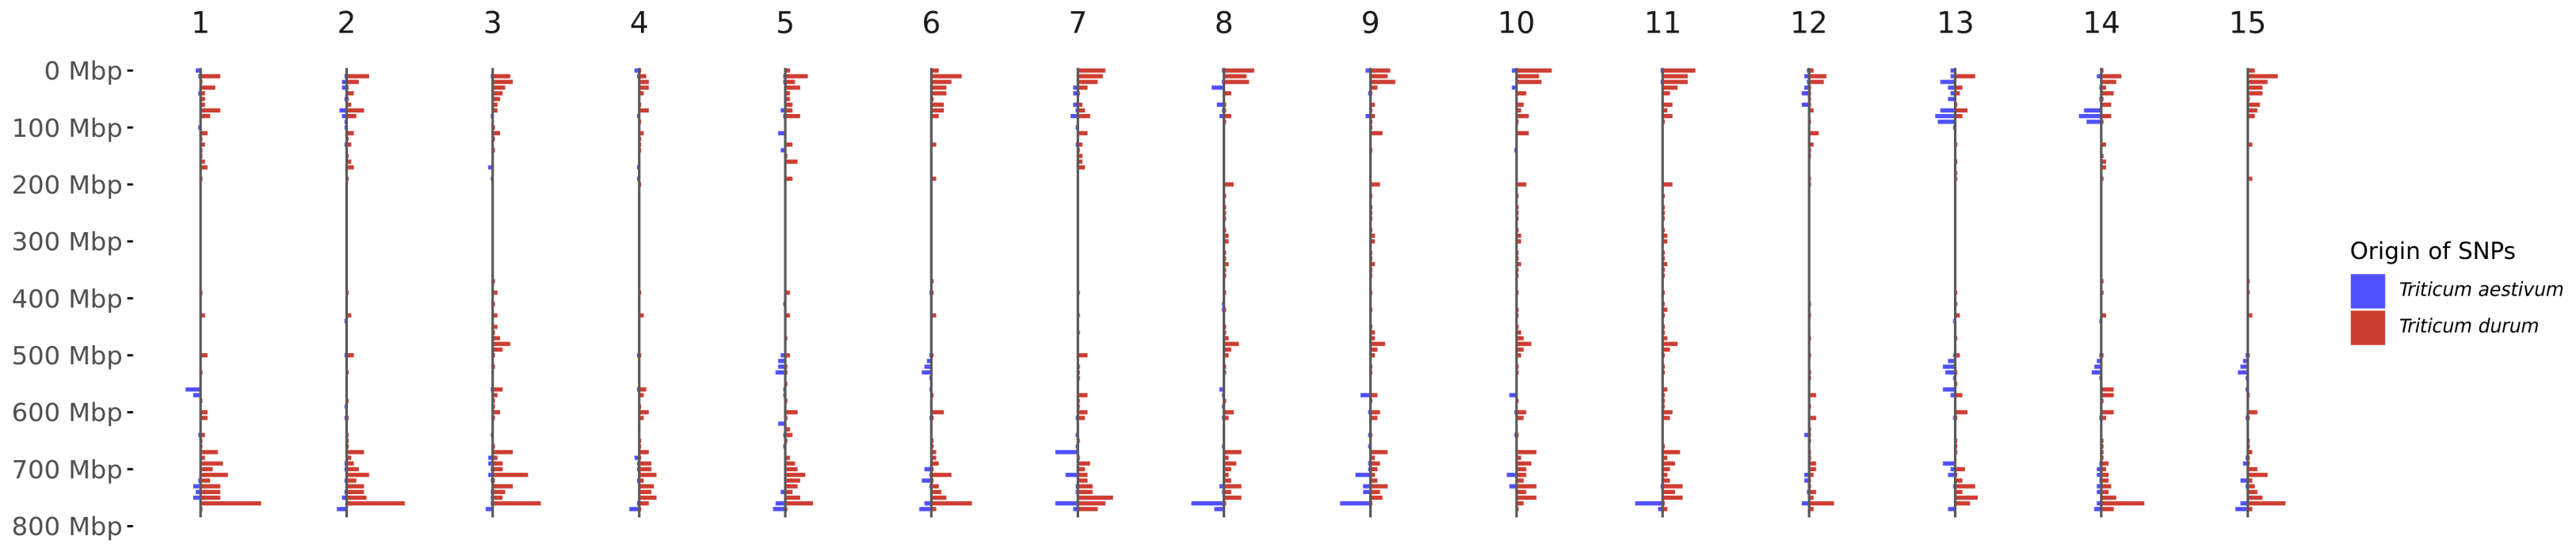

# Chromosome 2B

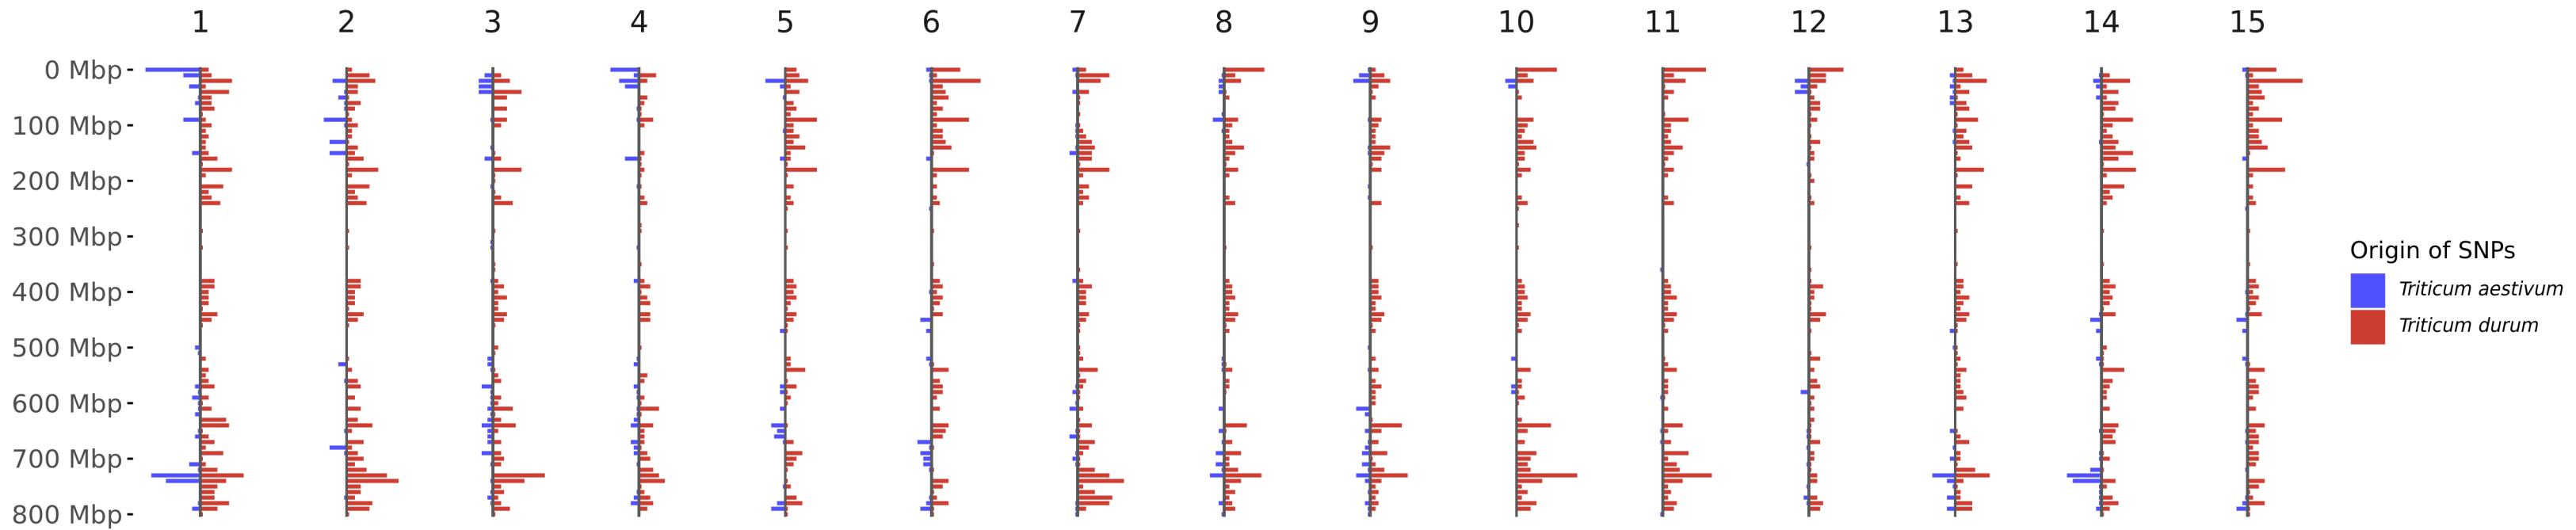

# Chromosome 3A

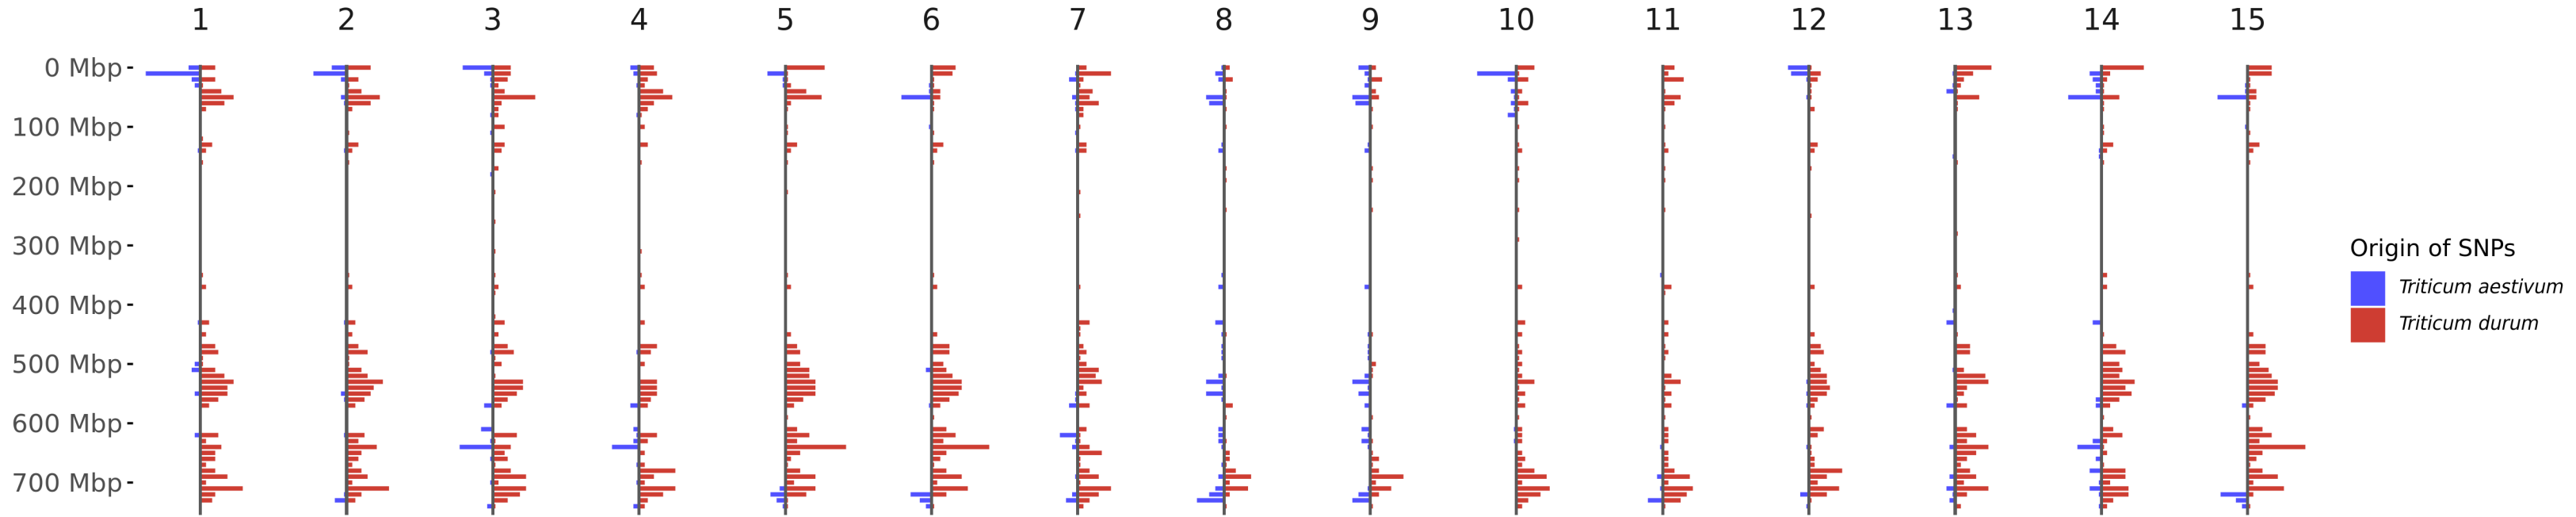

Chromosome 3B

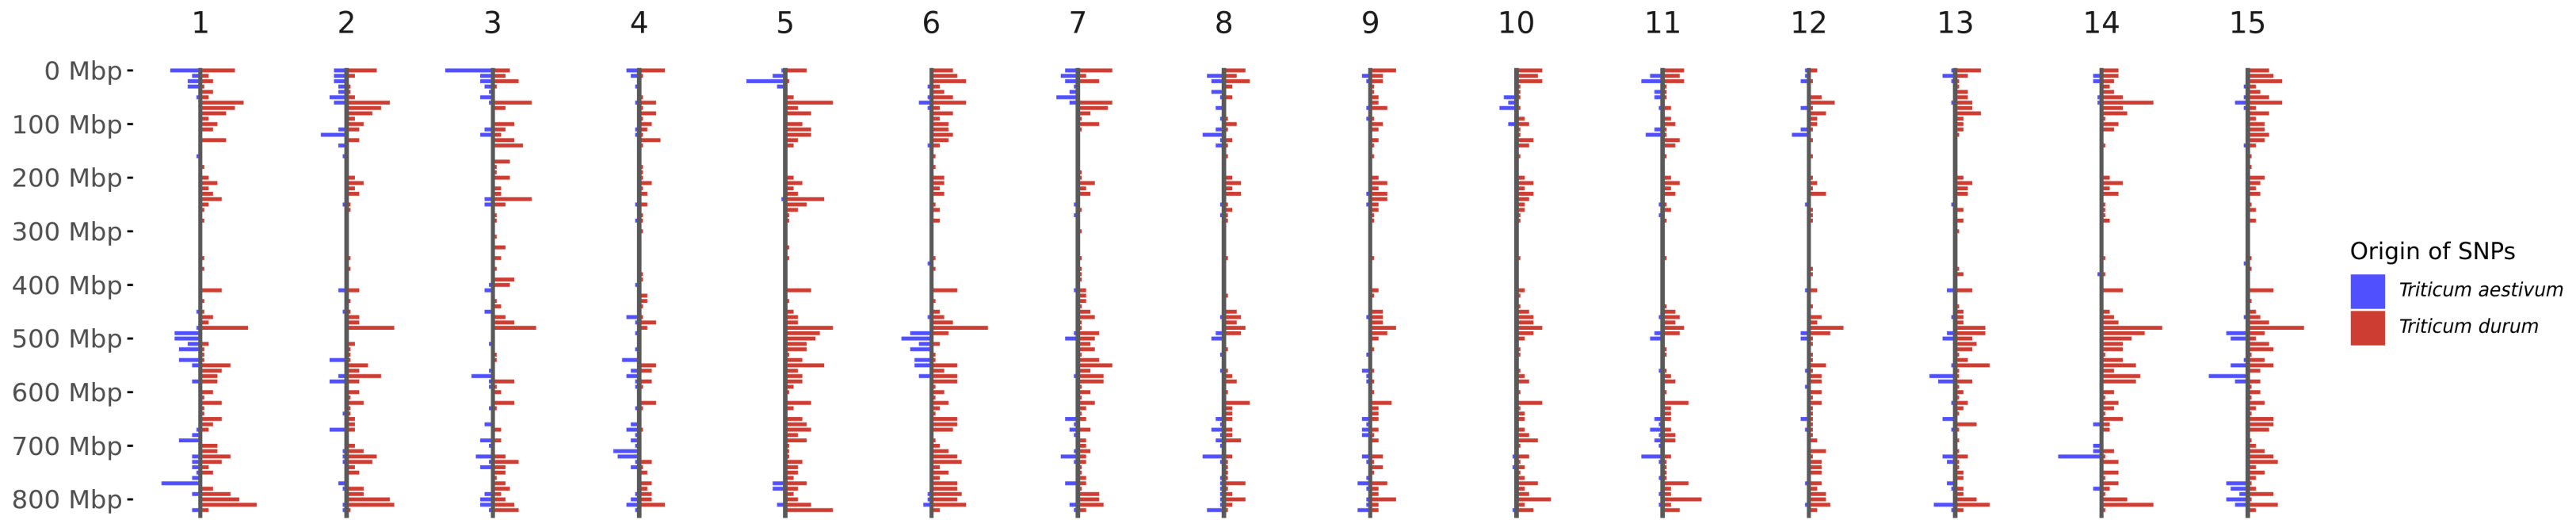

Chromosome 4A

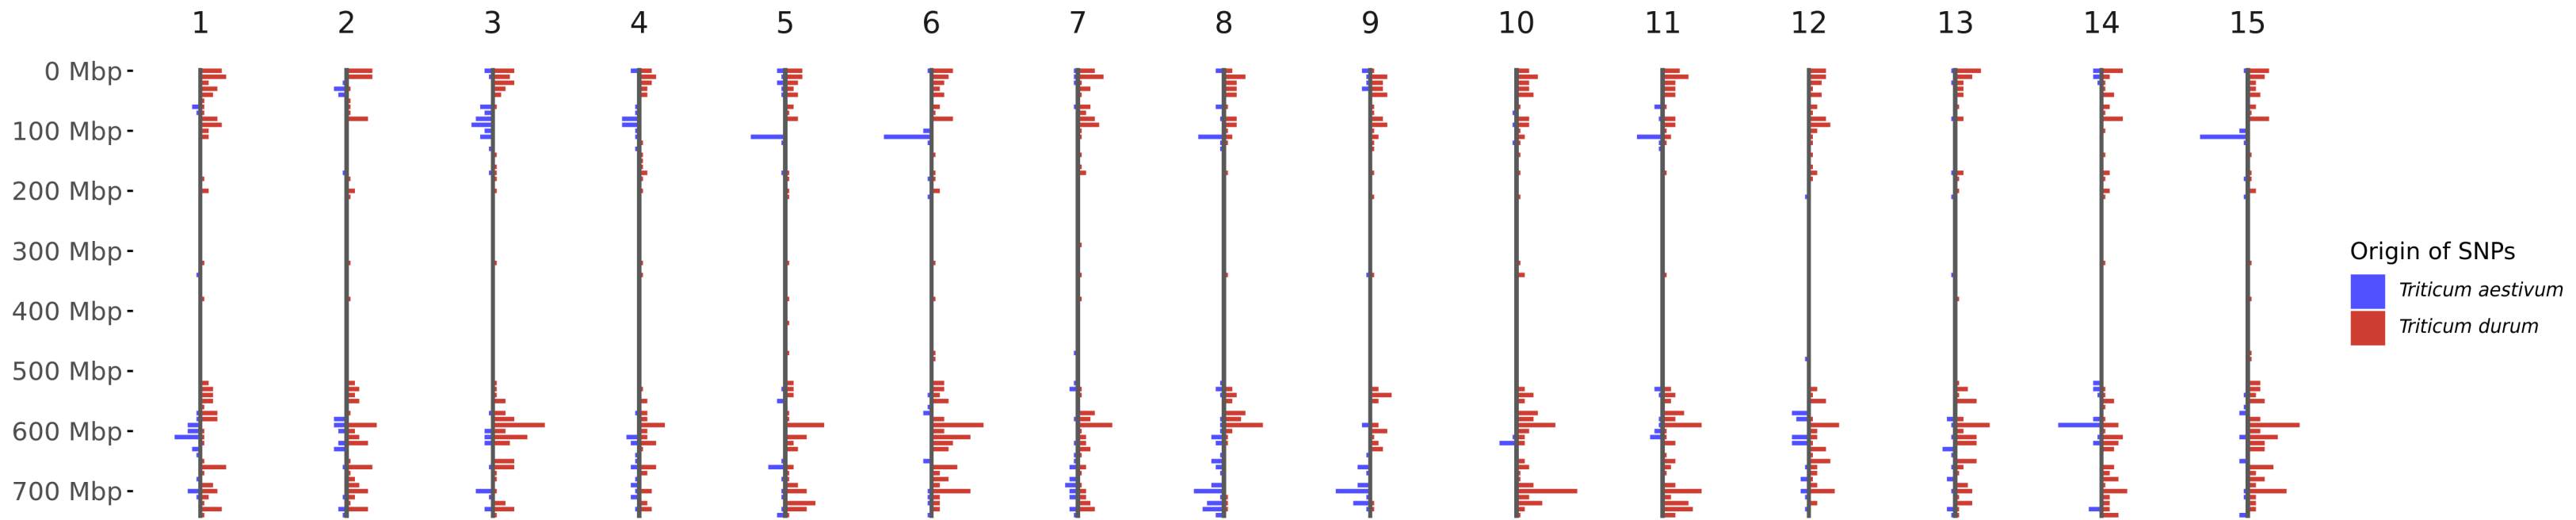

Chromosome 4B

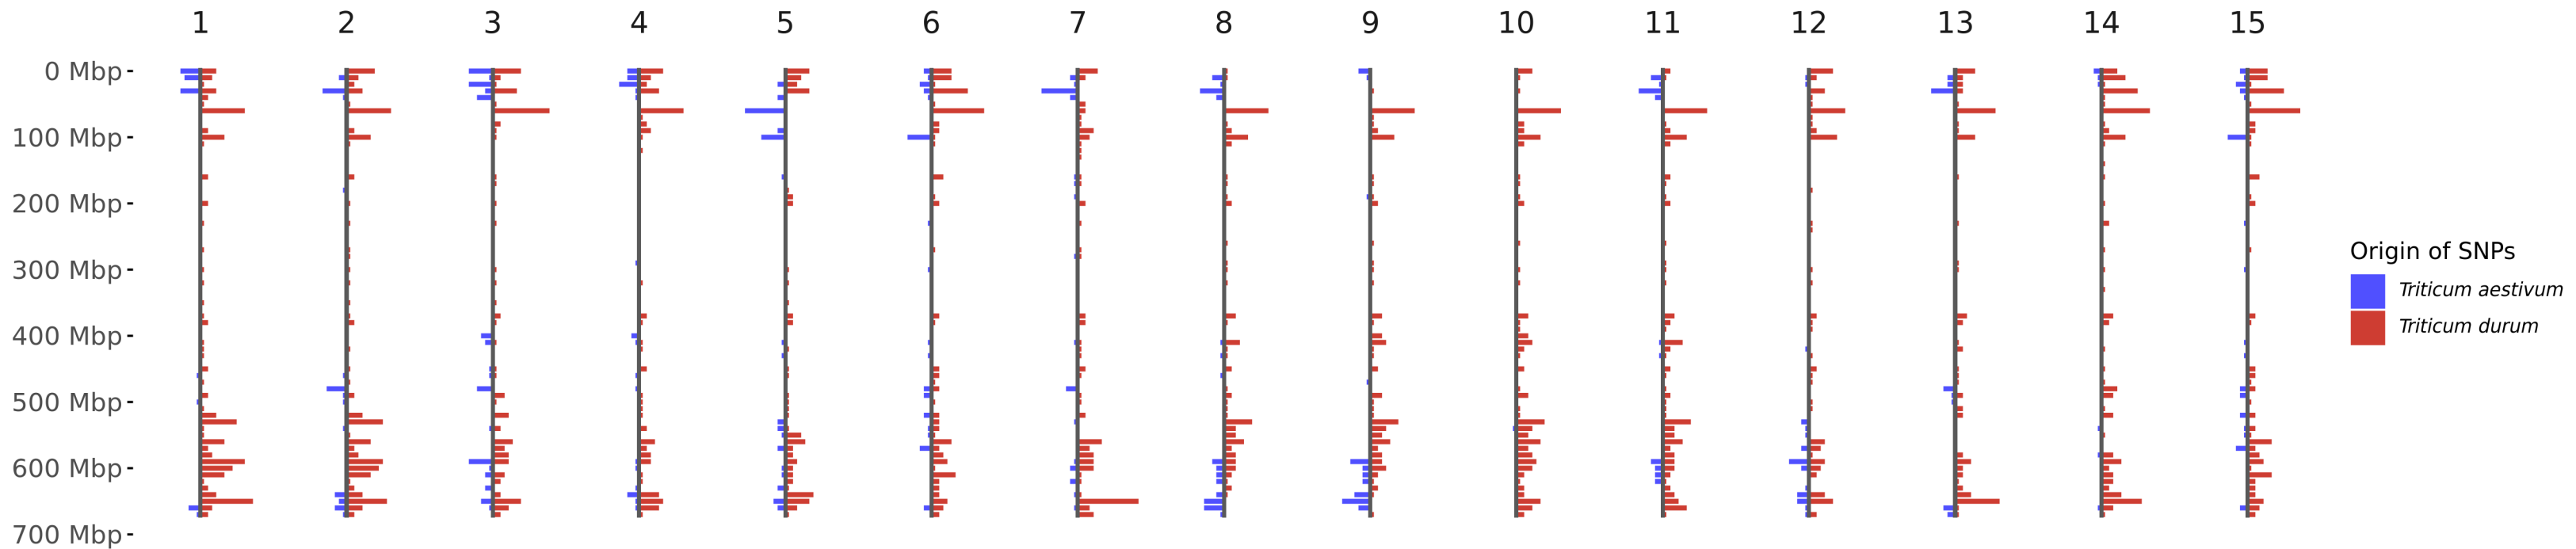



Chromosome 5A

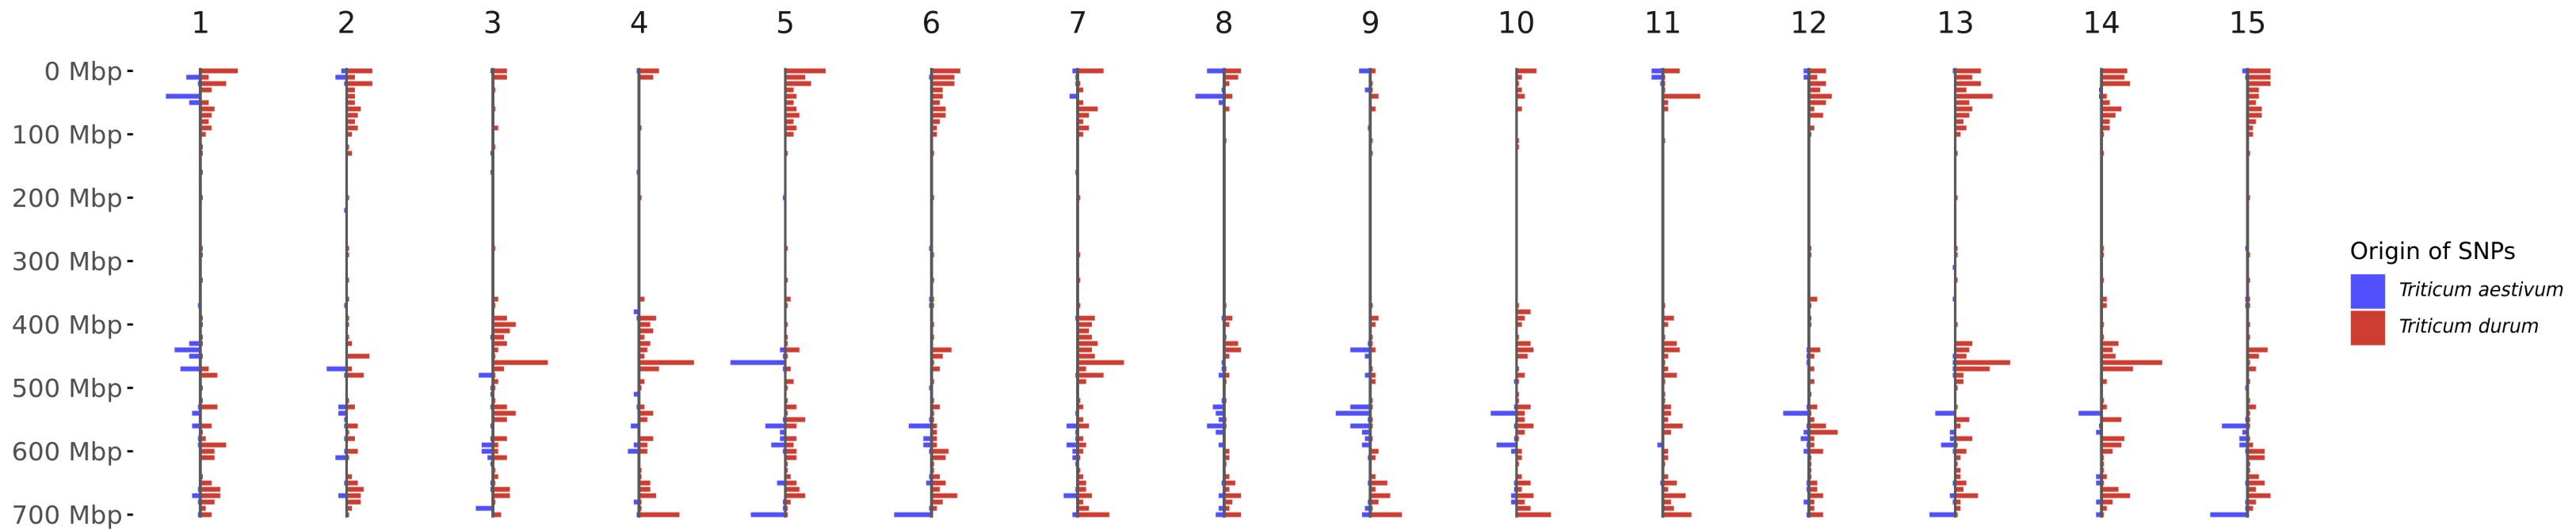

Chromosome 5B

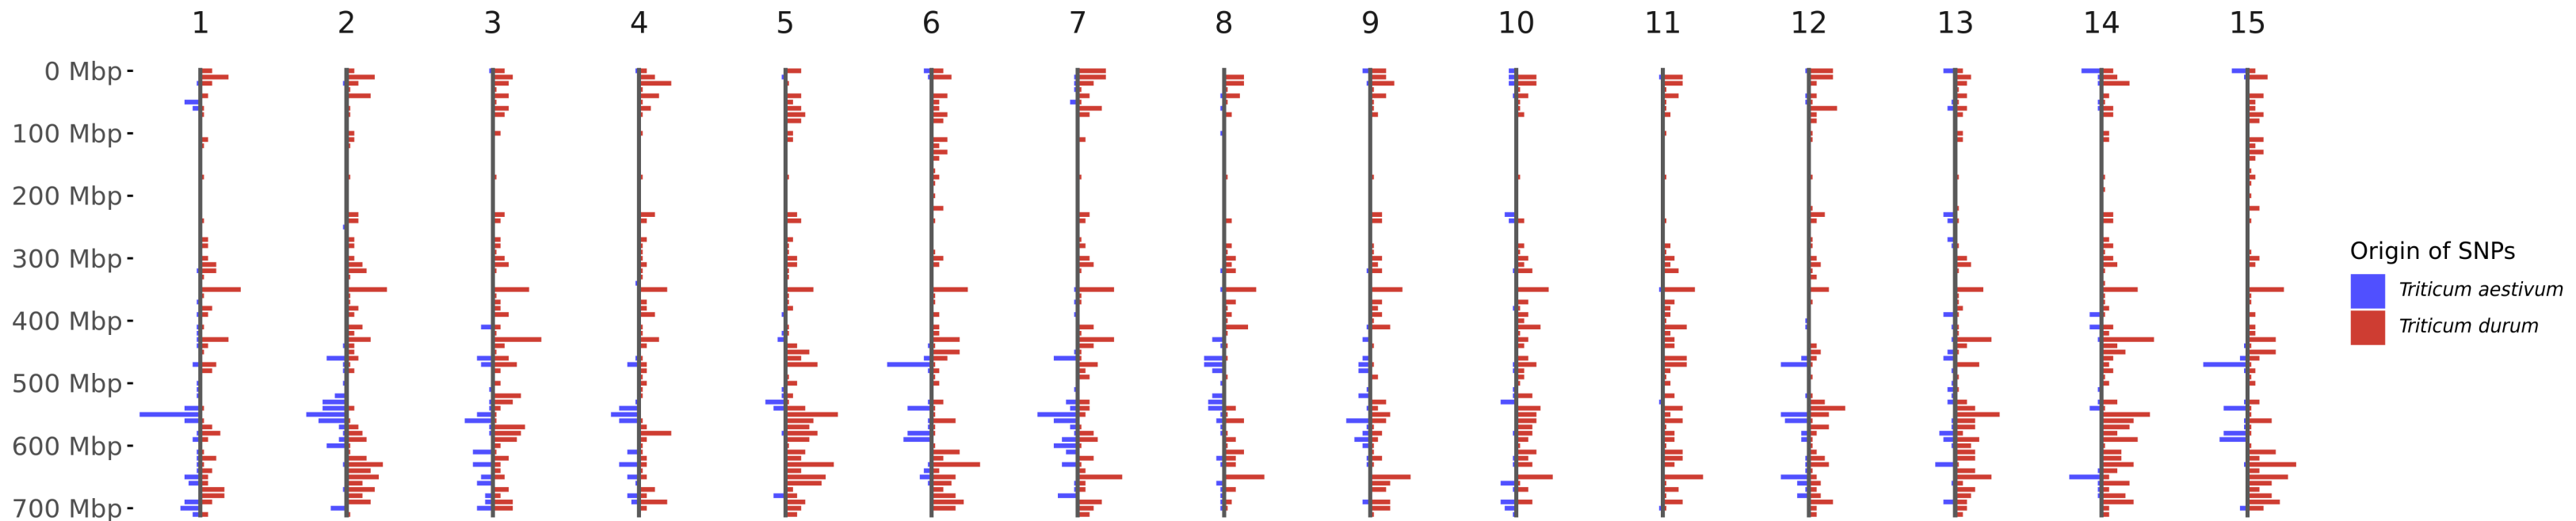

Chromosome 6A

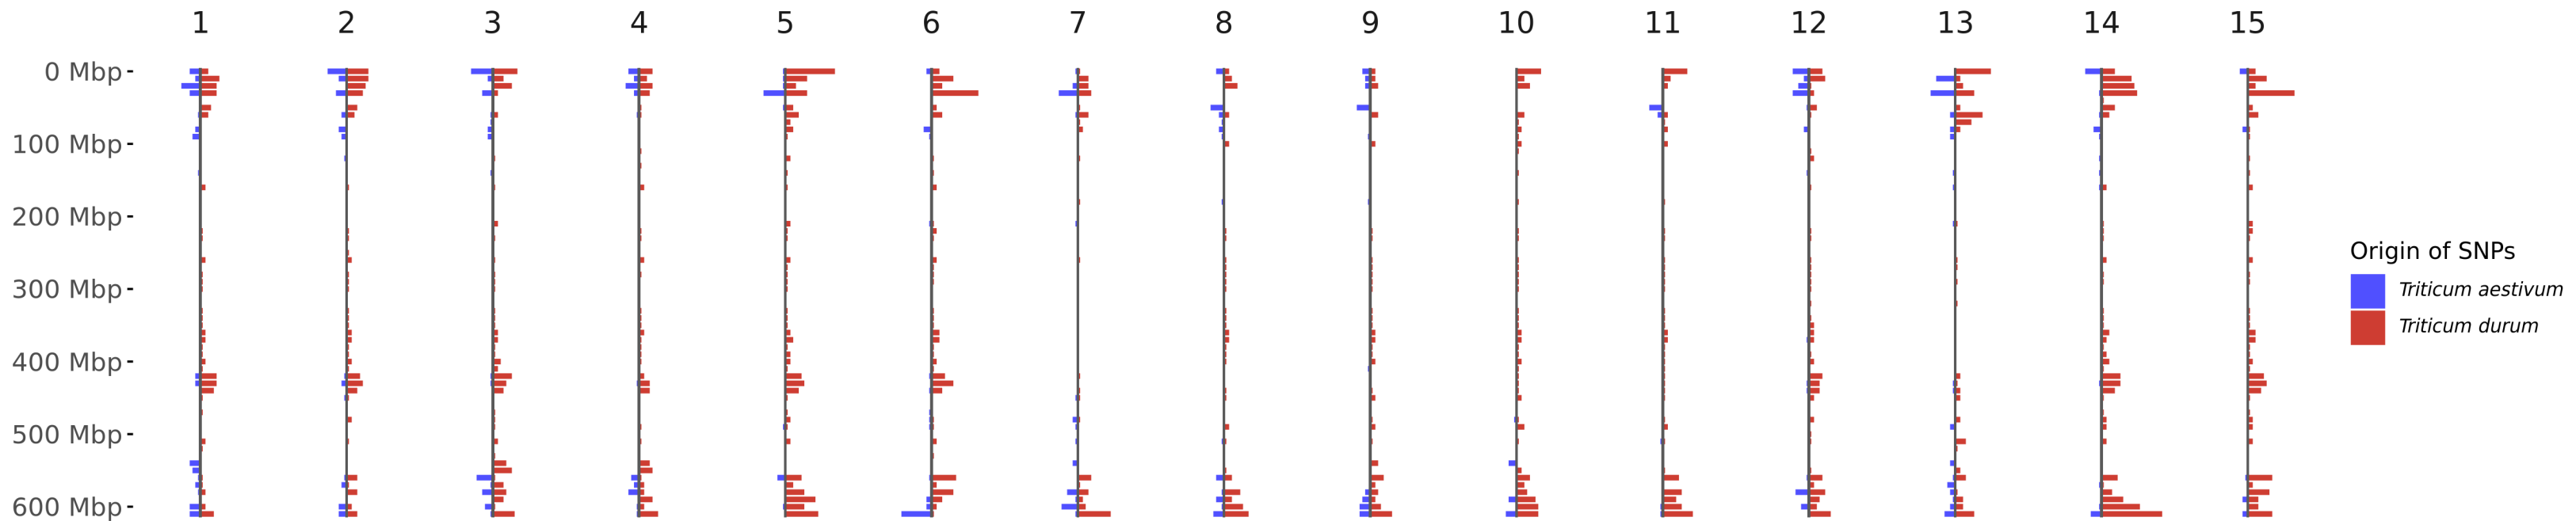

# Chromosome 6B

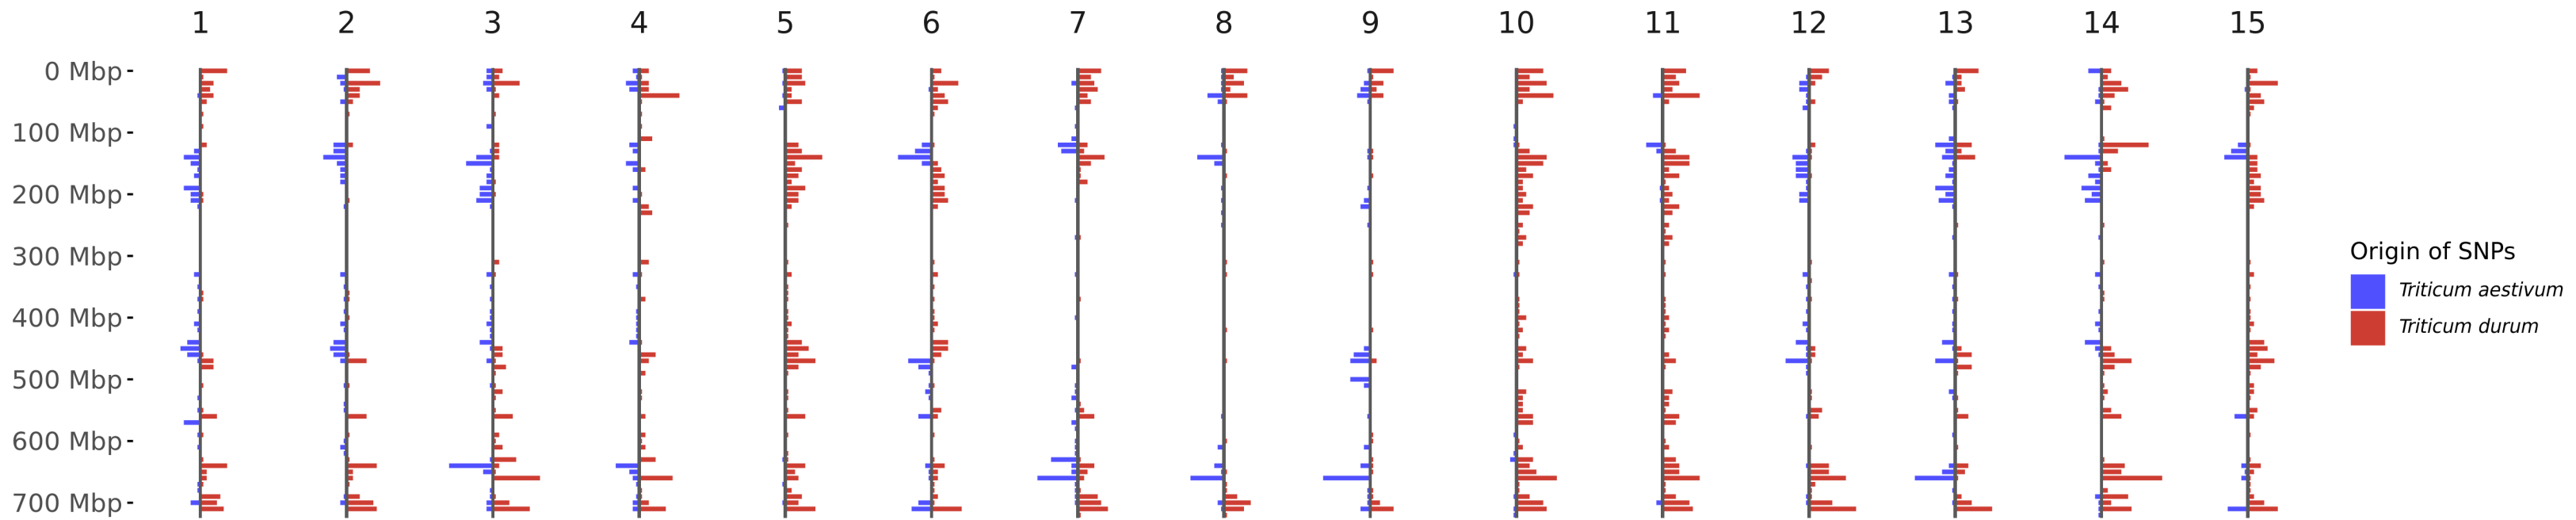

Chromosome 7A

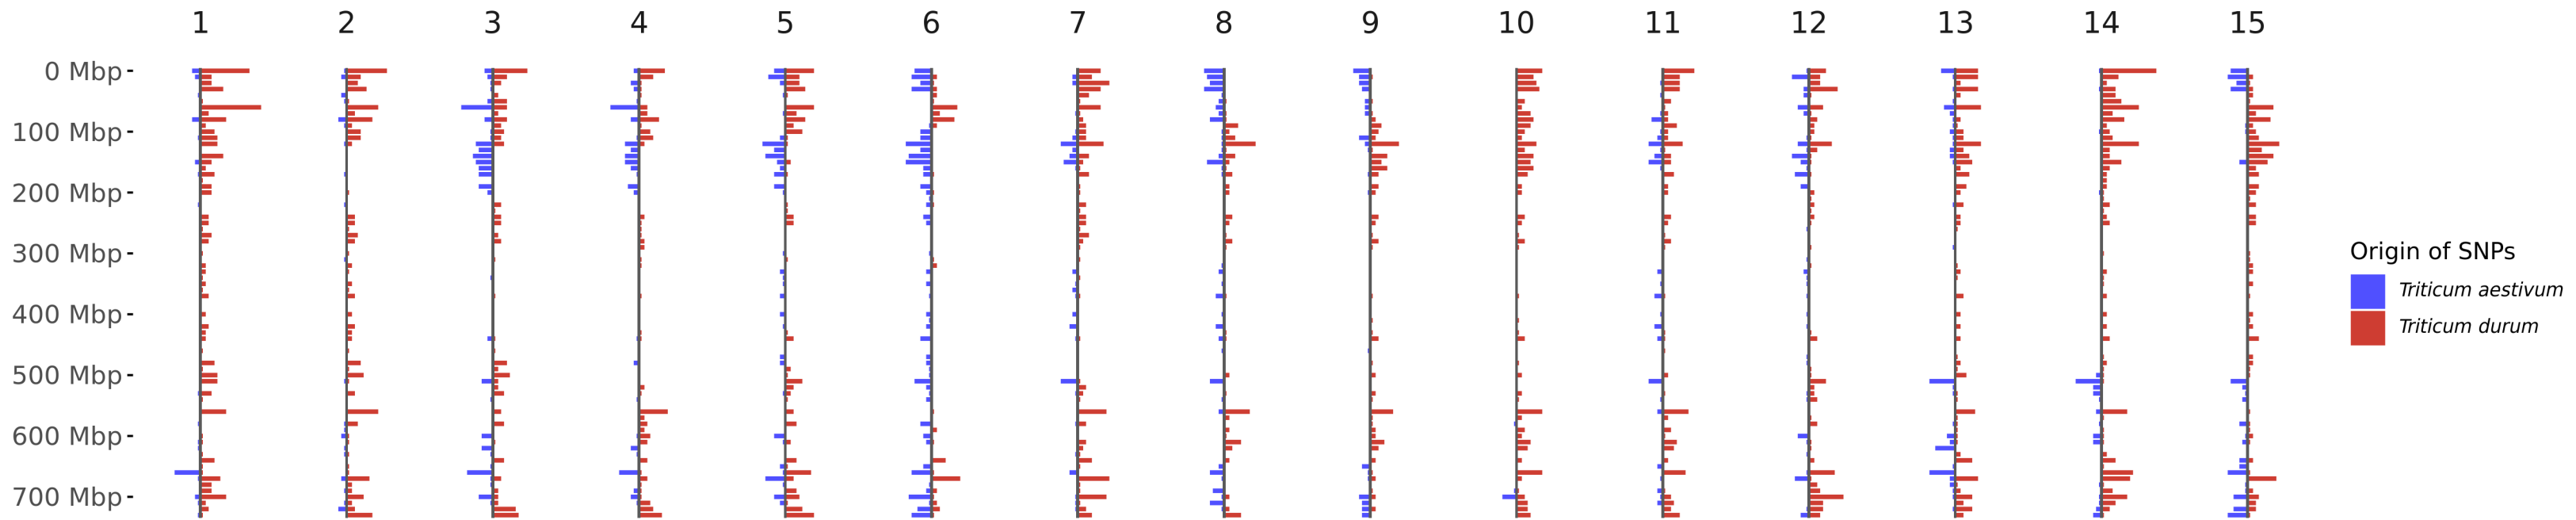

Chromosome 7B

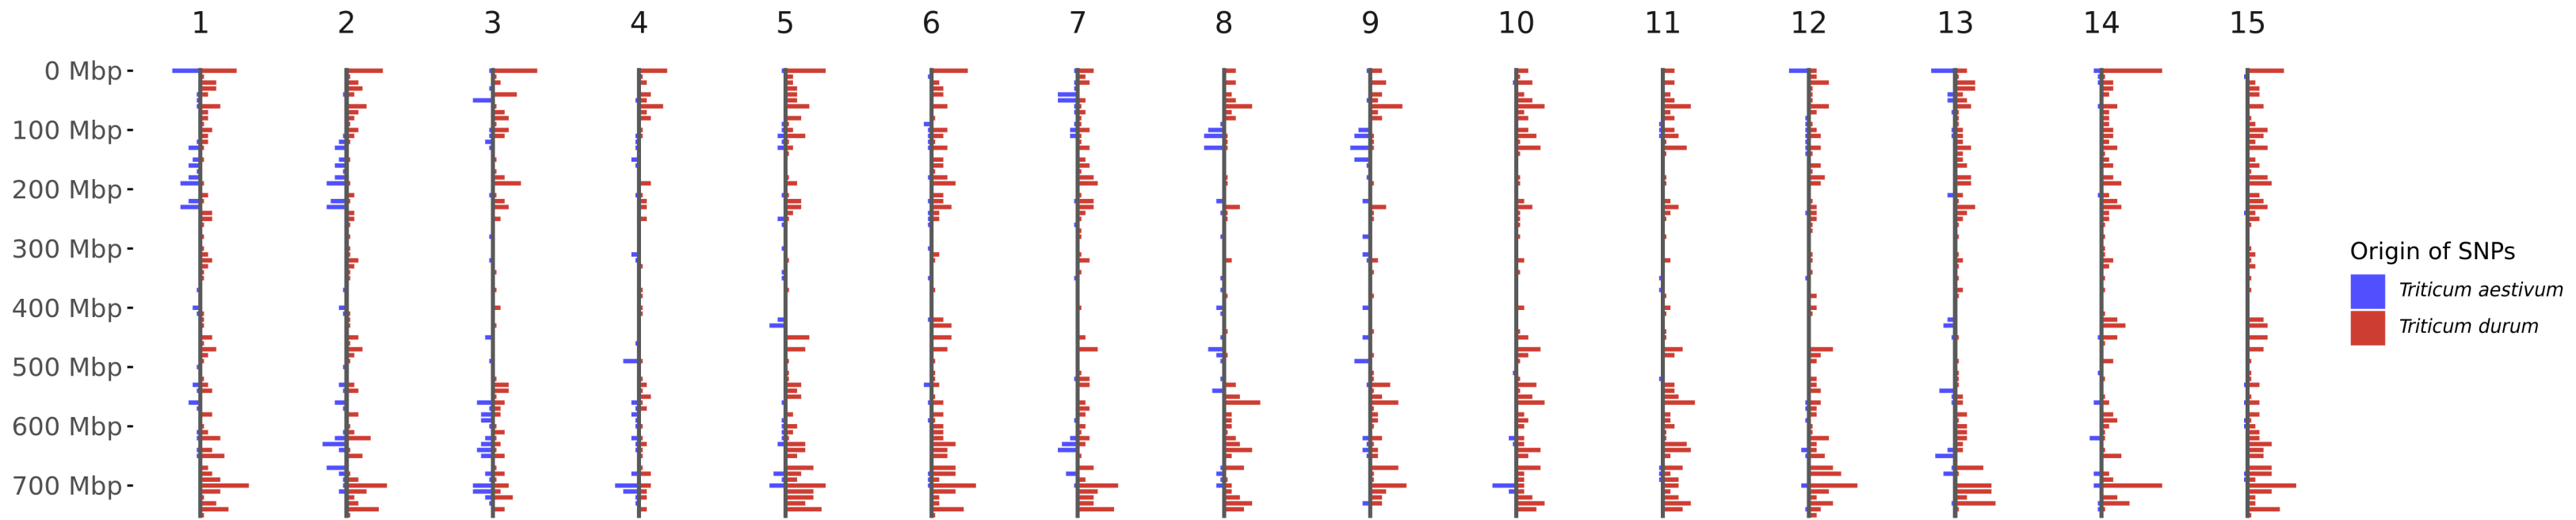

Supplement: Supplementary file 1 [file supplementary]
