# Supplementary material for: The Use of Low-Density SNP Array for Identification of Interspecific Introgressions of Genetic Material from the Bread Wheat into Homologous Chromosomes of the Durum Wheat
Source: Preprints.org preprint supplement (doi:10.20944/preprints202212.0081.v1), 2022-12-05
Supplement: Supplementary file 1 [file supplementary]

## Sheet: 1
Chromosome	Start	End	Gene ID	Gene name
4A	580288521	580301691	TraesCS4A01G267800	Kinase, putative
4A	580302974	580304107	TraesCS4A01G267900	DNA-directed RNA polymerase subunit
4A	580477666	580478491	TraesCS4A01G268000	Histone H1, putative
4A	580485261	580490042	TraesCS4A01G268100	Coatomer subunit alpha
4A	580654977	580661304	TraesCS4A01G268200	Protein kinase
4A	580707381	580729754	TraesCS4A01G268300	Phosphatidylinositol 4-kinase
4A	580730452	580731116	TraesCS4A01G268400	V-type proton ATPase subunit D
4A	580734487	580735937	TraesCS4A01G268500	CONSTANS-like zinc finger protein
4A	580895092	580903002	TraesCS4A01G268600	Protein CASP
4A	580906525	580908057	TraesCS4A01G268700	14-3-3 protein
4A	581142969	581144505	TraesCS4A01G268800	Accelerated cell death 11
4A	581148192	581149603	TraesCS4A01G268900	AT-rich interactive domain protein
4A	581150955	581151197	TraesCS4A01G269000	Acetyl-coenzyme A carboxylase carboxyl transferase subunit alpha
4A	581191895	581195807	TraesCS4A01G269100	Protein kinase-like protein
4A	581196871	581204088	TraesCS4A01G269200	Homologous-pairing protein 2-like protein
4A	581200222	581201286	TraesCS4A01G269300	Regulator of Vps4 activity in the MVB pathway protein, putative
4A	581270007	581270784	TraesCS4A01G269400	Basic blue protein
4A	581274002	581275039	TraesCS4A01G269500	Basic blue protein
4A	581278184	581279746	TraesCS4A01G269600	Microsomal glutathione S-transferase 3
4A	581324889	581326814	TraesCS4A01G269700	Microsomal glutathione S-transferase 3
4A	581329766	581330881	TraesCS4A01G269800	Microsomal glutathione S-transferase 3
4A	581331452	581336479	TraesCS4A01G269900	Zinc finger protein VAR3, chloroplastic
4A	581455498	581456574	TraesCS4A01G270000	DNA-binding storekeeper protein-related transcriptional regulator
4A	581467493	581471226	TraesCS4A01G270100	Myosin-binding protein 2
4A	581481563	581483746	TraesCS4A01G270200	ATP-dependent RNA helicase
4A	581493890	581494297	TraesCS4A01G270300	60S ribosomal protein L5
4A	581749794	581750715	TraesCS4A01G270400	Peptidylprolyl isomerase
4A	581751238	581754972	TraesCS4A01G270500	3-oxo-5-alpha-steroid 4-dehydrogenase
4A	581759713	581760915	TraesCS4A01G270600	F-box family protein
4A	581867995	581871066	TraesCS4A01G270700	Phytanoyl-CoA dioxygenase family protein
4A	581916832	581917610	TraesCS4A01G270800	Phospholipase A2
4A	581934950	581944657	TraesCS4A01G270900	Glutamyl-tRNA(Gln) amidotransferase subunit A
4A	582477716	582479578	TraesCS4A01G271000	GAI-like protein 1
4A	582507114	582510391	TraesCS4A01G271100	Drug/metabolite transporter
4A	582524342	582534665	TraesCS4A01G271200	Transmembrane fragile-X-F-associated protein
4A	582839931	582840989	TraesCS4A01G271300	Transcription factor TEOSINTE BRANCHED 1
4A	583150186	583155216	TraesCS4A01G271400	RuvB-like helicase
4A	583162282	583163565	TraesCS4A01G271500	Fantastic four-like protein
4A	583419318	583422909	TraesCS4A01G271600	Phosphatidylinositol-4-phosphate 5-kinase, putative
4A	583525525	583534431	TraesCS4A01G271700	Oxysterol-binding protein, putative
4A	583702432	583707366	TraesCS4A01G271800	Kinase family protein
4A	583707903	583717668	TraesCS4A01G271900	Histone-lysine N-methyltransferase
4A	583754800	583757140	TraesCS4A01G272000	Plastid-lipid associated protein PAP / fibrillin family protein
4A	583757696	583759270	TraesCS4A01G272100	30S ribosomal protein S13, putative, expressed
4A	583760272	583763441	TraesCS4A01G272200	SNARE associated Golgi protein family
4A	583867353	583867884	TraesCS4A01G272300	BnaA04g06320D protein
4A	583869145	583869366	TraesCS4A01G272400	50S ribosomal protein L33
4A	583899849	583905113	TraesCS4A01G272500	Protein kinase
4A	583906671	583910180	TraesCS4A01G272600	Mitogen-activated protein kinase kinase kinase 1
4A	583914291	583915891	TraesCS4A01G272700	Zinc finger family protein
4A	583936151	583946383	TraesCS4A01G272800	Beta-glucosidase
4A	583949402	583953409	TraesCS4A01G272900	Beta-glucosidase
4A	583959345	583960583	TraesCS4A01G273000	Ubiquitin-conjugating enzyme E2 B
4A	583969485	583970798	TraesCS4A01G273100	Eukaryotic peptide chain release factor subunit 1-1
4A	583975054	583980304	TraesCS4A01G273200	Nucleotide-sugar transporter family protein
4A	584040603	584042579	TraesCS4A01G273300	Leucine-rich repeat receptor-like protein kinase family protein
4A	584046355	584046963	TraesCS4A01G273400	S-adenosylmethionine decarboxylase proenzyme
4A	584055111	584056903	TraesCS4A01G273500	Glycosyltransferase
4A	584062945	584068329	TraesCS4A01G273600	Protein-protein interaction regulator
4A	584071841	584072942	TraesCS4A01G273700	Cysteine protease, putative
4A	584108425	584112758	TraesCS4A01G273800	Cysteine protease, putative
4A	584111584	584111871	TraesCS4A01G273900	Cysteine protease, putative
4A	584114748	584115922	TraesCS4A01G274000	Cysteine protease, putative
4A	584117906	584119065	TraesCS4A01G274100	Cysteine protease, putative
4A	584119978	584125481	TraesCS4A01G274200	Phosphatidylinositol-4-phosphate 5-kinase family protein
4A	584272892	584276246	TraesCS4A01G274300	Ethylene receptor
4A	584308413	584308760	TraesCS4A01G274400	transmembrane protein, putative (DUF247)
4A	584308844	584313947	TraesCS4A01G274500	transmembrane protein, putative (DUF247)
4A	584346191	584346772	TraesCS4A01G274600	DUF1764 domain-containing protein
4A	584349415	584352161	TraesCS4A01G274700	RING finger protein
4A	584388183	584389166	TraesCS4A01G274900	Elongation of very long chain fatty acids protein 3
4A	584517620	584517790	TraesCS4A01G275000	RING/U-box superfamily protein
4A	584520126	584522528	TraesCS4A01G275100	Pentatricopeptide repeat-containing protein
4A	584523426	584525657	TraesCS4A01G275200	spindle pole body-associated protein
4A	584532753	584535075	TraesCS4A01G275300	Haloacid dehalogenase-like hydrolase
4A	584537677	584539036	TraesCS4A01G275400	Pre-mRNA-splicing factor 18
4A	584543987	584553685	TraesCS4A01G275500	Importin-5
4A	584663429	584669278	TraesCS4A01G275600	Divalent metal cation transporter MntH 2
4A	584672019	584675743	TraesCS4A01G275700	F-box protein
4A	584679839	584680678	TraesCS4A01G275800	Lipoxygenase
4A	584694417	584699590	TraesCS4A01G275900	Lipoxygenase
4A	584735545	584738842	TraesCS4A01G276000	Lipoxygenase
4A	584783153	584785124	TraesCS4A01G276100	Laccase
4A	584797507	584800051	TraesCS4A01G276200	N-acetyltransferase, putative
4A	584810980	584813007	TraesCS4A01G276300	Adenylosuccinate synthetase
4A	584817688	584823187	TraesCS4A01G276400	Pescadillo homolog
4A	584882453	584885501	TraesCS4A01G276500	WD-repeat protein, putative
4A	584931338	584934198	TraesCS4A01G276600	Alkaline ceramidase 3
4A	584936954	584939511	TraesCS4A01G276700	Zinc finger CCCH domain-containing protein
4A	584969965	584973282	TraesCS4A01G276800	Protein yippee-like
4A	585027950	585033320	TraesCS4A01G276900	polyketide cyclase/dehydrase/lipid transport superfamily protein
4A	585054611	585060791	TraesCS4A01G277000	Antimicrobial peptide MBP-1
4A	585094397	585099779	TraesCS4A01G277100	Protein kinase superfamily protein
4A	585209875	585211659	TraesCS4A01G277200	Cytokinin riboside 5'-monophosphate phosphoribohydrolase
4A	585376976	585379886	TraesCS4A01G277300	Nuclear transcription factor Y subunit
4A	585395987	585396268	TraesCS4A01G277400	Ran-binding protein 3
4A	585396723	585400936	TraesCS4A01G277500	Late embryogenesis abundant hydroxyproline-rich glycoprotein
4A	585432085	585444318	TraesCS4A01G277600	Chloride channel protein
4A	585456231	585458315	TraesCS4A01G277700	Proteasome subunit beta type
4A	585459229	585463234	TraesCS4A01G277800	Myelin-associated oligodendrocyte basic protein isoform 1
4A	585539981	585541802	TraesCS4A01G277900	Cytochrome P450 family protein, expressed
4A	585556795	585557127	TraesCS4A01G278000	RING/U-box superfamily protein
4A	585646903	585647766	TraesCS4A01G278100	Leucine-rich repeat receptor-like protein kinase
4A	585687148	585693746	TraesCS4A01G278300	Ankyrin repeat family protein
4A	586431958	586436984	TraesCS4A01G278500	Lysine--tRNA ligase
4A	586437450	586437794	TraesCS4A01G278600	50S ribosomal protein L18
4A	586439529	586442039	TraesCS4A01G278700	30S ribosomal protein S21
4A	586449768	586452785	TraesCS4A01G278800	Nucleobase ascorbate transporter
4A	586501219	586501902	TraesCS4A01G278900	Germin-like protein 1-1
4A	586674210	586678377	TraesCS4A01G279000	Ankyrin-repeat containing protein, putative
4A	586682057	586682725	TraesCS4A01G279100	Germin-like protein 1-1
4A	586699223	586699897	TraesCS4A01G279200	Germin-like protein 1
4A	586708732	586709403	TraesCS4A01G279300	Germin-like protein
4A	586726830	586728762	TraesCS4A01G279400	Glycosyltransferase
4A	586731120	586731695	TraesCS4A01G279500	DUF538 family protein, putative (Protein of unknown function, DUF538)
4A	586732683	586737962	TraesCS4A01G279600	tRNA (Ile)-lysidine synthase
4A	586857087	586858056	TraesCS4A01G279700	DEAD box RNA helicase family protein
4A	587327316	587331588	TraesCS4A01G279800	Protein ENHANCED DISEASE RESISTANCE 2
4A	587724356	587724601	TraesCS4A01G279900	Cytochrome bc1 complex cytochrome b subunit
4A	588584846	588586918	TraesCS4A01G280000	Glycine-rich family protein
4A	588633613	588643252	TraesCS4A01G280100	Heat stress transcription factor A-9
4A	588658822	588659109	TraesCS4A01G280200	B3 domain-containing protein family
4A	588744270	588744707	TraesCS4A01G280300	Neurogenic differentiation factor 1
4A	588931457	588932492	TraesCS4A01G280400	Phenylalanine--tRNA ligase alpha subunit
4A	588939567	588940103	TraesCS4A01G280500	DUF538 family protein, putative (Protein of unknown function, DUF538)
4A	589011555	589015342	TraesCS4A01G280600	DUF538 family protein, putative (Protein of unknown function, DUF538)
4A	589085090	589089709	TraesCS4A01G280700	Beta-1,3-galactosyltransferase-like protein
4A	589108224	589111769	TraesCS4A01G280800	Protein UPSTREAM OF FLC
4A	589321088	589321744	TraesCS4A01G280900	Disease resistance protein RPM1
4A	589472934	589473664	TraesCS4A01G281000	Clavata3/ESR (CLE) gene family member
4A	589486132	589487151	TraesCS4A01G281100	F-box family protein
4A	589494063	589497494	TraesCS4A01G281200	Phosphatidylinositol N-acetyglucosaminlytransferase subunit P-like protein
4A	589499333	589501718	TraesCS4A01G281300	Core-2/I-branching beta-1,6-N-acetylglucosaminyltransferase family protein
4A	589503363	589507880	TraesCS4A01G281400	Hedgehog-interacting-like protein
4A	589586237	589592352	TraesCS4A01G281500	Nuclease domain-containing protein 1
4A	589600379	589601125	TraesCS4A01G281600	Octicosapeptide/Phox/Bem1p domain-containing family protein
4A	589602948	589607173	TraesCS4A01G281700	BHLH family protein, putative, expressed
4A	589661425	589662527	TraesCS4A01G281800	Thioesterase family protein
4A	589777427	589780505	TraesCS4A01G281900	Receptor kinase
4A	589787393	589791663	TraesCS4A01G282000	Serine/threonine-protein kinase
4A	589812884	589814112	TraesCS4A01G282100	Thioesterase family protein
4A	589835032	589836210	TraesCS4A01G282200	Thioesterase family protein
4A	589842588	589846517	TraesCS4A01G282300	Serine/threonine-protein kinase
4A	589878969	589879889	TraesCS4A01G282400	RNA-binding family protein isoform 1
4A	590088220	590091470	TraesCS4A01G282500	TBC1 domain family member
4A	590092917	590098247	TraesCS4A01G282600	FBD-associated F-box protein
4A	590103056	590105464	TraesCS4A01G282700	Costars family protein
4A	590107460	590112275	TraesCS4A01G282800	Tetratricopeptide repeat protein 38
4A	590112905	590117974	TraesCS4A01G282900	Plasma membrane ATPase
4A	590123388	590126855	TraesCS4A01G283000	B3 domain-containing protein
4A	590180868	590186819	TraesCS4A01G283100	Plasma membrane ATPase
4A	590204451	590236014	TraesCS4A01G283200	Inositol hexakisphosphate and diphosphoinositol-pentakisphosphate kinase
4A	590265720	590267385	TraesCS4A01G283300	Mediator complex, subunit Med7
4A	590277427	590280648	TraesCS4A01G283400	Calcium-dependent protein kinase
4A	590498160	590502931	TraesCS4A01G283500	Glycine-rich family protein
4A	590586089	590588803	TraesCS4A01G283600	Leucine-rich repeat protein kinase family protein
4A	590590295	590593639	TraesCS4A01G283700	Hexosyltransferase
4A	590625494	590626216	TraesCS4A01G283800	60S ribosomal protein L35a-like protein
4A	590656013	590660306	TraesCS4A01G283900	NRT1/PTR family protein 2.2
4A	590661142	590667513	TraesCS4A01G284000	5'-AMP-activated protein kinase subunit beta-2
4A	590900054	590900341	TraesCS4A01G284100	NADH-ubiquinone oxidoreductase subunit
4A	590901321	590912748	TraesCS4A01G284200	Calcineurin-binding protein cabin-1
4A	590935529	590935893	TraesCS4A01G284300	Protein NRT1/ PTR FAMILY 5.1
4A	590942611	590945363	TraesCS4A01G284400	GMP synthase [glutamine-hydrolyzing]
4A	590987939	590989668	TraesCS4A01G284500	rRNA methyltransferase
4A	590993812	590999321	TraesCS4A01G284600	Tesmin/TSO1-like CXC domain-containing protein
4A	591070502	591074036	TraesCS4A01G284700	WAT1-related protein
4A	591283782	591284566	TraesCS4A01G284800	Pollen allergen
4A	591293757	591294554	TraesCS4A01G284900	Pollen allergen Phl p 5
4A	591347606	591348302	TraesCS4A01G285000	Pollen allergen Phl p 5
4A	591505601	591506486	TraesCS4A01G285100	Transcription elongation factor 1
4A	591508137	591509534	TraesCS4A01G285200	Agmatine coumaroyltransferase-2
4A	591522546	591523056	TraesCS4A01G285300	C2 calcium/lipid-binding and GRAM domain containing protein
4A	591674857	591675826	TraesCS4A01G285500	Pollen allergen Phl p 5
4A	591696343	591699344	TraesCS4A01G285700	GDSL esterase/lipase
4A	591700622	591709892	TraesCS4A01G285800	E3 ubiquitin-protein ligase
4A	591711407	591715393	TraesCS4A01G285900	GATA transcription factor
4A	591845836	591851939	TraesCS4A01G286000	ARM repeat superfamily protein
4A	591854869	591856904	TraesCS4A01G286100	RecQ-mediated genome instability protein 2
4A	591861715	591862961	TraesCS4A01G286200	Aquaporin
4A	591864044	591866358	TraesCS4A01G286300	RecQ-mediated genome instability protein 2
4A	591868807	591873831	TraesCS4A01G286400	Magnesium transporter MRS2-like protein
4A	591874904	591877475	TraesCS4A01G286500	Exostosin-2
4A	591877897	591880030	TraesCS4A01G286600	Integral membrane HPP family protein
4A	591919611	591921968	TraesCS4A01G286700	Ferredoxin family protein, expressed
4A	592308951	592309850	TraesCS4A01G286800	Pollen allergen Phl p 5
4A	592334826	592335807	TraesCS4A01G286900	Pollen allergen Phl p 5
4A	592361121	592362093	TraesCS4A01G287000	Pollen allergen Phl p 5
4A	592486684	592491531	TraesCS4A01G287100	Hippocampus abundant transcript-like protein 1
4A	592521252	592521762	TraesCS4A01G287200	C2 calcium/lipid-binding and GRAM domain containing protein
4A	592543631	592547201	TraesCS4A01G287300	Peptide transporter
4A	592820500	592821897	TraesCS4A01G287500	Agmatine coumaroyltransferase-2
4A	592926089	592927358	TraesCS4A01G287600	Pollen allergen Phl p 5
4A	593100272	593100766	TraesCS4A01G287700	Agmatine coumaroyltransferase-2
4A	593105774	593106658	TraesCS4A01G287800	Transcription elongation factor 1
4A	593113190	593115887	TraesCS4A01G287900	Peptide transporter
4A	593194498	593201017	TraesCS4A01G288000	Argonaute protein
4A	593204562	593205374	TraesCS4A01G288100	DUF674 family protein
4A	593208070	593208944	TraesCS4A01G288200	DUF674 family protein
4A	593278588	593284719	TraesCS4A01G288300	Argonaute family protein
4A	593288154	593290058	TraesCS4A01G288400	Nodulin-like / Major Facilitator Superfamily protein
4A	593333205	593337537	TraesCS4A01G288500	RNA-binding protein
4A	593349509	593353817	TraesCS4A01G288600	WD40 repeat-like protein
4A	593354895	593357505	TraesCS4A01G288700	Beta-xylosidase, putative
4A	593376570	593380773	TraesCS4A01G288800	Ubiquitin-conjugating enzyme E2
4A	593495080	593495886	TraesCS4A01G288900	rRNA N-glycosidase
4A	593683757	593684092	TraesCS4A01G289000	Acetyl-coenzyme A carboxylase carboxyl transferase subunit beta
4A	593732899	593733846	TraesCS4A01G289100	F-box domain containing protein
4A	593735559	593753492	TraesCS4A01G289200	Golgi-body localization protein domain isoform 1
4A	593761646	593766038	TraesCS4A01G289300	Serine/arginine rich splicing factor, putative
4A	593915422	593918768	TraesCS4A01G289400	Homeobox protein BEL1 like
4A	594002643	594004359	TraesCS4A01G289500	BEL1-like homeodomain protein
4A	594005332	594010128	TraesCS4A01G289600	Ankyrin repeat family protein
4A	594028246	594033990	TraesCS4A01G289700	Ankyrin repeat family protein
4A	594039386	594040785	TraesCS4A01G289800	Leucine-rich repeat-containing protein 40
4A	594129754	594138636	TraesCS4A01G289900	Ankyrin repeat protein-like
4A	594140562	594147562	TraesCS4A01G290000	Ankyrin repeat family protein
4A	594150389	594160413	TraesCS4A01G290100	Ankyrin repeat protein-like
4A	594162606	594167272	TraesCS4A01G290200	Ankyrin repeat family protein
4A	594180504	594186598	TraesCS4A01G290300	Ankyrin repeat family protein
4A	594213511	594217122	TraesCS4A01G290400	Phosphomethylpyrimidine synthase
4A	594269604	594270674	TraesCS4A01G290500	Hexosyltransferase
4A	594283074	594284324	TraesCS4A01G290600	E3 ubiquitin-protein ligase
4A	594350894	594351879	TraesCS4A01G290700	AGAMOUS-like MADS-box transcription factor
4A	594364173	594364763	TraesCS4A01G290800	VQ motif-containing protein
4A	594367077	594367568	TraesCS4A01G290900	Glycine-rich protein
4A	594378156	594378956	TraesCS4A01G291000	Thymocyte nuclear protein 1
4A	594392621	594393043	TraesCS4A01G291100	myosin XI D
4A	594427650	594428144	TraesCS4A01G291200	BZIP transcription factor
4A	594441999	594443029	TraesCS4A01G291300	Neuropeptide Y receptor type 1
4A	594460318	594460773	TraesCS4A01G291400	Fasciclin-like arabinogalactan protein 16
4A	594533060	594535487	TraesCS4A01G291500	Growth-regulating factor
4A	594663909	594668712	TraesCS4A01G291600	DUF21 domain-containing protein
4A	594680010	594686220	TraesCS4A01G291700	ERD (Early-responsive to dehydration stress) family protein
4A	594700662	594700862	TraesCS4A01G291800	double-stranded-RNA-binding protein 4
4A	594706438	594711422	TraesCS4A01G291900	homeobox-1
4A	594730519	594732003	TraesCS4A01G292000	Homeobox transcription factor KN2
4A	594737676	594742642	TraesCS4A01G292100	homeobox-1
4A	595046191	595056136	TraesCS4A01G292200	Homeobox protein knotted-1-like 1
4A	595192015	595194917	TraesCS4A01G292300	Endo-1,4-beta-xylanase, putative, expressed
4A	595216786	595217267	TraesCS4A01G292400	Epidermal patterning factor-like protein
4A	595255785	595257327	TraesCS4A01G292500	Chalcone synthase
4A	595262203	595264949	TraesCS4A01G292600	Transmembrane protein, putative
4A	595282332	595284053	TraesCS4A01G292700	basic helix-loop-helix (bHLH) DNA-binding superfamily protein
4A	595294357	595296747	TraesCS4A01G292800	basic helix-loop-helix (bHLH) DNA-binding superfamily protein
4A	595329657	595352176	TraesCS4A01G292900	ADP-ribosylation factor
4A	595359708	595360304	TraesCS4A01G293000	RNA-binding protein
4A	595374853	595376903	TraesCS4A01G293100	NADH-ubiquinone oxidoreductase chain 5
4A	595382839	595387139	TraesCS4A01G293200	Pentatricopeptide repeat-containing protein
4A	595388538	595396020	TraesCS4A01G293300	Tryptophan--tRNA ligase
4A	595391148	595393497	TraesCS4A01G293400	Hsp70-Hsp90 organizing protein 1
4A	595417616	595419298	TraesCS4A01G293500	Glucan endo-1,3-beta-glucosidase
4A	595422877	595424025	TraesCS4A01G293600	Ubiquitin carboxyl-terminal hydrolase-like protein
4A	595442919	595443945	TraesCS4A01G293700	SBP (S-ribonuclease-binding protein) family protein, putative
4A	595545817	595549141	TraesCS4A01G293800	Acidic leucine-rich nuclear phosphoprotein 32-related protein
4A	595549815	595550617	TraesCS4A01G293900	Deoxyuridine 5'-triphosphate nucleotidohydrolase
4A	595552210	595557131	TraesCS4A01G294000	Guanine nucleotide-binding protein subunit beta
4A	595563706	595571876	TraesCS4A01G294100	Aminopeptidase
4A	595655367	595659110	TraesCS4A01G294200	Zinc transporter
4A	595661422	595663903	TraesCS4A01G294300	Zinc transporter
4A	595817811	595821043	TraesCS4A01G294400	Regulatory protein NPR1
4A	595844117	595846462	TraesCS4A01G294500	Transmembrane protein 56
4A	595847372	595852760	TraesCS4A01G294600	Ras family protein
4A	595873167	595876206	TraesCS4A01G294700	Trihelix transcription factor GT-4-like protein
4A	595978865	595983627	TraesCS4A01G294800	Pleckstrin-like (PH) domain protein
4A	595984431	595989792	TraesCS4A01G294900	Guanine nucleotide exchange family protein
4A	595994746	595997670	TraesCS4A01G295000	Kinesin-like protein
4A	596002078	596002431	TraesCS4A01G295100	DUF1677 family protein
4A	596075859	596076185	TraesCS4A01G295200	UvrABC system protein C
4A	596159177	596161899	TraesCS4A01G295300	senescence-associated family protein, putative (DUF581)
4A	596165884	596166559	TraesCS4A01G295400	Acetyltransferase, GNAT family protein, expressed
4A	596166617	596167246	TraesCS4A01G295500	Acetyltransferase, GNAT family protein, expressed
4A	596214978	596215939	TraesCS4A01G295600	Lipid transfer protein
4A	596221994	596223703	TraesCS4A01G295700	PHP
4A	596238333	596239331	TraesCS4A01G295800	Lipid transfer protein
4A	596297994	596300601	TraesCS4A01G295900	Nuclear transport factor 2 (NTF2) family protein with RNA binding (RRM-RBD-RNP motifs) domain-containing protein
4A	596304904	596307334	TraesCS4A01G296000	Globulin 1
4A	596446060	596448236	TraesCS4A01G296100	Globulin 1
4A	596504054	596509118	TraesCS4A01G296200	Type I inositol-1,4,5-trisphosphate 5-phosphatase CVP2
4A	596523171	596523860	TraesCS4A01G296300	Thaumatin-like protein
4A	596537351	596537656	TraesCS4A01G296400	Thaumatin-like protein
4A	596570488	596571926	TraesCS4A01G296500	Ethylene-responsive nuclear / ethylene-regulated nuclear protein (ERT2)-like protein
4A	596624604	596628189	TraesCS4A01G296600	Tubulin beta chain
4A	596672137	596673917	TraesCS4A01G296700	E3 ubiquitin-protein ligase
4A	596680691	596680954	TraesCS4A01G296800	SAUR-like auxin-responsive protein family
4A	596688333	596688617	TraesCS4A01G296900	SAUR-like auxin-responsive protein family
4A	596713062	596713349	TraesCS4A01G297000	SAUR-like auxin-responsive protein family
4A	596738067	596738378	TraesCS4A01G297100	SAUR-like auxin-responsive protein family
4A	596743214	596743525	TraesCS4A01G297200	SAUR-like auxin-responsive protein family
4A	596758261	596765940	TraesCS4A01G297300	S3 self-incompatibility locus-linked pollen protein
4A	596767433	596769827	TraesCS4A01G297400	PH-response transcription factor pacC/RIM101 isoform 2
4A	596770660	596773730	TraesCS4A01G297500	LOB domain protein
4A	596789012	596792340	TraesCS4A01G297600	Pre-rRNA-processing protein TSR2
4A	596817382	596821918	TraesCS4A01G297700	DWNN domain, a CCHC-type zinc finger
4A	596825257	596827047	TraesCS4A01G297800	Lactoylglutathione lyase
4A	596827940	596828380	TraesCS4A01G297900	Ferredoxin
4A	596835928	596840310	TraesCS4A01G298000	TATA-box-binding protein
4A	596920259	596923717	TraesCS4A01G298100	N utilization substance protein B-like protein
4A	597013077	597015822	TraesCS4A01G298200	Glucan endo-1,3-beta-glucosidase, putative
4A	597023208	597024827	TraesCS4A01G298300	Non specific phospholipase C
4A	597052406	597054154	TraesCS4A01G298400	Cation calcium exchanger
4A	597668209	597670977	TraesCS4A01G298500	Chaperone protein DnaJ
4A	597671700	597672868	TraesCS4A01G298600	Heat shock family protein
4A	597677918	597682345	TraesCS4A01G298700	5-methyltetrahydropteroyltriglutamate--homocysteine methyltransferase
4A	597714516	597715616	TraesCS4A01G298900	Potassium channel
4A	597724268	597725956	TraesCS4A01G299000	Ankyrin repeat-containing protein
4A	597754246	597754554	TraesCS4A01G299100	Dehydrin family protein, expressed
4A	597826624	597830284	TraesCS4A01G299200	HSP20-like chaperone superfamily protein
4A	597833941	597837160	TraesCS4A01G299300	Membrin
4A	597841374	597845533	TraesCS4A01G299400	Short-chain dehydrogenase/reductase family protein
4A	597855871	597861216	TraesCS4A01G299500	Polyribonucleotide nucleotidyltransferase
4A	597886889	597888409	TraesCS4A01G299600	Glycosyltransferase
4A	597905256	597909732	TraesCS4A01G299700	Transmembrane protein
4A	597912275	597916528	TraesCS4A01G299800	Cationic amino acid transporter, putative
4A	597917105	597928087	TraesCS4A01G299900	Carboxypeptidase
4A	597919165	597920004	TraesCS4A01G300000	nuclear pore anchor
4A	597943888	597946110	TraesCS4A01G300100	Carboxypeptidase
4A	597970675	597971288	TraesCS4A01G300200	Carboxypeptidase
4A	598051227	598059177	TraesCS4A01G300300	CCR4-NOT transcription complex subunit 3
4A	598146082	598149543	TraesCS4A01G300400	C2 calcium/lipid-binding and GRAM domain protein
4A	598156692	598157063	TraesCS4A01G300500	calpain-type cysteine protease family
4A	598236284	598237934	TraesCS4A01G300600	CsAtPR5
4A	598240305	598241658	TraesCS4A01G300700	Phospholipase A1
4A	598245669	598247060	TraesCS4A01G300800	Phospholipase A1
4A	598294664	598296479	TraesCS4A01G300900	Phospholipase A1
4A	598417709	598418041	TraesCS4A01G301000	Transducin/WD40 repeat-like superfamily protein
4A	598435208	598437212	TraesCS4A01G301100	Phosphate transporter
4A	598451057	598451640	TraesCS4A01G301200	Zinc finger protein 512B family
4A	598453191	598455202	TraesCS4A01G301300	UDP-N-acetylmuramate--L-alanine ligase
4A	598516610	598516873	TraesCS4A01G301400	syntaxin of plants 41
4A	598583700	598584248	TraesCS4A01G301500	Formate-dependent phosphoribosylglycinamide formyltransferase
4A	598590265	598592108	TraesCS4A01G301600	Methyltransferase
4A	598601370	598603264	TraesCS4A01G301700	Xylose isomerase 1
4A	598607823	598609741	TraesCS4A01G301800	kinase with adenine nucleotide alpha hydrolases-like domain-containing protein
4A	598712564	598716142	TraesCS4A01G301900	Polyadenylation and cleavage factor
4A	598719419	598726719	TraesCS4A01G302000	Protein kinase family protein
4A	598730760	598732038	TraesCS4A01G302100	DUF868 family protein (DUF868)
4A	598761093	598763505	TraesCS4A01G302200	Histidine-containing phosphotransfer protein
4A	598778564	598781535	TraesCS4A01G302300	Histidine-containing phosphotransfer protein
4A	598791728	598805534	TraesCS4A01G302400	Histidine-containing phosphotransfer protein
4A	598807712	598810145	TraesCS4A01G302500	Histidine-containing phosphotransfer protein
4A	598813075	598815848	TraesCS4A01G302600	Histidine-containing phosphotransfer protein
4A	599082111	599084563	TraesCS4A01G302700	Histidine-containing phosphotransfer protein
4A	599098473	599102373	TraesCS4A01G302800	Histidine-containing phosphotransfer protein
4A	599123334	599125774	TraesCS4A01G302900	Histidine-containing phosphotransfer protein
4A	599156292	599158592	TraesCS4A01G303000	Histidine-containing phosphotransfer protein
4A	599219291	599223173	TraesCS4A01G303100	Histidine-containing phosphotransfer protein
4A	599245371	599247813	TraesCS4A01G303200	Histidine-containing phosphotransfer protein
4A	599318185	599321542	TraesCS4A01G303300	Monodehydroascorbate reductase
4A	599321764	599326557	TraesCS4A01G303400	Aldo-keto reductase/ oxidoreductase
4A	599348646	599351947	TraesCS4A01G303500	Histidine-containing phosphotransfer protein
4A	599467504	599470183	TraesCS4A01G303600	GDSL esterase/lipase
4A	599586672	599586953	TraesCS4A01G303700	50S ribosomal protein L23
4A	599587932	599588347	TraesCS4A01G303800	UDP-N-acetylglucosamine 1-carboxyvinyltransferase
4A	599611950	599613428	TraesCS4A01G303900	3-ketoacyl-CoA synthase
4A	599620398	599621905	TraesCS4A01G304000	HXXXD-type acyl-transferase family protein, putative
4A	599628039	599630576	TraesCS4A01G304100	Histidine-containing phosphotransfer protein
4A	599643580	599646362	TraesCS4A01G304200	Histidine-containing phosphotransfer protein
4A	599729672	599732995	TraesCS4A01G304300	GDSL esterase/lipase
4A	599842221	599846313	TraesCS4A01G304400	Fatty acyl-CoA reductase
4A	599887495	599892991	TraesCS4A01G304500	Protein HIRA
4A	599893273	599897686	TraesCS4A01G304600	GDSL esterase/lipase
4A	600387015	600387904	TraesCS4A01G304700	GDSL esterase/lipase
4A	600465221	600466069	TraesCS4A01G304800	F-box domain containing protein
4A	600557899	600558255	TraesCS4A01G305000	acetyl Co-enzyme a carboxylase carboxyltransferase alpha subunit
4A	600562291	600562677	TraesCS4A01G305100	PP2C protein (Clade A protein phosphatases type 2C)
4A	600623641	600624018	TraesCS4A01G305200	Voltage-dependent calcium channel gamma-3 subunit
4A	600898793	600901403	TraesCS4A01G305300	Ribosomal protein
4A	600902966	600906006	TraesCS4A01G305400	R3h domain containing protein, putative
4A	600912003	600913370	TraesCS4A01G305500	Leucine-rich repeat receptor-like protein kinase family protein
4A	600913413	600914954	TraesCS4A01G305600	Leucine-rich repeat receptor-like protein kinase family protein
4A	600918067	600918777	TraesCS4A01G305700	Leucine-rich repeat receptor-like protein kinase family protein
4A	600918976	600919929	TraesCS4A01G305800	Leucine-rich repeat receptor-like protein kinase family protein
4A	600973780	600976674	TraesCS4A01G305900	Leucine-rich repeat receptor-like protein kinase family protein
4A	601006374	601007264	TraesCS4A01G306000	Leucine-rich repeat receptor-like protein kinase family protein
4A	601015641	601018036	TraesCS4A01G306100	Leucine-rich repeat receptor-like protein kinase family protein
4A	601032932	601035720	TraesCS4A01G306200	Leucine-rich repeat receptor-like protein kinase family protein
4A	601039945	601041268	TraesCS4A01G306300	Sulfate adenylyltransferase subunit 2
4A	601042166	601044648	TraesCS4A01G306400	Nuclear transcription factor Y subunit B
4A	601059795	601062569	TraesCS4A01G306500	Ubiquitin
4A	601156437	601157280	TraesCS4A01G306600	Germin-like protein
4A	601170067	601170582	TraesCS4A01G306700	Germin-like protein
4A	601178223	601178885	TraesCS4A01G306800	Germin-like protein
4A	601180599	601181212	TraesCS4A01G306900	Germin-like protein
4A	601194129	601194761	TraesCS4A01G307000	Germin-like protein
4A	601196302	601197426	TraesCS4A01G307100	40S ribosomal protein S25, putative
4A	601243050	601248526	TraesCS4A01G307200	Hexosyltransferase
4A	601276423	601279582	TraesCS4A01G307300	F1F0-ATPase inhibitor protein
4A	601283765	601284744	TraesCS4A01G307400	Dirigent protein
4A	601309805	601313807	TraesCS4A01G307500	Receptor protein kinase, putative
4A	601337777	601338814	TraesCS4A01G307600	Cytochrome P450 family protein, expressed
4A	601338817	601339314	TraesCS4A01G307700	Cytochrome P450 family protein, expressed
4A	601356729	601357874	TraesCS4A01G307800	Haloacid dehalogenase-like hydrolase superfamily protein
4A	601364149	601367728	TraesCS4A01G307900	Beta-amylase
4A	601691310	601691909	TraesCS4A01G308000	DNA-directed RNA polymerase subunit
4A	601721962	601724493	TraesCS4A01G308100	Queuine tRNA-ribosyltransferase
4A	602053534	602061759	TraesCS4A01G308200	ABC transporter G family member
4A	602106173	602113523	TraesCS4A01G308300	NBS-LRR disease resistance protein-like protein
4A	602114965	602118639	TraesCS4A01G308400	Sn1-specific diacylglycerol lipase alpha
4A	602131245	602131586	TraesCS4A01G308500	Endosperm transfer cell specific PR9
4A	602248955	602250749	TraesCS4A01G308600	Cytochrome P450 family protein, expressed
4A	602260036	602261169	TraesCS4A01G308700	2-oxoglutarate (2OG) and Fe(II)-dependent oxygenase superfamily protein
4A	602269708	602272129	TraesCS4A01G308800	Cytochrome P450
4A	602272639	602274102	TraesCS4A01G308900	Glycosyltransferase
4A	602306511	602307929	TraesCS4A01G309000	Glycosyltransferase
4A	602379677	602381627	TraesCS4A01G309100	F-box family protein
4A	602621396	602653205	TraesCS4A01G309200	receptor kinase 1
4A	602797611	602798738	TraesCS4A01G309300	Cysteine protease-like protein
4A	602863275	602864408	TraesCS4A01G309400	2-oxoglutarate (2OG) and Fe(II)-dependent oxygenase superfamily protein
4A	602870810	602873131	TraesCS4A01G309500	NBS-LRR disease resistance protein
4A	602873144	602875409	TraesCS4A01G309600	NBS-LRR-like resistance protein
4A	602898874	602900427	TraesCS4A01G309700	Disease resistance protein RGA2
4A	602951973	602952419	TraesCS4A01G309800	nucleolar-like protein
4A	603030535	603031895	TraesCS4A01G309900	Wall-associated receptor kinase 2
4A	603031991	603032776	TraesCS4A01G310000	Receptor-like protein kinase
4A	603034418	603038171	TraesCS4A01G310100	Receptor-like protein kinase
4A	603043878	603048236	TraesCS4A01G310200	Disease resistance protein (NBS-LRR class) family
4A	603281751	603283618	TraesCS4A01G310400	ACT domain-containing protein
4A	603340065	603340286	TraesCS4A01G310500	Powder tolerance-related protein
4A	603372855	603375220	TraesCS4A01G310600	PsbP-like protein 1
4A	603377077	603380232	TraesCS4A01G310700	C2H2-like zinc finger protein, putative
4A	603382876	603384074	TraesCS4A01G310800	Protein kinase, putative
4A	603389076	603390446	TraesCS4A01G310900	F-box family protein
4A	603405890	603409736	TraesCS4A01G311000	2-oxoglutarate (2OG) and Fe(II)-dependent oxygenase superfamily protein
4A	603446017	603450038	TraesCS4A01G311100	Poly(A) RNA polymerase GLD2-A
4A	603451508	603455462	TraesCS4A01G311200	RING/U-box superfamily protein
4A	603458896	603462620	TraesCS4A01G311300	Phosphate transporter
4A	603464816	603468137	TraesCS4A01G311400	Short-chain dehydrogenase/reductase family protein
4A	603469204	603469938	TraesCS4A01G311500	F-box family protein
4A	603481988	603482257	TraesCS4A01G311600	Histone H2B
4A	603487771	603490362	TraesCS4A01G311700	ACT domain-containing protein
4A	603497203	603499122	TraesCS4A01G311800	Protein UPSTREAM OF FLC
4A	603504251	603504949	TraesCS4A01G311900	Antimicrobial peptide MBP-1 related (LEM1)
4A	603506946	603507572	TraesCS4A01G312000	TRAF-like superfamily protein
4A	603511086	603513774	TraesCS4A01G312100	Hydroxyproline-rich glycoprotein family protein
4A	603531246	603533012	TraesCS4A01G312200	mesoderm induction early response protein
4A	603533796	603535084	TraesCS4A01G312300	Calcium-dependent lipid-binding domain protein
4A	603539694	603540551	TraesCS4A01G312400	AT hook motif DNA-binding family protein
4A	603634761	603635540	TraesCS4A01G312500	LOB domain-containing protein, putative
4A	603637548	603638907	TraesCS4A01G312600	Peptidyl-prolyl cis-trans isomerase
4A	603666136	603667011	TraesCS4A01G312700	Aquaporin-like protein
4A	603674525	603681868	TraesCS4A01G312800	Disease resistance protein (NBS-LRR class) family
4A	603698121	603703864	TraesCS4A01G312900	Disease resistance protein (NBS-LRR class) family
4A	603726600	603729539	TraesCS4A01G313100	Leucine-rich repeat receptor-like protein kinase family protein
4A	603980200	603981915	TraesCS4A01G313200	Flavin-containing monooxygenase
4A	604055487	604056041	TraesCS4A01G313300	AWPM-19-like membrane family protein
4A	604068519	604069061	TraesCS4A01G313400	AWPM-19-like membrane family protein
4A	604076529	604093392	TraesCS4A01G313500	Myosin
4A	604101314	604103592	TraesCS4A01G313600	Ubiquitin-conjugating enzyme E2
4A	604104116	604105207	TraesCS4A01G313700	2-oxoglutarate (2OG) and Fe(II)-dependent oxygenase superfamily protein, putative
4A	604107899	604111305	TraesCS4A01G313800	B3 domain-containing protein
4A	604208547	604211960	TraesCS4A01G313900	Receptor-like protein kinase
4A	604594773	604595687	TraesCS4A01G314000	2-oxoglutarate (2OG) and Fe(II)-dependent oxygenase superfamily protein
4A	604659700	604661064	TraesCS4A01G314100	Anthocyanin 5-aromatic acyltransferase
4A	604672359	604672679	TraesCS4A01G314200	Receptor-like kinase
4A	604772917	604775106	TraesCS4A01G314300	Disease resistance protein RPM1
4A	604847255	604850213	TraesCS4A01G314400	Disease resistance protein RPM1
4A	604856722	604857722	TraesCS4A01G314500	Ethylene-responsive transcription factor
4A	604940612	604941666	TraesCS4A01G314600	Ethylene-responsive transcription factor
4A	605011157	605019060	TraesCS4A01G314700	BTB/POZ/MATH-domain protein
4A	605024348	605027787	TraesCS4A01G314800	transcription factor, putative (Protein of unknown function, DUF547)
4A	605085385	605087313	TraesCS4A01G314900	Sugar transporter, putative
4A	605135482	605137364	TraesCS4A01G315000	Serine/threonine-protein phosphatase
4A	605559706	605576513	TraesCS4A01G315100	Protein kinase
4A	605640606	605646822	TraesCS4A01G315200	OTU domain-containing protein
4A	605644790	605646059	TraesCS4A01G315300	Trihelix transcription factor
4A	605650689	605651247	TraesCS4A01G315400	Early nodulin-like protein
4A	605656378	605659792	TraesCS4A01G315500	60 kDa chaperonin
4A	605663621	605667985	TraesCS4A01G315600	Mediator of RNA polymerase II transcription subunit 15a
4A	605711438	605714093	TraesCS4A01G315700	RNA polymerase sigma factor
4A	605717729	605733179	TraesCS4A01G315800	Mediator of RNA polymerase II transcription subunit 13
4A	605744972	605749290	TraesCS4A01G315900	ABC transporter G family member
4A	606116328	606116585	TraesCS4A01G316000	Cytoplasmic polyadenylation element-binding protein 4
4A	606339516	606340395	TraesCS4A01G316100	F-box family protein
4A	606344404	606347550	TraesCS4A01G316200	Heavy metal-associated protein
4A	606361307	606365891	TraesCS4A01G316300	La-related protein
4A	606370348	606374153	TraesCS4A01G316400	GDSL esterase/lipase
4A	606397501	606401304	TraesCS4A01G316500	GDSL esterase/lipase
4A	606411251	606412810	TraesCS4A01G316600	Protein DETOXIFICATION
4A	606523492	606525117	TraesCS4A01G316700	Avr9/Cf-9 rapidly elicited protein
4A	606536601	606541208	TraesCS4A01G316800	WD40 repeat-containing protein
4A	606586469	606587515	TraesCS4A01G316900	phosphotransferases/inositol or phosphatidylinositol kinase
4A	606591102	606591425	TraesCS4A01G317000	Bifunctional inhibitor/lipid-transfer protein/seed storage 2S albumin-like protein
4A	606593204	606593985	TraesCS4A01G317100	DNA translocase FtsK
4A	606608746	606609752	TraesCS4A01G317200	Harpin-induced protein 1 (Hin1), putative
4A	606644043	606645527	TraesCS4A01G317300	Galactose-6-phosphate isomerase subunit LacB
4A	606647800	606648237	TraesCS4A01G317400	Mannonate dehydratase
4A	606761195	606779668	TraesCS4A01G317500	Kinase family protein
4A	606796975	606806270	TraesCS4A01G317600	Kinase family protein
4A	606811790	606812212	TraesCS4A01G317700	Oxidoreductase/transition metal ion-binding protein
4A	607045527	607055050	TraesCS4A01G317800	Exportin-1
4A	607177428	607178300	TraesCS4A01G317900	Cytokinin riboside 5'-monophosphate phosphoribohydrolase
4A	607178925	607179542	TraesCS4A01G318000	Plant invertase/pectin methylesterase inhibitor superfamily
4A	607261315	607262061	TraesCS4A01G318100	Cytokinin riboside 5'-monophosphate phosphoribohydrolase
4A	607270018	607270363	TraesCS4A01G318200	F-box only 46
4A	607271201	607274122	TraesCS4A01G318300	Leucine-rich repeat receptor-like protein kinase family protein
4A	607309139	607310644	TraesCS4A01G318400	ATP-dependent zinc metalloprotease FtsH
4A	607374419	607374938	TraesCS4A01G318500	DNA topoisomerase
4A	607378184	607378939	TraesCS4A01G318600	EMBRYO SURROUNDING FACTOR 1-like protein 8
4A	607417310	607417758	TraesCS4A01G318700	Pentatricopeptide repeat-containing protein At1g19720
4A	607427642	607428537	TraesCS4A01G318800	carbohydrate esterase, putative (DUF303)
4A	607432191	607434672	TraesCS4A01G318900	NAD/NADP-dependent betaine aldehyde dehydrogenase
4A	607633308	607635652	TraesCS4A01G319000	PGR5-like protein 1A, chloroplastic
4A	608043668	608044864	TraesCS4A01G319100	Gibberellin 20 oxidase
4A	608260037	608261317	TraesCS4A01G319200	F-box protein PP2
4A	608267651	608271046	TraesCS4A01G319300	Disease resistance protein (NBS-LRR class) family
4A	608478075	608481479	TraesCS4A01G319400	Disease resistance protein (NBS-LRR class) family
4A	608554446	608556572	TraesCS4A01G319500	Pentatricopeptide repeat-containing protein
4A	608558256	608560511	TraesCS4A01G319600	Coatomer subunit zeta
4A	608560774	608562889	TraesCS4A01G319700	Dehydrogenase/reductase SDR family protein
4A	608602654	608609084	TraesCS4A01G319800	ATP-dependent DNA helicase 2 subunit KU80
4A	608610038	608610918	TraesCS4A01G319900	Acyl carrier protein
4A	608828643	608834674	TraesCS4A01G320000	Sucrose nonfermenting 4-like protein
4A	608836776	608838380	TraesCS4A01G320100	2-oxoglutarate (2OG) and Fe(II)-dependent oxygenase superfamily protein
4A	608866790	608868195	TraesCS4A01G320200	Ribosome hibernation promotion factor
4A	608879224	608880208	TraesCS4A01G320300	DNA-(apurinic or apyrimidinic site) lyase
4A	608881132	608882197	TraesCS4A01G320400	F-box protein PP2
4A	608983186	608987723	TraesCS4A01G320500	Outer envelope pore protein 24B, chloroplastic
4A	608990462	608990752	TraesCS4A01G320600	RADIALIS-like transcription factor
4A	609070959	609072655	TraesCS4A01G320700	F-box protein
4A	609080072	609084634	TraesCS4A01G320800	WRKY transcription factor
4A	609132923	609133702	TraesCS4A01G320900	RING/U-box superfamily protein
4A	609182691	609183530	TraesCS4A01G321000	Protein YIPF
4A	609564170	609566524	TraesCS4A01G321200	RING/U-box superfamily protein, putative
4A	609804687	609807321	TraesCS4A01G321300	Poly [ADP-ribose] polymerase
4A	609815821	609818981	TraesCS4A01G321400	Beta-fructofuranosidase, insoluble protein
4A	609917868	609922743	TraesCS4A01G321500	Beta-fructofuranosidase, insoluble protein
4A	609926193	609929495	TraesCS4A01G321600	Beta-fructofuranosidase, insoluble protein
4A	610034075	610036709	TraesCS4A01G321700	Cell wall invertase
4A	610041237	610042322	TraesCS4A01G321800	Xyloglucan endotransglucosylase/hydrolase
4A	610089743	610090656	TraesCS4A01G321900	F-box family protein
4A	610130944	610132777	TraesCS4A01G322000	F-box family protein
4A	610250073	610252980	TraesCS4A01G322100	SPFH domain/band 7 family protein
4A	610261683	610263056	TraesCS4A01G322200	Myb factor
4A	610484185	610490550	TraesCS4A01G322300	Heat shock transcription factor family protein
4A	610493560	610496978	TraesCS4A01G322400	RNA-binding family protein, putative
4A	610497225	610500400	TraesCS4A01G322500	Polyribonucleotide nucleotidyltransferase, putative
4A	610618883	610629153	TraesCS4A01G322600	E3 ubiquitin-protein ligase listerin
4A	610640193	610642379	TraesCS4A01G322700	F-box family protein
4A	610706805	610709026	TraesCS4A01G322800	F-box family protein
4A	610816015	610818670	TraesCS4A01G322900	F-box family protein
4A	611025042	611028000	TraesCS4A01G323000	F-box family protein
4A	611071297	611073599	TraesCS4A01G323200	F-box family protein
4A	611201294	611203594	TraesCS4A01G323300	F-box family protein
4A	611264184	611266257	TraesCS4A01G323400	Receptor protein kinase, putative
4A	611268602	611271640	TraesCS4A01G323500	Protein kinase
4A	611278023	611278475	TraesCS4A01G323600	30S ribosomal protein S9
4A	611579698	611583177	TraesCS4A01G323700	ADP-ribosylation factor GTPase-activating protein
4A	611592308	611592874	TraesCS4A01G323800	AIG2-like (Avirulence induced gene) family protein
4A	611656148	611656933	TraesCS4A01G323900	WPP domain associated protein
4A	611687436	611690317	TraesCS4A01G324000	Protein BCCIP homolog
4A	611932162	611935806	TraesCS4A01G324100	ATP-dependent Clp protease ATP-binding subunit
4A	611976530	611977103	TraesCS4A01G324200	ATP-dependent Clp protease ATP-binding subunit ClpB
4A	612040266	612041864	TraesCS4A01G324300	Anthocyanin 3'-O-beta-glucosyltransferase
4A	612059812	612061668	TraesCS4A01G324400	Transmembrane 70, mitochondrial
4A	612062177	612065071	TraesCS4A01G324500	GC-rich sequence DNA-binding factor 1
4A	612072756	612078364	TraesCS4A01G324600	Ribonuclease P protein subunit P38, related protein
4A	612079125	612084522	TraesCS4A01G324700	Protein BREVIS RADIX
4A	612110333	612114060	TraesCS4A01G324800	Cleavage and polyadenylation specificity factor subunit 3
4A	612372451	612392100	TraesCS4A01G324900	Methyl-CpG-binding domain-containing protein 9
4A	612426443	612433137	TraesCS4A01G325000	Ankyrin repeat family protein
4A	612442435	612443827	TraesCS4A01G325100	Methyl-CpG-binding domain-containing protein 9
4A	612531673	612533481	TraesCS4A01G325200	F-box family protein
4A	613266770	613268275	TraesCS4A01G325300	Pentatricopeptide repeat-containing protein
4A	613268358	613271776	TraesCS4A01G325400	Flavin-containing monooxygenase
4A	613319821	613321985	TraesCS4A01G325500	Ycf20-like protein
4A	613322410	613325605	TraesCS4A01G325600	Tumor necrosis factor receptor superfamily member 21
4A	613330067	613333466	TraesCS4A01G325700	Receptor-like protein kinase
4A	613367368	613367595	TraesCS4A01G325800	Hydroxyproline-rich glycoprotein
4A	613398947	613400085	TraesCS4A01G325900	Protein kinase family protein
4A	613401832	613406707	TraesCS4A01G326000	Nuclear factor Y, putative
4A	613412237	613416220	TraesCS4A01G326100	Derlin
4A	613417884	613419340	TraesCS4A01G326200	Pentatricopeptide repeat-containing protein, putative
4A	613422860	613423415	TraesCS4A01G326300	Hydroxyproline-rich glycoprotein family protein
4A	613543523	613544365	TraesCS4A01G326400	Ethylene-responsive transcription factor
4A	613559481	613562327	TraesCS4A01G326500	Epstein-Barr virus EBNA-1-like protein
4A	613568109	613568616	TraesCS4A01G326600	Hydroxyproline-rich glycoprotein family protein
4A	613581481	613582994	TraesCS4A01G326700	Acyl-[acyl-carrier-protein] desaturase
4A	613606291	613615092	TraesCS4A01G326800	Transducin/WD-like repeat-protein
4A	613667357	613668904	TraesCS4A01G326900	Organic cation/carnitine transporter
4A	613697285	613704538	TraesCS4A01G327000	carboxyl-terminal peptidase, putative (DUF239)
4A	613740671	613742242	TraesCS4A01G327100	Receptor-like protein kinase
4A	613742362	613744101	TraesCS4A01G327200	Leucine-rich repeat receptor kinase-like protein
4A	613765165	613767888	TraesCS4A01G327300	Disease resistance protein RPM1
4A	613804119	613812765	TraesCS4A01G327400	carboxyl-terminal peptidase, putative (DUF239)
4A	613816530	613819414	TraesCS4A01G327500	Protein transport protein Sec61 subunit alpha
4A	613855345	613861730	TraesCS4A01G327600	carboxyl-terminal peptidase, putative (DUF239)
4A	614004317	614006188	TraesCS4A01G327900	Tropinone reductase-like protein
4A	614014654	614016256	TraesCS4A01G328000	Tropinone reductase-like protein
4A	614018608	614019552	TraesCS4A01G328100	Aspartic proteinase nepenthesin-1
4A	614027490	614029756	TraesCS4A01G328200	Pantothenate synthetase
4A	614029976	614030492	TraesCS4A01G328300	mechanosensitive channel of small conductance-like 9
4A	614031503	614033643	TraesCS4A01G328400	Pentatricopeptide repeat-containing protein
4A	614101649	614103184	TraesCS4A01G328500	Pentatricopeptide repeat-containing protein
4A	614106743	614108525	TraesCS4A01G328600	Ankyrin repeat domain protein, putative
4A	614111306	614116597	TraesCS4A01G328700	Transducin/WD-like repeat-protein
4A	614228693	614230620	TraesCS4A01G328800	Laccase
4A	614241223	614243111	TraesCS4A01G328900	cobalt ion-binding protein
4A	614244840	614247194	TraesCS4A01G329000	FRIGIDA-like protein, putative
4A	614252518	614258300	TraesCS4A01G329100	Disease resistance protein (NBS-LRR class) family
4A	614401759	614406887	TraesCS4A01G329200	Protein ZINC INDUCED FACILITATOR-LIKE 1
4A	614411595	614415624	TraesCS4A01G329300	U2 small nuclear ribonucleoprotein A
4A	614416477	614426973	TraesCS4A01G329400	E3 ubiquitin-protein ligase SspH2
4A	614609275	614612070	TraesCS4A01G329500	DEAD-box ATP-dependent RNA helicase 52A
4A	614867396	614871236	TraesCS4A01G329600	26S proteasome non-ATPase regulatory subunit
4A	614906939	614908430	TraesCS4A01G329700	F-box family protein
4A	615032206	615040140	TraesCS4A01G329800	receptor kinase 1
4A	615099611	615101105	TraesCS4A01G329900	F-box family protein
4A	615104066	615106167	TraesCS4A01G330000	protein kinase family protein
4A	615106331	615107512	TraesCS4A01G330100	Leucine-rich repeat receptor-like protein kinase family protein
4A	615193675	615198039	TraesCS4A01G330200	Monothiol glutaredoxin
4A	615205524	615209815	TraesCS4A01G330300	Glutaredoxin
4A	615212565	615216245	TraesCS4A01G330400	Elongation factor Tu
4A	615362649	615364826	TraesCS4A01G330600	F-box/RNI-like/FBD-like domains-containing protein
4A	615372042	615372374	TraesCS4A01G330700	Rust resistance-like protein RP1
4A	615437069	615439255	TraesCS4A01G330800	Shikimate dehydrogenase (NADP(+))
4A	615445461	615447633	TraesCS4A01G330900	LRR-RLK
4A	615455264	615457337	TraesCS4A01G331000	F-box family protein
4A	615694100	615702325	TraesCS4A01G331100	Pleiotropic drug resistance ABC transporter
4A	615941151	615942218	TraesCS4A01G331200	Dolichyl-diphosphooligosaccharide--protein glycosyltransferase subunit DAD1
4A	615969199	615971265	TraesCS4A01G331300	Cytochrome b
4A	616086874	616109275	TraesCS4A01G331400	meristematic receptor-like kinase
4A	616229091	616229877	TraesCS4A01G331500	F-box domain containing protein
4A	616230369	616234110	TraesCS4A01G331600	Alcohol dehydrogenase-like protein
4A	616236683	616237678	TraesCS4A01G331700	F-box domain containing protein
4A	616305755	616306168	TraesCS4A01G331800	18S pre-ribosomal assembly protein gar2-like protein
4A	616310241	616313839	TraesCS4A01G331900	Cinnamoyl-CoA reductase 4
4A	616501029	616501661	TraesCS4A01G332000	Serrate RNA effector molecule homolog
4A	616507393	616508992	TraesCS4A01G332100	Nascent polypeptide-associated complex subunit beta
4A	616611347	616612869	TraesCS4A01G332200	F-box and associated interaction domains-containing protein
4A	616617242	616618711	TraesCS4A01G332300	F-box family protein
4A	616662076	616664226	TraesCS4A01G332400	F-box family protein
4A	616673096	616674421	TraesCS4A01G332500	F-box domain containing protein, expressed
4A	616700796	616703444	TraesCS4A01G332600	FBD-associated F-box protein
4A	616839912	616876772	TraesCS4A01G332700	F-box and associated interaction domains-containing protein
4A	616875589	616876473	TraesCS4A01G332800	F-box domain containing protein
4A	616884760	616886057	TraesCS4A01G332900	F-box and associated interaction domains-containing protein
4A	616896068	616897536	TraesCS4A01G333000	F-box family protein
4A	616900752	616903264	TraesCS4A01G333100	F-box family protein
4A	616961344	616961814	TraesCS4A01G333200	Basic blue protein, putative
4A	616977285	616977749	TraesCS4A01G333300	Basic blue protein
4A	616981393	616985103	TraesCS4A01G333400	Transferase, transferring glycosyl groups
4A	617001184	617002438	TraesCS4A01G333500	Sec14p-like phosphatidylinositol transfer family protein
4A	617042496	617050788	TraesCS4A01G333600	Sec14p-like phosphatidylinositol transfer family protein
4A	617049263	617049826	TraesCS4A01G333700	Ethylene-responsive transcription factor
4A	617094599	617097896	TraesCS4A01G333800	Sec14p-like phosphatidylinositol transfer family protein
4A	617230785	617234228	TraesCS4A01G333900	KH domain-containing protein
4A	617281529	617282683	TraesCS4A01G334000	Glycine rich protein 3
4A	617288987	617290506	TraesCS4A01G334100	Glycine rich protein 3
4A	617349130	617350011	TraesCS4A01G334200	Glycine rich protein 3
4A	617360412	617361293	TraesCS4A01G334300	Glycine rich protein 3
4A	617445072	617446375	TraesCS4A01G334400	Integral membrane protein
4A	617652694	617654247	TraesCS4A01G334500	Sucrose transporter
4A	617657626	617659105	TraesCS4A01G334600	U3 small nucleolar RNA-associated protein 18-like protein
4A	617849876	617853865	TraesCS4A01G334700	Actin-related protein 2/3 complex subunit 4
4A	617856078	617859609	TraesCS4A01G334800	B-cell receptor-associated protein 31-like containing protein
4A	617907195	617912173	TraesCS4A01G334900	Protein kinase family protein
4A	617924650	617927527	TraesCS4A01G335000	lectin-receptor kinase
4A	617933919	617940601	TraesCS4A01G335200	Protein kinase family protein
4A	617942110	617944974	TraesCS4A01G335300	RPM1-interacting protein 4
4A	617945575	617951208	TraesCS4A01G335400	Conserved oligomeric Golgi complex subunit 2
4A	618084665	618089234	TraesCS4A01G335500	NBS-LRR disease resistance protein
4A	618121544	618125040	TraesCS4A01G335600	NBS-LRR-like resistance protein
4A	618158574	618175415	TraesCS4A01G335700	receptor kinase 1
4A	618265643	618275366	TraesCS4A01G335800	Ankyrin repeat family protein
4A	618411430	618413166	TraesCS4A01G335900	Pirin-like protein
4A	618417500	618419188	TraesCS4A01G336000	Pirin-like protein
4A	618463034	618464665	TraesCS4A01G336100	Pirin-like protein
4A	618528523	618530057	TraesCS4A01G336200	Pirin-like protein
4A	618564906	618567847	TraesCS4A01G336300	Nuclear RNA binding protein, putative
4A	618620274	618627946	TraesCS4A01G336400	Long-chain-fatty-acid CoA ligase, putative
4A	618660637	618674099	TraesCS4A01G336500	Long-chain-fatty-acid CoA ligase, putative
4A	619147079	619160948	TraesCS4A01G336600	Cleavage and polyadenylation specificity factor subunit 3
4A	619181209	619181706	TraesCS4A01G336700	B3 domain-containing protein
4A	619184361	619188525	TraesCS4A01G336800	Kinase-like protein
4A	619278543	619284761	TraesCS4A01G336900	Ubiquitin carboxyl-terminal hydrolase-related protein
4A	619312282	619312990	TraesCS4A01G337000	CRIB domain-containing protein RIC4
4A	619333716	619334321	TraesCS4A01G337100	CRIB domain-containing protein RIC4
4A	619370063	619370655	TraesCS4A01G337200	ROP-interactive CRIB motif protein
4A	619372946	619375424	TraesCS4A01G337300	UDP-4-amino-4-deoxy-L-arabinose--oxoglutarate aminotransferase
4A	619582736	619583677	TraesCS4A01G337400	U3 small nucleolar RNA-associated protein 18-like protein
4A	619590939	619591567	TraesCS4A01G337500	Serine/threonine-protein phosphatase 7 long form like
4A	619686152	619686415	TraesCS4A01G337600	RING/FYVE/PHD-type zinc finger family protein
4A	619948588	619950250	TraesCS4A01G337700	U3 small nucleolar RNA-associated protein 18-like protein
4A	620189006	620194905	TraesCS4A01G337800	Aspartokinase
4A	620260277	620261490	TraesCS4A01G337900	zinc finger/BTB domain protein, putative (DUF1644)
4A	620289827	620290336	TraesCS4A01G338000	Invertase inhibitor
4A	620323514	620325316	TraesCS4A01G338100	Pectinesterase
4A	620389574	620391835	TraesCS4A01G338200	Ubiquitin carboxyl-terminal hydrolase 2
4A	620430430	620448402	TraesCS4A01G338300	SIGNAL PEPTIDE PEPTIDASE-LIKE 4
4A	620462118	620462879	TraesCS4A01G338400	Sterile alpha motif (SAM) domain-containing protein
4A	620470110	620474109	TraesCS4A01G338500	Phospholipase D
4A	620556284	620558738	TraesCS4A01G338600	Ubiquitin carboxyl-terminal hydrolase 2
4A	620586483	620587013	TraesCS4A01G338700	Chromosome partition protein MukB
4A	620702988	620704712	TraesCS4A01G338800	Cytochrome P450
4A	620778798	620780530	TraesCS4A01G338900	RING/U-box superfamily protein
4A	620932572	620934173	TraesCS4A01G339000	Cytochrome P450
4A	620950816	620952483	TraesCS4A01G339100	Cytochrome P450
4A	621009035	621010495	TraesCS4A01G339200	Expansin
4A	621119082	621125144	TraesCS4A01G339300	CTD small phosphatase-like protein
4A	621128727	621132830	TraesCS4A01G339400	Disease resistance protein (TIR-NBS-LRR class)
4A	621168849	621170039	TraesCS4A01G339500	Dehydrogenase/reductase
4A	621170466	621174698	TraesCS4A01G339600	Mitochondrial carrier protein, putative
4A	621188050	621189669	TraesCS4A01G339700	Glycosyltransferase
4A	621240484	621242129	TraesCS4A01G339800	Glycosyltransferase
4A	621290357	621293334	TraesCS4A01G339900	Glycosyltransferase
4A	621429057	621429710	TraesCS4A01G340000	Pollen allergen Cyn d 23
4A	621470690	621476556	TraesCS4A01G340100	Translation initiation factor 1A
4A	621481108	621481671	TraesCS4A01G340200	Transcriptional factor B3
4A	621506611	621509442	TraesCS4A01G340300	Zinc finger A20 and AN1 domain-containing stress-associated protein 9
4A	621514698	621515420	TraesCS4A01G340400	Erythronate-4-phosphate dehydrogenase family protein
4A	621564032	621567500	TraesCS4A01G340500	ATP-dependent RNA helicase
4A	621661023	621664579	TraesCS4A01G340600	Polyribonucleotide nucleotidyltransferase
4A	621667388	621669013	TraesCS4A01G340700	Leucine--tRNA ligase
4A	621684151	621685071	TraesCS4A01G340800	transmembrane protein, putative (DUF594)
4A	621737852	621741086	TraesCS4A01G340900	Histidine kinase
4A	621767023	621769727	TraesCS4A01G341000	ER lumen protein-retaining receptor
4A	621784935	621792029	TraesCS4A01G341100	Membrane protein insertase YidC
4A	621792794	621793602	TraesCS4A01G341200	DNA helicase INO80-like protein
4A	621796765	621806512	TraesCS4A01G341300	Cytochrome P450
4A	621813131	621815858	TraesCS4A01G341500	GDSL esterase/lipase
4A	621816658	621819172	TraesCS4A01G341600	Serine/threonine protein phosphatase 2A regulatory subunit B
4A	621843012	621849246	TraesCS4A01G341700	Protein kinase-like protein
4A	622121104	622124981	TraesCS4A01G341800	Thiopurine S-methyltransferase family protein, expressed
4A	622126350	622133734	TraesCS4A01G341900	Zinc finger MYND domain-containing protein 15
4A	622162368	622162771	TraesCS4A01G342000	Chaperone protein DnaJ
4A	622173331	622175400	TraesCS4A01G342100	Pentatricopeptide repeat-containing protein
4A	622175640	622179916	TraesCS4A01G342200	Poly(ADP-ribose) glycohydrolase 1
4A	622180127	622181104	TraesCS4A01G342300	Thiopurine S-methyltransferase family protein, expressed
4A	622221480	622227928	TraesCS4A01G342400	Ion channel DMI1
4A	622235590	622238103	TraesCS4A01G342500	Serine/threonine-protein kinase
4A	622275420	622277152	TraesCS4A01G342600	Sister chromatid cohesion protein DCC1
4A	622281851	622286914	TraesCS4A01G342700	Luc7-like protein
4A	622288509	622290306	TraesCS4A01G342800	30S ribosomal protein S6
4A	622439970	622441062	TraesCS4A01G342900	Tropinone reductase-like protein
4A	622484042	622485253	TraesCS4A01G343000	Splicing factor 3B subunit 1
4A	622509024	622510602	TraesCS4A01G343100	Tropinone reductase-like protein
4A	622518435	622519645	TraesCS4A01G343200	Splicing factor 3B subunit 1
4A	623315223	623317668	TraesCS4A01G343300	Late embryogenesis abundant protein Lea14
4A	623318214	623321640	TraesCS4A01G343400	YacP-like NYN domain protein
4A	623326714	623328353	TraesCS4A01G343500	Ras-related protein, expressed
4A	623337815	623340391	TraesCS4A01G343600	F-box family protein
4A	623384786	623386410	TraesCS4A01G343700	Short-chain dehydrogenase/reductase family protein
4A	623400168	623402548	TraesCS4A01G343800	Vacuolar protein sorting-associated protein 9A
4A	623949984	623952202	TraesCS4A01G343900	GrpE protein homolog
4A	623980559	623982801	TraesCS4A01G344000	Charged multivesicular body 1
4A	624014194	624017176	TraesCS4A01G344100	O-methyltransferase
4A	624121271	624122979	TraesCS4A01G344200	Ethylene receptor
4A	624227031	624229801	TraesCS4A01G344300	F-box family protein
4A	624291683	624293216	TraesCS4A01G344400	General transcription factor 2-related zinc finger protein
4A	624298991	624299584	TraesCS4A01G344500	Protein phosphatase 2C
4A	624350460	624351932	TraesCS4A01G344600	Leucine-rich repeat receptor protein kinase family protein
4A	624369585	624371127	TraesCS4A01G344700	Leucine-rich repeat receptor protein kinase family protein
4A	624596862	624597409	TraesCS4A01G344800	Ice recrystallization inhibition protein 2
4A	624614781	624617751	TraesCS4A01G344900	Prohibitin
4A	624733184	624734367	TraesCS4A01G345000	Expansin
4A	624746674	624748142	TraesCS4A01G345100	Expansin
4A	624833586	624834614	TraesCS4A01G345200	Glycosyltransferase
4A	624919171	624921754	TraesCS4A01G345300	Patatin
4A	624925474	624926539	TraesCS4A01G345400	Patatin
4A	624933745	624937337	TraesCS4A01G345500	Protein kinase
4A	624982868	624983686	TraesCS4A01G345600	F-box protein
4A	624991706	624992938	TraesCS4A01G345700	Leucine-rich repeat receptor-like protein kinase
4A	625029910	625030335	TraesCS4A01G345800	Threonine synthase 1, chloroplastic
4A	625076329	625077633	TraesCS4A01G345900	Leucine-rich repeat receptor-like protein kinase
4A	625128444	625129887	TraesCS4A01G346000	Proline synthase co-transcribed bacterial
4A	625164950	625166242	TraesCS4A01G346100	Leucine-rich repeat receptor-like protein kinase
4A	625175675	625177645	TraesCS4A01G346200	F-box protein
4A	625228338	625232830	TraesCS4A01G346300	Prohibitin
4A	625247045	625249102	TraesCS4A01G346500	F-box protein
4A	625249115	625249540	TraesCS4A01G346600	F-box protein
4A	625250695	625253299	TraesCS4A01G346700	F-box family protein
4A	625264346	625265203	TraesCS4A01G346900	Leucine-rich repeat receptor-like protein kinase
4A	625281273	625282133	TraesCS4A01G347000	Leucine-rich repeat receptor-like protein kinase
4A	625321427	625322251	TraesCS4A01G347100	Leucine-rich repeat receptor-like protein kinase
4A	625367240	625368106	TraesCS4A01G347200	Leucine-rich repeat receptor-like protein kinase
4A	625372058	625372726	TraesCS4A01G347300	Leucine-rich repeat receptor-like protein kinase
4A	625394394	625397019	TraesCS4A01G347400	F-box family protein
4A	625406595	625416710	TraesCS4A01G347500	Receptor-like protein kinase
4A	625485292	625488601	TraesCS4A01G347600	Protein kinase family protein
4A	625527371	625530582	TraesCS4A01G347700	MICOS complex subunit Mic10-like protein (DUF543)
4A	625531333	625534526	TraesCS4A01G347800	Phospholipase D
4A	625542286	625543752	TraesCS4A01G347900	F-box and associated interaction domains-containing protein
4A	625652586	625654149	TraesCS4A01G348000	F-box/LRR-repeat protein 2
4A	625685174	625686121	TraesCS4A01G348100	EID1-like F-box protein 2
4A	625761040	625763016	TraesCS4A01G348200	F-box domain containing protein, expressed
4A	625784331	625785581	TraesCS4A01G348300	DUF674 family protein
4A	625829640	625833656	TraesCS4A01G348400	Pentatricopeptide repeat-containing protein
4A	625861956	625864331	TraesCS4A01G348500	Copper ion-binding protein
4A	625883414	625887129	TraesCS4A01G348600	ATP-dependent zinc metalloprotease FTSH protein
4A	625958704	625962221	TraesCS4A01G348700	ATP-dependent zinc metalloprotease FTSH protein
4A	626012052	626014281	TraesCS4A01G348800	ATP-dependent zinc metalloprotease FTSH protein
4A	626013466	626014081	TraesCS4A01G348900	Glycosyl hydrolase superfamily protein
4A	626020387	626023580	TraesCS4A01G349000	ATP-dependent zinc metalloprotease FTSH protein
4A	626063154	626067796	TraesCS4A01G349100	ATP-dependent zinc metalloprotease FTSH protein
4A	626073161	626079486	TraesCS4A01G349200	ATP-dependent zinc metalloprotease FTSH protein
4A	626116348	626119070	TraesCS4A01G349300	BTB/POZ domain-containing protein
4A	626119519	626121612	TraesCS4A01G349400	Protein TolB
4A	626164923	626168610	TraesCS4A01G349500	Aldo/keto reductase family oxidoreductase
4A	626182929	626183790	TraesCS4A01G349600	Ubiquinone biosynthesis monooxygenase COQ6, mitochondrial
4A	626284780	626285886	TraesCS4A01G349700	Glutathione S-transferase
4A	626307415	626329004	TraesCS4A01G349800	receptor kinase 1
4A	626338150	626339452	TraesCS4A01G349900	Disease resistance protein RPM1
4A	626343275	626347359	TraesCS4A01G350000	Trafficking protein particle complex subunit
4A	626385471	626386886	TraesCS4A01G350100	HXXXD-type acyl-transferase family protein
4A	626439527	626443542	TraesCS4A01G350200	Protein DETOXIFICATION
4A	626697440	626698819	TraesCS4A01G350400	Eukaryotic aspartyl protease family protein
4A	626733251	626757319	TraesCS4A01G350500	sequence-specific DNA binding transcription factor ATNDX
4A	626933269	626933817	TraesCS4A01G350600	DNA topoisomerase
4A	626953052	626954768	TraesCS4A01G350700	Glycosyltransferase
4A	626975446	626977650	TraesCS4A01G350800	F-box family protein
4A	626987932	626990304	TraesCS4A01G350900	F-box family protein
4A	627003401	627004432	TraesCS4A01G351000	F-box domain containing protein, expressed
4A	627086902	627087933	TraesCS4A01G351100	F-box domain containing protein, expressed
4A	627166553	627167584	TraesCS4A01G351200	F-box domain containing protein, expressed
4A	627289548	627290869	TraesCS4A01G351300	F-box domain containing protein, expressed
4A	627301571	627302137	TraesCS4A01G351400	F-box family protein
4A	627352107	627352921	TraesCS4A01G351500	arginine N-methyltransferase, putative (DUF688)
4A	627355642	627358542	TraesCS4A01G351600	Receptor-like protein kinase
4A	627360369	627363268	TraesCS4A01G351700	Receptor-like protein kinase
4A	627365174	627367653	TraesCS4A01G351800	Receptor-like protein kinase
4A	627516374	627520725	TraesCS4A01G351900	Kinase family protein
4A	627587833	627593028	TraesCS4A01G352000	Sentrin-specific protease
4A	627772558	627778668	TraesCS4A01G352100	Ubiquinone biosynthesis monooxygenase COQ6, mitochondrial
4A	627813987	627816812	TraesCS4A01G352200	E3 ubiquitin-protein ligase
4A	627819137	627820590	TraesCS4A01G352300	Mitochondrial transcription termination factor family protein
4A	627821412	627823406	TraesCS4A01G352400	transmembrane protein, putative (DUF594)
4A	627917196	627917801	TraesCS4A01G352500	transmembrane protein, putative (DUF594)
4A	627947542	627948896	TraesCS4A01G352600	ATP binding microtubule motor family protein
4A	627969476	627970732	TraesCS4A01G352700	Zinc finger family protein
4A	628083985	628084517	TraesCS4A01G352800	Subtilisin-like protease
4A	628087961	628090344	TraesCS4A01G352900	Ammonium transporter
4A	628209897	628211052	TraesCS4A01G353000	2,3-bisphosphoglycerate-dependent phosphoglycerate mutase
4A	628327437	628328714	TraesCS4A01G353100	Serine/threonine-protein kinase
4A	628328995	628334366	TraesCS4A01G353200	Post-GPI attachment to proteins factor 3
4A	628483735	628486623	TraesCS4A01G353300	Serine/threonine-protein kinase
4A	628490342	628495871	TraesCS4A01G353400	Polyketide cyclase/dehydrase and lipid transporter
4A	628503027	628506980	TraesCS4A01G353500	DNA ligase-like protein
4A	628622824	628624039	TraesCS4A01G353700	Hydroxyproline-rich glycoprotein family protein
4A	628635611	628636884	TraesCS4A01G353800	Hydroxyproline-rich glycoprotein family protein
4A	628692935	628693912	TraesCS4A01G353900	Chaperone protein dnaJ
4A	628698541	628699736	TraesCS4A01G354000	Serine/threonine transporter SstT
4A	628848441	628851249	TraesCS4A01G354100	basic helix-loop-helix (bHLH) DNA-binding superfamily protein
4A	628899826	628909852	TraesCS4A01G354200	U3 small nucleolar RNA-associated protein 25
4A	628925670	628928063	TraesCS4A01G354300	Pentatricopeptide repeat-containing protein
4A	628929091	628931224	TraesCS4A01G354400	F-box family protein
4A	628937630	628944871	TraesCS4A01G354500	Nicotinate phosphoribosyltransferase, putative, expressed
4A	628950731	628951945	TraesCS4A01G354600	ABC transporter family protein
4A	629034391	629106268	TraesCS4A01G354700	ATP-binding cassette transporter, putative
4A	629110482	629121456	TraesCS4A01G354800	Cytochrome P450
4A	629292193	629294170	TraesCS4A01G354900	F-box protein At3g18320
4A	629360623	629365668	TraesCS4A01G355000	Cellulose synthase
4A	629373681	629378981	TraesCS4A01G355100	mRNA-decapping enzyme-like protein
4A	629391843	629392483	TraesCS4A01G355200	Ferredoxin
4A	629423071	629424402	TraesCS4A01G355300	IAA-amino acid hydrolase ILR1
4A	629433783	629436341	TraesCS4A01G355400	IAA-amino acid hydrolase ILR1
4A	629456416	629461395	TraesCS4A01G355500	Harpin-induced protein
4A	629466744	629468423	TraesCS4A01G355600	Photosystem II reaction center Psb28 protein
4A	629474797	629475953	TraesCS4A01G355700	RNA-binding protein
4A	629477329	629478980	TraesCS4A01G355800	Cytochrome P450 family protein
4A	629486288	629487331	TraesCS4A01G355900	Transcription factor, putative
4A	629857252	629860741	TraesCS4A01G356100	Actin
4A	629862606	629865014	TraesCS4A01G356200	Ferredoxin
4A	629867452	629874469	TraesCS4A01G356300	Kelch repeat-containing family protein
4A	629911234	629917590	TraesCS4A01G356400	Acyl-CoA-binding domain-containing protein 4
4A	629935770	629936684	TraesCS4A01G356600	Myb/SANT-like DNA-binding domain protein
4A	629937635	629941229	TraesCS4A01G356700	Vang-like protein 2
4A	629948227	629948514	TraesCS4A01G356800	tRNA-2-methylthio-N(6)-dimethylallyladenosine synthase
4A	630040989	630042260	TraesCS4A01G356900	F-box like protein
4A	630613074	630613319	TraesCS4A01G357000	NADH-ubiquinone oxidoreductase 20.9 kDa subunit
4A	630758795	630771432	TraesCS4A01G357100	DNA-directed RNA polymerase subunit
4A	630772220	630775457	TraesCS4A01G357200	Electron transfer flavoprotein subunit alpha, mitochondrial
4A	630845980	630860277	TraesCS4A01G357300	Kinesin-like protein
4A	630863780	630864288	TraesCS4A01G357400	Wound-responsive family protein
4A	630876564	630878088	TraesCS4A01G357500	B3 domain-containing protein
4A	630897930	630899225	TraesCS4A01G357600	B3 domain-containing protein
4A	631210954	631225371	TraesCS4A01G357700	Receptor-like protein kinase
4A	631376100	631377338	TraesCS4A01G357800	Transcriptional regulatory protein WalR
4A	631475912	631477601	TraesCS4A01G357900	B3 domain-containing protein
4A	631494247	631495802	TraesCS4A01G358000	B3 domain-containing protein
4A	631566413	631576207	TraesCS4A01G358100	Sentrin-specific protease
4A	631577529	631579059	TraesCS4A01G358200	Cytochrome P450, putative
4A	631620139	631620892	TraesCS4A01G358300	Laccase
4A	631642144	631645788	TraesCS4A01G358400	Translocase of chloroplast 159, chloroplastic
4A	631900053	631901517	TraesCS4A01G358500	Glucan endo-1,3-beta-glucosidase 1
4A	631902152	631904694	TraesCS4A01G358600	RNA 3-terminal phosphate cyclase-like protein
4A	631921291	631924636	TraesCS4A01G358700	Pectin lyase-like superfamily protein
4A	631925522	631927918	TraesCS4A01G358800	Deaminase-related family protein
4A	631952805	631953987	TraesCS4A01G358900	Deaminase-related family protein
4A	631957060	631962541	TraesCS4A01G359000	Flap endonuclease 1
4A	631964516	631965881	TraesCS4A01G359100	Haloacid dehalogenase-like hydrolase family protein
4A	632153657	632155327	TraesCS4A01G359200	Threonine--tRNA ligase
4A	632615727	632617807	TraesCS4A01G359300	F-box family protein
4A	632733422	632735692	TraesCS4A01G359400	Leucine-rich repeat receptor-like protein kinase family protein
4A	632858395	632864043	TraesCS4A01G359500	Squamosa promoter-binding protein, putative
4A	632939984	632940735	TraesCS4A01G359700	F-box domain containing protein, expressed
4A	632943976	632951269	TraesCS4A01G359800	Lipoxygenase
4A	632989683	632991293	TraesCS4A01G359900	Phosphate transporter protein
4A	632998265	632999875	TraesCS4A01G360000	Phosphate transporter protein
4A	633066696	633070722	TraesCS4A01G360100	ARM repeat superfamily protein
4A	633074090	633076839	TraesCS4A01G360200	Pentatricopeptide repeat-containing protein
4A	633426072	633426399	TraesCS4A01G360300	NADH-ubiquinone oxidoreductase chain 1
4A	633447667	633449869	TraesCS4A01G360400	HhH-GPD base excision DNA repair family protein
4A	633468260	633468745	TraesCS4A01G360500	NADH-ubiquinone oxidoreductase chain 1
4A	633686853	633687338	TraesCS4A01G360600	NADH-ubiquinone oxidoreductase chain 1
4A	634393500	634398675	TraesCS4A01G360700	tRNA:m(4)X modification enzyme TRM13-like protein
4A	634418137	634420706	TraesCS4A01G360800	Cytochrome P450
4A	634450406	634452975	TraesCS4A01G360900	Cytochrome P450
4A	634508985	634509788	TraesCS4A01G361000	Short-chain dehydrogenase/reductase
4A	634733450	634738598	TraesCS4A01G361100	Protein kinase
4A	634742342	634742936	TraesCS4A01G361200	RNA-binding (RRM/RBD/RNP motifs) family protein
4A	634837164	634841936	TraesCS4A01G361300	Chaperone protein dnaJ
4A	634843982	634847614	TraesCS4A01G361400	Glycerol-3-phosphate acyltransferase 3, putative
4A	635274054	635275684	TraesCS4A01G361500	Growth-regulating factor
4A	635301721	635303306	TraesCS4A01G361600	Growth-regulating factor
4A	635724501	635726276	TraesCS4A01G361700	growth-regulating factor 8
4A	635847365	635849401	TraesCS4A01G361800	COP1-interacting protein 4.1
4A	635928026	635934065	TraesCS4A01G361900	Galactokinase
4A	635959443	635965086	TraesCS4A01G362000	BTB/POZ domain-containing family protein
4A	636034471	636037588	TraesCS4A01G362100	BTB/POZ/Kelch-associated protein
4A	636067205	636078576	TraesCS4A01G362200	BTB/POZ domain-containing family protein
4A	636083360	636085325	TraesCS4A01G362300	BTB/POZ domain-containing family protein
4A	636099803	636104763	TraesCS4A01G362400	BTB/POZ domain-containing family protein
4A	636113048	636113803	TraesCS4A01G362500	BTB/POZ domain-containing protein POB1
4A	636216194	636216508	TraesCS4A01G362600	UDP-N-acetylglucosamine--N-acetylmuramyl-(pentapeptide) pyrophosphoryl-undecaprenol N-acetylglucosamine transferase
4A	636258876	636261025	TraesCS4A01G362700	BTB/POZ domain-containing protein
4A	636313715	636341140	TraesCS4A01G362800	BTB/POZ domain-containing family protein
4A	636323893	636324201	TraesCS4A01G362900	transmembrane protein
4A	636376422	636377042	TraesCS4A01G363000	Oxygen-dependent coproporphyrinogen-III oxidase
4A	636573130	636580104	TraesCS4A01G363100	Acetyl-CoA carboxylase
4A	636640832	636643721	TraesCS4A01G363200	B3 domain-containing protein
4A	636646895	636654922	TraesCS4A01G363300	Nucleic acid-binding proteins superfamily
4A	636656163	636658658	TraesCS4A01G363400	Protein phosphatase 2c, putative
4A	636661306	636664238	TraesCS4A01G363500	Huntingtin interacting protein K
4A	636668127	636669020	TraesCS4A01G363600	Protein TolB
4A	636677630	636680816	TraesCS4A01G363700	Elongation factor
4A	636684721	636687792	TraesCS4A01G363800	Elongation factor
4A	636962452	636964425	TraesCS4A01G363900	Elongation factor G
4A	636978671	636981364	TraesCS4A01G364000	Calreticulin
4A	637534368	637534931	TraesCS4A01G364100	Dihydropterin pyrophosphokinase / Dihydropteroate synthase
4A	637737464	637740945	TraesCS4A01G364200	GPI-anchored adhesin-like protein
4A	637893136	637897332	TraesCS4A01G364300	GPI-anchored adhesin-like protein
4A	637920996	637923967	TraesCS4A01G364400	Phosphoribosylformylglycinamidine cyclo-ligase
4A	637929625	637929873	TraesCS4A01G364500	DUF3511 domain protein
4A	637931444	637934944	TraesCS4A01G364600	DUF789 family protein
4A	637965988	637966751	TraesCS4A01G364700	GATA transcription factor, putative
4A	638169511	638174692	TraesCS4A01G364800	Pumilio
4A	638213514	638218791	TraesCS4A01G364900	Pumilio domain-containing-like protein
4A	638220812	638222324	TraesCS4A01G365000	Chaperone DnaJ
4A	638240325	638241099	TraesCS4A01G365100	SHAGGY-like kinase
4A	638791957	638796803	TraesCS4A01G365200	Sn1-specific diacylglycerol lipase alpha
4A	638802544	638803095	TraesCS4A01G365300	Plant invertase/pectin methylesterase inhibitor
4A	639025347	639025955	TraesCS4A01G365400	Pectin methylesterase inhibitor
4A	639041181	639041989	TraesCS4A01G365500	Protein PLANT CADMIUM RESISTANCE 2
4A	639043129	639048804	TraesCS4A01G365600	Protein PLANT CADMIUM RESISTANCE 2
4A	639055486	639056065	TraesCS4A01G365700	Protein PLANT CADMIUM RESISTANCE 2
4A	639073074	639073730	TraesCS4A01G365800	Invertase/pectin methylesterase inhibitor family protein
4A	639183830	639185015	TraesCS4A01G365900	Leucine-rich repeat (LRR) family protein
4A	639195944	639199853	TraesCS4A01G366000	Epoxide hydrolase 2
4A	639202474	639205236	TraesCS4A01G366100	Epoxide hydrolase 2
4A	639205670	639209134	TraesCS4A01G366200	Fumarylacetoacetate hydrolase, putative
4A	639376010	639383846	TraesCS4A01G366300	F-box family protein
4A	639977555	639978049	TraesCS4A01G366400	SKP1-like protein
4A	639986173	639986958	TraesCS4A01G366500	F-box family protein
4A	639993484	639997436	TraesCS4A01G366600	F-box family protein
4A	640002522	640006556	TraesCS4A01G366700	F-box family protein
4A	640049673	640050809	TraesCS4A01G366800	Paired amphipathic helix protein Sin3
4A	640056919	640058334	TraesCS4A01G366900	F-box domain containing protein
4A	640154526	640155157	TraesCS4A01G367000	NAD kinase
4A	640175194	640177744	TraesCS4A01G367100	Methyltransferase family protein
4A	640212737	640216328	TraesCS4A01G367200	SPX domain-containing family protein
4A	640232231	640233083	TraesCS4A01G367300	High affinity nitrate transporter
4A	640234711	640237847	TraesCS4A01G367400	Late embryogenesis abundant hydroxyproline-rich glycoprotein
4A	640249308	640252835	TraesCS4A01G367500	Organic solute transporter-like
4A	640804606	640812287	TraesCS4A01G367600	ATP-dependent DNA helicase
4A	640916508	640916894	TraesCS4A01G367800	MATE efflux family protein
4A	640922121	640922483	TraesCS4A01G367900	Root hair defective 3 GTP-binding protein (RHD3)
4A	640935724	640936834	TraesCS4A01G368000	Extracellular matrix-binding protein ebh
4A	641000229	641000627	TraesCS4A01G368100	Glycosyltransferase
4A	641250673	641255293	TraesCS4A01G368200	RING/FYVE/PHD zinc finger protein, putative
4A	641290836	641294901	TraesCS4A01G368300	Cation/H(+) antiporter
4A	641295623	641297885	TraesCS4A01G368400	Armadillo repeat-containing protein 8
4A	641359589	641359939	TraesCS4A01G368500	Bifunctional polymyxin resistance protein ArnA
4A	641382143	641383810	TraesCS4A01G368600	Mannan endo-1,4-beta-mannosidase 4
4A	641400899	641401733	TraesCS4A01G368700	Pre-mRNA-splicing factor CWC21
4A	641402978	641404973	TraesCS4A01G368800	50S ribosomal protein L18
4A	641416792	641417596	TraesCS4A01G368900	DNA polymerase epsilon catalytic subunit A, putative
4A	641419023	641419583	TraesCS4A01G369000	E3 ubiquitin-protein ligase
4A	641442323	641442892	TraesCS4A01G369100	Dirigent protein
4A	641451084	641452850	TraesCS4A01G369200	Glutamate decarboxylase
4A	641480727	641481556	TraesCS4A01G369300	DNA polymerase epsilon catalytic subunit A, putative
4A	641502472	641502912	TraesCS4A01G369400	VQ motif family protein, expressed
4A	641504512	641508088	TraesCS4A01G369500	Non specific phospholipase C
4A	641507108	641508163	TraesCS4A01G369600	Proteasome subunit beta type-5
4A	641576696	641577250	TraesCS4A01G369700	Invertase/pectin methylesterase inhibitor family protein
4A	641579479	641580042	TraesCS4A01G369800	Invertase/pectin methylesterase inhibitor family protein
4A	641588615	641589175	TraesCS4A01G369900	Invertase/pectin methylesterase inhibitor family protein
4A	641591691	641597286	TraesCS4A01G370000	WD-repeat protein, putative
4A	641599687	641600376	TraesCS4A01G370100	N-acetyltransferase
4A	641602488	641602763	TraesCS4A01G370200	Pyridoxal phosphate (PLP)-dependent transferases superfamily protein
4A	641610693	641610974	TraesCS4A01G370300	Protoheme IX farnesyltransferase
4A	642186330	642186605	TraesCS4A01G370400	Avr9/Cf-9 rapidly elicited protein
4A	642210148	642213722	TraesCS4A01G370500	ABC transporter G family member
4A	642284232	642290242	TraesCS4A01G370600	ABC transporter B family protein
4A	642365326	642365630	TraesCS4A01G370700	Avr9/Cf-9 rapidly elicited protein
4A	642508649	642508909	TraesCS4A01G370800	Protein NRT1/ PTR FAMILY 4.4
4A	642828515	642829993	TraesCS4A01G370900	transmembrane protein, putative (DUF247)
4A	642903155	642903419	TraesCS4A01G371000	Avr9/Cf-9 rapidly elicited protein
4A	643998670	644002453	TraesCS4A01G371100	Receptor-like protein kinase
4A	644770948	644772416	TraesCS4A01G371200	Anthocyanin 3'-O-beta-glucosyltransferase
4A	644922447	644922845	TraesCS4A01G371300	Signal recognition particle 14 kDa protein
4A	645401503	645404918	TraesCS4A01G371400	tRNA-modifying protein YgfZ
4A	645409953	645411293	TraesCS4A01G371500	Anthocyanin 3'-O-beta-glucosyltransferase
4A	645420263	645423398	TraesCS4A01G371600	Myeloid leukemia factor 1
4A	646293199	646294155	TraesCS4A01G371700	Cysteine proteinase
4A	646312265	646317821	TraesCS4A01G371800	Methionine aminopeptidase 2
4A	646619520	646619984	TraesCS4A01G371900	Beta-1,3-N-Acetylglucosaminyltransferase family protein, putative
4A	646775458	646788078	TraesCS4A01G372100	ABC transporter family protein
4A	647087666	647093572	TraesCS4A01G372200	ATP-dependent DNA helicase DDM1
4A	647098868	647100333	TraesCS4A01G372300	NB-ARC domain-containing disease resistance protein
4A	647178451	647182625	TraesCS4A01G372400	Pre-mRNA-splicing factor CWC26
4A	647194421	647219850	TraesCS4A01G372500	Kinesin light chain 3
4A	647276847	647279733	TraesCS4A01G372600	Hypersensitive-induced response protein
4A	647320051	647321491	TraesCS4A01G372700	F-box domain containing protein
4A	647863453	647864144	TraesCS4A01G372800	Acetyl-coenzyme A carboxylase carboxyl transferase subunit beta, chloroplastic
4A	648133492	648134029	TraesCS4A01G372900	Senescence-associated protein, putative
4A	648260908	648261682	TraesCS4A01G373000	Senescence-associated protein, putative
4A	648463140	648463896	TraesCS4A01G373100	B3 domain-containing protein
4A	648654225	648654684	TraesCS4A01G373200	Senescence-associated protein, putative
4A	648784545	648785102	TraesCS4A01G373300	Invertase/pectin methylesterase inhibitor family protein
4A	648794180	648795295	TraesCS4A01G373400	F-box family protein
4A	648874481	648876534	TraesCS4A01G373500	Flavin-containing monooxygenase, putative
4A	648880642	648882633	TraesCS4A01G373600	Actin cross-linking protein, putative
4A	648890584	648893376	TraesCS4A01G373700	Cornichon family protein
4A	648894037	648897123	TraesCS4A01G373800	Enolase
4A	648946608	648948259	TraesCS4A01G373900	rRNA N-glycosidase
4A	648950305	648950868	TraesCS4A01G374000	UBX domain-containing protein
4A	649007564	649009222	TraesCS4A01G374200	Flavin-containing monooxygenase
4A	649145365	649147026	TraesCS4A01G374300	Flavin-containing monooxygenase
4A	649174843	649175944	TraesCS4A01G374400	Flavin-containing monooxygenase
4A	649184575	649186878	TraesCS4A01G374500	Flavin-containing monooxygenase
4A	649202601	649206342	TraesCS4A01G374600	ATP-dependent Clp protease proteolytic subunit
4A	649428109	649429167	TraesCS4A01G374700	AT hook motif DNA-binding family protein
4A	649803437	649811552	TraesCS4A01G375000	Kinesin-like protein
4A	649894146	649897730	TraesCS4A01G375100	Transcription initiation factor TFIID subunit 14b
4A	649899315	649902628	TraesCS4A01G375200	Mitochondrial metalloendopeptidase OMA1
4A	649905050	649908415	TraesCS4A01G375300	Mitochondrial metalloendopeptidase OMA1
4A	650041729	650045912	TraesCS4A01G375400	Mitochondrial metalloendopeptidase OMA1
4A	650058657	650059016	TraesCS4A01G375500	Auxin responsive SAUR protein
4A	650066863	650072409	TraesCS4A01G375600	Ribosome production factor 1
4A	650074530	650075405	TraesCS4A01G375700	Core-2/I-branching beta-1,6-N-acetylglucosaminyltransferase family protein
4A	650303289	650305729	TraesCS4A01G375800	transmembrane protein, putative (DUF594)
4A	650311820	650314357	TraesCS4A01G375900	Serine/threonine-protein kinase
4A	650368006	650369391	TraesCS4A01G376000	Ribosome-binding factor A
4A	650373691	650375926	TraesCS4A01G376100	Cytochrome P450 family protein, expressed
4A	650599016	650602015	TraesCS4A01G376200	NBS-LRR disease resistance protein, putative, expressed
4A	650657613	650660090	TraesCS4A01G376300	Lysosomal-associated transmembrane protein 4A
4A	650846318	650847661	TraesCS4A01G376400	F-box domain containing protein
4A	650870908	650872041	TraesCS4A01G376500	GDP-mannose 4,6 dehydratase-like protein
4A	651347391	651351632	TraesCS4A01G376600	Protein DJ-1
4A	651365942	651370213	TraesCS4A01G376700	Nitrate reductase
4A	651568140	651569615	TraesCS4A01G376800	RING/U-box superfamily protein
4A	651623785	651628027	TraesCS4A01G376900	bZIP transcription factor, putative (DUF630 and DUF632)
4A	651637545	651638361	TraesCS4A01G377000	Potassium channel toxin alpha-KTx 2.2
4A	651985464	651985862	TraesCS4A01G377100	S-locus cysteine-rich protein (SCR)
4A	652184850	652187702	TraesCS4A01G377300	Histidine kinase-, DNA gyrase B-, and HSP90-like ATPase family protein
4A	652849610	652857706	TraesCS4A01G377500	Ras GTPase-activating protein-binding protein 1
4A	653073897	653076726	TraesCS4A01G377600	RING/U-box superfamily protein
4A	653959382	653960644	TraesCS4A01G377700	3'-N-debenzoyl-2'-deoxytaxol N-benzoyltransferase
4A	654057318	654059682	TraesCS4A01G377800	RING/U-box superfamily protein
4A	655251401	655254942	TraesCS4A01G377900	Transcription factor GTE1
4A	655255412	655257746	TraesCS4A01G378000	Serine/threonine-protein phosphatase 4 regulatory subunit 3
4A	655259075	655260655	TraesCS4A01G378100	Peptide methionine sulfoxide reductase MsrA
4A	655262326	655264194	TraesCS4A01G378200	Pentatricopeptide repeat-containing protein
4A	655432448	655436590	TraesCS4A01G378300	2-oxoglutarate (2OG) and Fe(II)-dependent oxygenase-like protein
4A	655624000	655627287	TraesCS4A01G378400	RNA polymerase II transcription mediator
4A	656030011	656031156	TraesCS4A01G378500	F-box family protein
4A	656149091	656150358	TraesCS4A01G378600	Werner Syndrome-like exonuclease
4A	656249761	656250309	TraesCS4A01G378700	F-box and associated interaction domains-containing protein
4A	656250415	656250909	TraesCS4A01G378800	F-box domain containing protein, expressed
4A	656480235	656481155	TraesCS4A01G378900	F-box family protein
4A	656498312	656499454	TraesCS4A01G379000	F-box family protein
4A	656707892	656708563	TraesCS4A01G379100	F-box family protein
4A	656747713	656748615	TraesCS4A01G379200	F-box family protein
4A	656856024	656857577	TraesCS4A01G379300	S-adenosyl-L-methionine-dependent methyltransferases superfamily protein
4A	657064635	657066429	TraesCS4A01G379400	Peroxidase
4A	657096985	657097854	TraesCS4A01G379500	receptor like protein 16
4A	657097520	657099853	TraesCS4A01G379600	Receptor-kinase, putative
4A	657195116	657196474	TraesCS4A01G379700	SKP1-like protein
4A	657201005	657204258	TraesCS4A01G379800	Receptor-kinase, putative
4A	657307837	657309488	TraesCS4A01G379900	Flavin-containing monooxygenase
4A	657367531	657369181	TraesCS4A01G380000	Flavin-containing monooxygenase
4A	657488762	657491257	TraesCS4A01G380100	Coiled-coil domain-containing protein 97
4A	657497262	657498708	TraesCS4A01G380200	Acid phosphatase 1
4A	657499067	657502203	TraesCS4A01G380300	Receptor-like protein kinase
4A	657666413	657666559	TraesCS4A01G380400	transmembrane protein
4A	657950999	657952810	TraesCS4A01G380500	23S rRNA (uracil(747)-C(5))-methyltransferase RlmC
4A	658223660	658226015	TraesCS4A01G380600	U4/U6 small nuclear ribonucleoprotein Prp3
4A	658343196	658344069	TraesCS4A01G380700	Sphingoid base hydroxylase 2
4A	658351765	658352482	TraesCS4A01G380800	DUF1685 family protein
4A	658381714	658382028	TraesCS4A01G380900	NBS-LRR disease resistance protein, putative
4A	658608620	658609447	TraesCS4A01G381000	C3HC zinc finger-like, putative isoform 2
4A	658825356	658825959	TraesCS4A01G381100	Receptor-like protein kinase
4A	658897298	658898168	TraesCS4A01G381200	sphingoid base hydroxylase 2
4A	658921865	658922582	TraesCS4A01G381300	DUF1685 family protein
4A	658950350	658955375	TraesCS4A01G381400	Ankyrin repeat protein-like
4A	658956999	658961990	TraesCS4A01G381500	Proteasome subunit beta type
4A	658964415	658968365	TraesCS4A01G381600	NBS-LRR disease resistance protein-like protein
4A	658970202	658975179	TraesCS4A01G381700	Leucine carboxyl methyltransferase family protein-like
4A	659014737	659017256	TraesCS4A01G381800	CsAtPR5, putative, expressed
4A	659087787	659089585	TraesCS4A01G381900	CsAtPR5, putative, expressed
4A	659125159	659129636	TraesCS4A01G382000	cDNA clone:J033110D02, full insert sequence
4A	660001381	660002731	TraesCS4A01G382100	Werner Syndrome-like exonuclease
4A	660452213	660453124	TraesCS4A01G382200	Homeobox leucine zipper protein
4A	660624461	660625424	TraesCS4A01G382300	Homeobox-leucine zipper family protein
4A	660653849	660655014	TraesCS4A01G382400	Homeobox-leucine zipper protein
4A	660753418	660755790	TraesCS4A01G382500	F-box protein
4A	660767286	660768491	TraesCS4A01G382600	F-box protein
4A	660790443	660795818	TraesCS4A01G382700	Kinase family protein
4A	660877118	660877834	TraesCS4A01G382800	Late embryogenesis abundant (LEA)hydroxyproline-rich glycoprotein family
4A	660916378	660922098	TraesCS4A01G382900	Kinase family protein
4A	660923030	660926301	TraesCS4A01G383000	Protein kinase
4A	660984847	660986027	TraesCS4A01G383100	O-methyltransferase family protein, expressed
4A	661020969	661022548	TraesCS4A01G383200	F-box family protein
4A	661049468	661050747	TraesCS4A01G383300	O-methyltransferase family protein, expressed
4A	661121086	661143990	TraesCS4A01G383400	O-methyltransferase family protein, expressed
4A	661142960	661143526	TraesCS4A01G383500	O-methyltransferase family protein, expressed
4A	661279447	661280748	TraesCS4A01G383600	F-box family protein
4A	661301452	661301646	TraesCS4A01G383700	tRNA pseudouridine synthase A
4A	661624066	661624614	TraesCS4A01G383800	DNA topoisomerase
4A	661820076	661821337	TraesCS4A01G383900	Telomere repeat-binding factor like-protein
4A	661827403	661827741	TraesCS4A01G384000	NHL domain-containing protein, putative
4A	661969538	661969870	TraesCS4A01G384100	NHL domain-containing protein, putative
4A	661973722	661974054	TraesCS4A01G384200	NHL domain protein
4A	662051838	662052500	TraesCS4A01G384300	ATP-dependent zinc metalloprotease FtsH
4A	662131695	662132158	TraesCS4A01G384400	GRF zinc finger family protein
4A	662147700	662149730	TraesCS4A01G384500	Lectin receptor kinase
4A	662200443	662202443	TraesCS4A01G384600	Lectin receptor kinase
4A	662231801	662233666	TraesCS4A01G384700	Cytochrome P450
4A	662278609	662291897	TraesCS4A01G384800	Pleiotropic drug resistance ABC transporter
4A	662325114	662326655	TraesCS4A01G384900	Sugar transporter, putative
4A	662456793	662458262	TraesCS4A01G385100	P-loop containing nucleoside triphosphate hydrolases superfamily protein
4A	662519719	662520195	TraesCS4A01G385200	RING/U-box superfamily protein
4A	662566397	662568233	TraesCS4A01G385300	Cytochrome P450
4A	662619795	662620713	TraesCS4A01G385400	Cysteine protease, putative
4A	662624794	662626559	TraesCS4A01G385500	UDP-glycosyltransferase
4A	662816111	662816770	TraesCS4A01G385700	Pectate lyase
4A	662960105	662960914	TraesCS4A01G385800	RING/U-box superfamily protein
4A	663202900	663203776	TraesCS4A01G385900	RING/U-box superfamily protein, putative
4A	663211612	663212206	TraesCS4A01G386000	Ubiquitin-conjugating enzyme 23 isoform 2
4A	663276787	663282956	TraesCS4A01G386100	Elongation factor 4
4A	663284411	663290346	TraesCS4A01G386200	Carboxypeptidase
4A	663695041	663695847	TraesCS4A01G386300	2-oxoglutarate (2OG) and Fe(II)-dependent oxygenase superfamily protein
4A	663986138	663987046	TraesCS4A01G386400	Auxin repressed/dormancy associated protein
4A	664153087	664154299	TraesCS4A01G386500	Auxin repressed/dormancy associated protein
4A	664228761	664230665	TraesCS4A01G386600	Polygalacturonase-1 non-catalytic beta subunit
4A	664241012	664242594	TraesCS4A01G386700	WAT1-related protein
4A	664443438	664446087	TraesCS4A01G386800	B3 domain-containing protein
4A	664478014	664481349	TraesCS4A01G386900	Pentatricopeptide repeat-containing protein, putative
4A	664484166	664488638	TraesCS4A01G387000	ATP-dependent 6-phosphofructokinase
4A	664501606	664503228	TraesCS4A01G387200	E3 ubiquitin-protein ligase SINA-like 10
4A	664929254	664929517	TraesCS4A01G387300	Pyridoxine/pyridoxamine 5'-phosphate oxidase
4A	665182616	665182930	TraesCS4A01G387400	Small ubiquitin-related modifier
4A	665317346	665318851	TraesCS4A01G387500	Eukaryotic aspartyl protease family protein
4A	665438843	665440261	TraesCS4A01G387600	Eukaryotic aspartyl protease family protein
4A	665501063	665504247	TraesCS4A01G387700	Acyl-[acyl-carrier-protein] hydrolase
4A	665601463	665603763	TraesCS4A01G387800	Pentatricopeptide repeat-containing protein
4A	665606121	665609275	TraesCS4A01G387900	Pre-mRNA splicing factor PRP38 family protein
4A	665624312	665628764	TraesCS4A01G388000	Sulfate transporter
4A	665634755	665636796	TraesCS4A01G388100	Peptidyl-prolyl cis-trans isomerase
4A	665864982	665873428	TraesCS4A01G388200	Coatomer subunit beta-like protein
4A	665925608	665929131	TraesCS4A01G388300	DNA repair protein XRCC1
4A	666057584	666061533	TraesCS4A01G388400	Fertilization independent endosperm 1 protein
4A	666114374	666117770	TraesCS4A01G388500	Receptor protein kinase, putative
4A	666149057	666151389	TraesCS4A01G388600	Fatty acyl-CoA reductase
4A	666482622	666484571	TraesCS4A01G388700	Carbonic anhydrase
4A	666538777	666540410	TraesCS4A01G388900	Carbonic anhydrase
4A	666637078	666641930	TraesCS4A01G389000	Peroxidase
4A	666811850	666813491	TraesCS4A01G389100	Carbonic anhydrase
4A	666923506	666927573	TraesCS4A01G389200	Carbonic anhydrase
4A	666938286	666940608	TraesCS4A01G389300	Phosphomannomutase
4A	666947338	666949278	TraesCS4A01G389400	Leucine-rich repeat receptor-like protein kinase family protein
4A	666949303	666952836	TraesCS4A01G389500	receptor kinase 1
4A	666980143	666983528	TraesCS4A01G389600	Disease resistance protein RPM1
4A	666983563	666984354	TraesCS4A01G389700	Disease resistance protein RPM1
4A	667062511	667063724	TraesCS4A01G389800	Gamma-aminobutyric acid receptor subunit gamma-2
4A	667174307	667174986	TraesCS4A01G389900	Gamma-aminobutyric acid receptor subunit gamma-2
4A	667225463	667226800	TraesCS4A01G390000	Gamma-aminobutyric acid receptor subunit gamma-2
4A	667330849	667331742	TraesCS4A01G390100	Gamma-aminobutyric acid receptor subunit gamma-2
4A	667344888	667346497	TraesCS4A01G390200	Gamma-aminobutyric acid receptor subunit gamma-2
4A	667349594	667351134	TraesCS4A01G390300	Superoxide dismutase
4A	667352170	667355327	TraesCS4A01G390400	Protein arginine methyltransferase
4A	667380048	667381208	TraesCS4A01G390500	Mitochondrial transcription termination factor-like
4A	667425334	667426494	TraesCS4A01G390600	Mitochondrial transcription termination factor-like
4A	667848713	667852056	TraesCS4A01G390700	F-box family protein
4A	667852919	667855180	TraesCS4A01G390800	Cytochrome c oxidase subunit 5B, mitochondrial
4A	667856077	667857450	TraesCS4A01G390900	Kinase family protein
4A	667858921	667862879	TraesCS4A01G391000	Protein kinase
4A	668083351	668088933	TraesCS4A01G391100	Protein kinase
4A	668093684	668096362	TraesCS4A01G391200	Protein kinase
4A	668109189	668110372	TraesCS4A01G391300	wall-associated receptor kinase-like protein
4A	668146294	668151369	TraesCS4A01G391400	Protein kinase
4A	668152757	668154253	TraesCS4A01G391500	Leucine-rich repeat receptor-like protein kinase family protein
4A	668160224	668162728	TraesCS4A01G391600	Protein kinase
4A	668167470	668168000	TraesCS4A01G391700	Early nodulin 93
4A	668278081	668285854	TraesCS4A01G391900	Early nodulin 93
4A	668285123	668285676	TraesCS4A01G392000	Early nodulin 93
4A	668288039	668288543	TraesCS4A01G392100	Early nodulin 93
4A	668306142	668306646	TraesCS4A01G392200	Early nodulin 93
4A	668319095	668319614	TraesCS4A01G392300	Early nodulin 93
4A	668323525	668324371	TraesCS4A01G392400	Early nodulin 93
4A	668336829	668337495	TraesCS4A01G392500	Early nodulin 93
4A	668351804	668352651	TraesCS4A01G392600	Early nodulin 93
4A	668367845	668370067	TraesCS4A01G392700	aspartate/glutamate/uridylate kinase family protein
4A	668440694	668443734	TraesCS4A01G392800	Chalcone synthase
4A	668640863	668641195	TraesCS4A01G392900	S-adenosyl-L-methionine-dependent methyltransferases superfamily protein
4A	668645049	668646155	TraesCS4A01G393000	Light-independent protochlorophyllide reductase subunit B
4A	668747192	668751479	TraesCS4A01G393100	Acetyl-coenzyme A synthetase
4A	668852848	668854149	TraesCS4A01G393200	Alpha/beta-Hydrolases superfamily protein
4A	669044239	669044940	TraesCS4A01G393300	Kinesin-1 heavy chain
4A	669234934	669236596	TraesCS4A01G393400	Cell division cycle protein 123
4A	669239369	669240881	TraesCS4A01G393500	Acyl-CoA-binding protein
4A	669316246	669319924	TraesCS4A01G393600	GDT1-like protein
4A	669382089	669382550	TraesCS4A01G393700	Disease resistance protein RPM1
4A	669383551	669385176	TraesCS4A01G393800	Disease resistance protein RPM1
4A	669431042	669431491	TraesCS4A01G393900	Coiled-coil protein
4A	669440595	669446440	TraesCS4A01G394100	Methionine S-methyltransferase
4A	669456193	669458349	TraesCS4A01G394200	Protein kinase
4A	669578366	669582659	TraesCS4A01G394300	Acetyl-coenzyme A synthetase
4A	669672899	669673851	TraesCS4A01G394400	Zinc finger (Ran-binding) family protein
4A	669677395	669680376	TraesCS4A01G394500	Nudix hydrolase
4A	669820474	669823445	TraesCS4A01G394600	Anthocyanin 5-aromatic acyltransferase
4A	669829252	669831146	TraesCS4A01G394700	Anthocyanin 5-aromatic acyltransferase
4A	669835283	669836884	TraesCS4A01G394800	Anthocyanin 5-aromatic acyltransferase
4A	669897779	669899029	TraesCS4A01G394900	Peroxidase
4A	669898255	669898638	TraesCS4A01G395000	peroxidase
4A	669904107	669905857	TraesCS4A01G395100	Sec14p-like phosphatidylinositol transfer family protein
4A	669920359	669921225	TraesCS4A01G395200	F-box family protein
4A	669992559	669993617	TraesCS4A01G395300	F-box family protein
4A	670146027	670148458	TraesCS4A01G395400	AP2-like ethylene-responsive transcription factor
4A	670215416	670216339	TraesCS4A01G395500	E3 ubiquitin-protein ligase
4A	670326732	670328140	TraesCS4A01G395600	E3 ubiquitin-protein ligase
4A	670847831	670851967	TraesCS4A01G395700	Single-stranded DNA-binding protein WHY1, chloroplastic
4A	670942190	670943807	TraesCS4A01G395800	Embryogenesis transmembrane protein-like
4A	670947992	670948549	TraesCS4A01G395900	Oligosaccharyltransferase complex subunit ostc
4A	670979360	670980529	TraesCS4A01G396000	F-box family protein
4A	670984776	670985945	TraesCS4A01G396100	F-box family protein
4A	671523277	671527175	TraesCS4A01G396200	WRKY family transcription factor
4A	671596939	671602531	TraesCS4A01G396300	WRKY family transcription factor
4A	671639219	671643709	TraesCS4A01G396400	WRKY family transcription factor
4A	671644040	671647638	TraesCS4A01G396500	DUF1995 domain protein
4A	671649057	671651308	TraesCS4A01G396600	Iron-sulfur cluster insertion protein erpA
4A	671924283	671926048	TraesCS4A01G396700	Protein kinase
4A	671932237	671936050	TraesCS4A01G396800	RNA-binding family protein
4A	671940398	671942342	TraesCS4A01G396900	Histone-lysine N-methyltransferase-like protein
4A	671944972	671946632	TraesCS4A01G397000	GDSL esterase/lipase
4A	672318683	672320567	TraesCS4A01G397100	F-box family protein
4A	672409546	672410355	TraesCS4A01G397200	F-box family protein
4A	672517113	672518315	TraesCS4A01G397300	F-box family protein
4A	672633200	672634270	TraesCS4A01G397400	PHD finger alfin-like protein
4A	672793564	672794633	TraesCS4A01G397500	PHD finger alfin-like protein
4A	673029033	673030300	TraesCS4A01G397600	F-box family protein
4A	673041057	673042314	TraesCS4A01G397700	Kinase
4A	673067764	673071513	TraesCS4A01G397800	tRNA-specific adenosine deaminase
4A	673072299	673073823	TraesCS4A01G397900	GDSL esterase/lipase
4A	673144040	673146640	TraesCS4A01G398000	F-box family protein
4A	673167786	673170441	TraesCS4A01G398100	E3 ubiquitin-protein ligase SINA-like 2
4A	673216931	673218088	TraesCS4A01G398200	F-box family protein
4A	673411681	673413933	TraesCS4A01G398300	Polyamine aminopropyltransferase
4A	673443226	673451112	TraesCS4A01G398400	protein kinase family protein
4A	673488922	673490431	TraesCS4A01G398500	GDSL esterase/lipase
4A	673675386	673676892	TraesCS4A01G398600	GDSL esterase/lipase
4A	673716503	673718494	TraesCS4A01G398700	GDSL esterase/lipase
4A	673772983	673774494	TraesCS4A01G398800	Cytochrome P450 family protein
4A	673780529	673783201	TraesCS4A01G398900	Calcium uniporter protein, mitochondrial
4A	673802784	673804325	TraesCS4A01G399000	Cytochrome P450 family protein
4A	673856669	673858986	TraesCS4A01G399100	F-box family protein
4A	673956630	673960670	TraesCS4A01G399200	Acyl-CoA synthetase family protein
4A	673965529	673966948	TraesCS4A01G399300	GDSL esterase/lipase
4A	673975178	673977318	TraesCS4A01G399400	Keratin, type II cytoskeletal 73
4A	673978690	673979811	TraesCS4A01G399500	pre-mRNA-splicing factor CWC22-like protein (DUF3245)
4A	674335118	674341440	TraesCS4A01G399600	Receptor-like protein kinase
4A	674350933	674353126	TraesCS4A01G399700	Myosin heavy chain-related-like
4A	674354359	674355160	TraesCS4A01G399800	pre-mRNA-splicing factor CWC22-like protein (DUF3245)
4A	674435416	674438929	TraesCS4A01G399900	Calcium uniporter protein, mitochondrial
4A	674587829	674589412	TraesCS4A01G400000	NBS-LRR-like resistance protein
4A	674589763	674593056	TraesCS4A01G400100	Disease resistance protein RPM1
4A	674601958	674604670	TraesCS4A01G400200	3'(2'),5'-bisphosphate nucleotidase 1
4A	674718770	674727394	TraesCS4A01G400300	Disease resistance protein RPM1
4A	674773561	674781067	TraesCS4A01G400500	Xyloglucan alpha-1,6-xylosyltransferase
4A	674907181	674909883	TraesCS4A01G400600	Purple acid phosphatase
4A	674918874	674925874	TraesCS4A01G400700	Purple acid phosphatase
4A	674932076	674940073	TraesCS4A01G400800	Disease resistance protein RPM1
4A	674940722	674942704	TraesCS4A01G400900	Pentatricopeptide repeat-containing protein
4A	674944110	674944310	TraesCS4A01G401000	Transmembrane protein, putative
4A	675131531	675135181	TraesCS4A01G401100	Nucleosome assembly protein 1-1
4A	675279459	675280828	TraesCS4A01G401200	Non-canonical purine NTP pyrophosphatase
4A	675283412	675285824	TraesCS4A01G401300	Phenylalanine ammonia-lyase
4A	675515106	675520264	TraesCS4A01G401400	Acetyl-coenzyme A carboxylase carboxyl transferase subunit alpha
4A	675524945	675526381	TraesCS4A01G401500	HXXXD-type acyl-transferase-like protein
4A	675588052	675590292	TraesCS4A01G401600	Cysteine synthase
4A	675600634	675602969	TraesCS4A01G401700	Cysteine synthase
4A	675796070	675801940	TraesCS4A01G401800	Xyloglucan alpha-1,6-xylosyltransferase
4A	675854865	675855512	TraesCS4A01G402000	Histone H3
4A	675923694	675928242	TraesCS4A01G402100	Disease resistance protein (NBS-LRR class) family
4A	675928926	675933399	TraesCS4A01G402200	Xyloglucan endotransglucosylase/hydrolase
4A	675954282	675955571	TraesCS4A01G402300	Xyloglucan endotransglucosylase/hydrolase
4A	675966131	675966909	TraesCS4A01G402400	Pollen-specific protein
4A	675967409	675970011	TraesCS4A01G402500	BRISC and BRCA1-A complex member 1
4A	676158373	676159551	TraesCS4A01G402600	Transmembrane protein, putative
4A	676455378	676457237	TraesCS4A01G402700	AT4G29520-like protein
4A	676527806	676530992	TraesCS4A01G402800	AT4G29520-like protein
4A	676535402	676538202	TraesCS4A01G402900	Ubiquitin carboxyl-terminal hydrolase 2
4A	676542274	676550356	TraesCS4A01G403000	pre-mRNA-splicing factor CWC22-like protein (DUF3245)
4A	676551893	676553554	TraesCS4A01G403100	Leucine-rich repeat (LRR) family protein
4A	676781760	676782287	TraesCS4A01G403200	Blue copper protein
4A	676813030	676817353	TraesCS4A01G403300	Zinc transporter
4A	676878765	676880162	TraesCS4A01G403400	HXXXD-type acyl-transferase family protein
4A	676931358	676932347	TraesCS4A01G403500	HXXXD-type acyl-transferase family protein
4A	677112155	677113554	TraesCS4A01G403600	MADS-box transcription factor family protein
4A	677309370	677309490	TraesCS4A01G403700	wound-responsive family protein
4A	677730479	677731741	TraesCS4A01G403800	F-box plant-like protein, putative
4A	677809935	677816236	TraesCS4A01G403900	Receptor-like protein kinase
4A	677935067	677937287	TraesCS4A01G404000	GEM-like protein 1
4A	677957342	677958523	TraesCS4A01G404100	Purine permease-like protein
4A	677968336	677969511	TraesCS4A01G404200	Purine permease-like protein
4A	677987692	677988867	TraesCS4A01G404300	Purine permease-like protein
4A	678039191	678040363	TraesCS4A01G404400	Purine permease-like protein
4A	678127175	678131168	TraesCS4A01G404500	Protein DETOXIFICATION
4A	678132834	678133901	TraesCS4A01G404600	RING/U-box superfamily protein
4A	678217789	678219921	TraesCS4A01G404700	Basic helix-loop-helix transcription factor
4A	678340392	678341035	TraesCS4A01G404800	arabinogalactan protein 5
4A	678367725	678368305	TraesCS4A01G404900	Heavy metal transport/detoxification superfamily protein
4A	678369661	678370288	TraesCS4A01G405000	arabinogalactan protein 1
4A	678373388	678373759	TraesCS4A01G405100	Classical arabinogalactan protein 5
4A	678373398	678373766	TraesCS4A01G405200	Polyribonucleotide nucleotidyltransferase
4A	678375972	678376675	TraesCS4A01G405300	Classical arabinogalactan protein 5
4A	678404441	678405025	TraesCS4A01G405400	ankyrin repeat family protein / regulator of chromosome condensation (RCC1) family protein
4A	678408482	678408853	TraesCS4A01G405500	Classical arabinogalactan protein 5
4A	678418867	678419226	TraesCS4A01G405600	Classical arabinogalactan protein 5
4A	678816554	678817108	TraesCS4A01G405700	Invertase inhibitor
4A	678872316	678873272	TraesCS4A01G405800	Homeobox protein, putative
4A	679068644	679069153	TraesCS4A01G405900	UPF0503 protein, chloroplastic
4A	679074124	679075539	TraesCS4A01G406000	WEB family protein, chloroplastic
4A	679075998	679079860	TraesCS4A01G406100	Alcohol dehydrogenase, putative
4A	679084701	679086649	TraesCS4A01G406200	Alcohol dehydrogenase, putative
4A	679158638	679160958	TraesCS4A01G406300	1,4-dihydroxy-2-naphthoate polyprenyltransferase, chloroplastic
4A	679256888	679259902	TraesCS4A01G406400	Leucine-rich repeat family protein, putative, expressed
4A	679269957	679271524	TraesCS4A01G406500	rRNA-processing EBP2-like protein
4A	679274336	679277205	TraesCS4A01G406600	Ubiquitin carboxyl-terminal hydrolase, putative
4A	679656945	679658897	TraesCS4A01G406700	T-complex protein 1 subunit alpha
4A	679966655	679967888	TraesCS4A01G406800	4-hydroxy-2-oxovalerate aldolase
4A	679974372	679979140	TraesCS4A01G406900	transmembrane protein
4A	679980468	679981442	TraesCS4A01G407000	Cleavage and polyadenylation specificity factor subunit 6
4A	679981925	679989834	TraesCS4A01G407100	Calmodulin-binding transcription activator
4A	680021163	680026365	TraesCS4A01G407200	Mitochondrial carrier protein, expressed
4A	680046436	680047199	TraesCS4A01G407300	WW domain-containing protein
4A	680342891	680343238	TraesCS4A01G407400	Formate--tetrahydrofolate ligase
4A	680370183	680371906	TraesCS4A01G407500	Ras-related protein
4A	680373308	680376652	TraesCS4A01G407600	Mitochondrial carrier protein, expressed
4A	680391638	680392408	TraesCS4A01G407700	Late embryogenesis abundant hydroxyproline-rich glycoprotein, putative
4A	680397831	680402446	TraesCS4A01G407800	Pumilio
4A	680451169	680453556	TraesCS4A01G407900	Subtilisin-like protease
4A	680585695	680590244	TraesCS4A01G408000	Cysteine--tRNA ligase
4A	681112071	681113618	TraesCS4A01G408100	Xyloglucan galactosyltransferase KATAMARI1-like protein
4A	681118164	681119842	TraesCS4A01G408200	Xyloglucan galactosyltransferase KATAMARI1
4A	681176309	681177724	TraesCS4A01G408300	Xyloglucan galactosyltransferase KATAMARI1-like protein
4A	681178686	681178997	TraesCS4A01G408400	Flowering-promoting factor 1-like protein 1
4A	681182392	681182727	TraesCS4A01G408500	Flowering-promoting factor 1-like protein 1
4A	681360663	681365389	TraesCS4A01G408600	At1g04650-like protein
4A	681592914	681594333	TraesCS4A01G408700	basic helix-loop-helix (bHLH) DNA-binding superfamily protein
4A	681653116	681658841	TraesCS4A01G408800	basic helix-loop-helix (bHLH) DNA-binding superfamily protein
4A	681662107	681680744	TraesCS4A01G408900	Cytoplasmic FMR1-interacting
4A	681711088	681715805	TraesCS4A01G409000	PHD finger protein ING
4A	681716618	681721572	TraesCS4A01G409100	60 kDa chaperonin
4A	681790012	681791181	TraesCS4A01G409200	Terminal flower 1-like protein
4A	681896878	681898788	TraesCS4A01G409300	Xyloglucan galactosyltransferase KATAMARI1-like protein
4A	681917532	681920636	TraesCS4A01G409400	Receptor-like protein kinase
4A	681934028	681934744	TraesCS4A01G409500	Basic helix-loop-helix transcription factor
4A	682365105	682365927	TraesCS4A01G409600	GATA transcription factor
4A	682981334	682985118	TraesCS4A01G409700	Core-2/I-branching beta-1,6-N-acetylglucosaminyltransferase family protein, putative
4A	682990076	682992271	TraesCS4A01G409800	ARM repeat superfamily protein
4A	683256854	683259046	TraesCS4A01G409900	ARM repeat superfamily protein
4A	683428566	683437800	TraesCS4A01G410100	DENN domain containing protein, expressed
4A	683485130	683488380	TraesCS4A01G410200	Potassium transporter
4A	683492364	683494764	TraesCS4A01G410300	Mitochondrial import inner membrane translocase subunit TIM22
4A	683495208	683496536	TraesCS4A01G410400	WD40 repeat-like protein
4A	683499456	683502320	TraesCS4A01G410500	Ankyrin repeat-containing protein, putative
4A	683535295	683536546	TraesCS4A01G410600	Phytochrome kinase substrate 4
4A	683606191	683610931	TraesCS4A01G410700	Ras family protein
4A	683616676	683618332	TraesCS4A01G410800	Aquaporin
4A	683769319	683769794	TraesCS4A01G410900	Cyclin-dependent kinases regulatory subunit
4A	683778834	683782280	TraesCS4A01G411000	Pheophorbide a oxygenase, chloroplastic
4A	683787345	683787800	TraesCS4A01G411100	VQ motif family protein, expressed
4A	683800842	683801246	TraesCS4A01G411200	VQ motif family protein, expressed
4A	683805840	683806277	TraesCS4A01G411300	VQ motif family protein, expressed
4A	683862308	683869842	TraesCS4A01G411400	Pentatricopeptide repeat-containing protein
4A	683874073	683876623	TraesCS4A01G411500	NAD(P)H-quinone oxidoreductase subunit H, chloroplastic
4A	683877561	683899104	TraesCS4A01G411600	HEAT repeat family protein, expressed
4A	683912235	683915558	TraesCS4A01G411700	Receptor kinase-like protein
4A	683930531	683931079	TraesCS4A01G411800	BTB/POZ domain containing protein, expressed
4A	683967144	683968178	TraesCS4A01G411900	MYB transcription factor
4A	684060808	684061194	TraesCS4A01G412000	Zinc finger family protein
4A	684084323	684086196	TraesCS4A01G412100	Cytochrome P450, putative
4A	684175530	684176105	TraesCS4A01G412200	Ethylene-responsive transcription factor
4A	684216397	684216911	TraesCS4A01G412300	DNA topoisomerase
4A	684269457	684271353	TraesCS4A01G412500	Na(+)/H(+) antiporter NhaB
4A	684394658	684395909	TraesCS4A01G412600	UDP-Glycosyltransferase superfamily protein
4A	684448840	684449316	TraesCS4A01G412800	Cortical cell-delineating protein
4A	684471199	684471624	TraesCS4A01G412900	Cortical cell-delineating protein
4A	684503153	684503719	TraesCS4A01G413000	Ripening related protein family
4A	684514715	684518009	TraesCS4A01G413100	RNA-binding protein
4A	684532783	684536593	TraesCS4A01G413200	Cytokinin riboside 5'-monophosphate phosphoribohydrolase
4A	684584130	684589386	TraesCS4A01G413300	Methyltransferase-like protein 1
4A	684589915	684604421	TraesCS4A01G413400	Mitochondrial inner membrane protease subunit 1
4A	684606123	684607142	TraesCS4A01G413500	Tubulin-folding cofactor C
4A	684610626	684611340	TraesCS4A01G413600	Glycosyltransferase
4A	684611351	684611656	TraesCS4A01G413700	Glycosyltransferase
4A	684615348	684615458	TraesCS4A01G413800	vacuolar ATP synthase catalytic subunit-related / V-ATPase-related / vacuolar proton pump-like protein
4A	684616403	684619517	TraesCS4A01G413900	Phosphoribosylamine--glycine ligase
4A	684638466	684640740	TraesCS4A01G414000	Upf0496 protein
4A	684659489	684660559	TraesCS4A01G414100	kinase with tetratricopeptide repeat domain-containing protein
4A	684661377	684664025	TraesCS4A01G414200	Ubiquitin-conjugating enzyme E2
4A	684840795	684841283	TraesCS4A01G414300	SAUR-like auxin-responsive protein family
4A	684899281	684900343	TraesCS4A01G414400	Phosphate import ATP-binding protein PstB
4A	684904672	684905379	TraesCS4A01G414500	UPF0503 protein, chloroplastic
4A	684907832	684922923	TraesCS4A01G414600	Protein kinase
4A	684965195	684968394	TraesCS4A01G414700	Receptor-like kinase
4A	684974884	684979802	TraesCS4A01G414800	Zinc finger matrin-type protein 2
4A	684977075	684978187	TraesCS4A01G414900	2-oxoglutarate (2OG) and Fe(II)-dependent oxygenase superfamily protein
4A	684995623	685000822	TraesCS4A01G415000	Zinc finger protein
4A	685308518	685309385	TraesCS4A01G415100	Zinc finger family protein
4A	685339136	685340249	TraesCS4A01G415200	Sulfotransferase
4A	685371995	685372893	TraesCS4A01G415300	LOB domain-containing protein, putative
4A	685380729	685381598	TraesCS4A01G415400	LOB domain-containing protein, putative
4A	685421128	685423728	TraesCS4A01G415500	HR-like lesion-inducing protein-related protein
4A	685741166	685742825	TraesCS4A01G415600	WAT1-related protein
4A	685748621	685751905	TraesCS4A01G415700	Protein KINESIN LIGHT CHAIN-RELATED 3
4A	685769874	685770656	TraesCS4A01G415800	Ring finger protein, putative
4A	685786295	685787453	TraesCS4A01G415900	Ring finger protein, putative
4A	685826784	685827155	TraesCS4A01G416000	Ethylene-responsive transcription factor
4A	685834800	685836410	TraesCS4A01G416100	Phosphate transporter protein
4A	685935894	685936256	TraesCS4A01G416200	transcription regulator
4A	685939234	685941073	TraesCS4A01G416300	Phosphate transporter protein
4A	685997187	685998752	TraesCS4A01G416400	Phosphate transporter protein
4A	686138550	686140127	TraesCS4A01G416500	Phosphate transporter protein
4A	686168578	686170155	TraesCS4A01G416600	Phosphate transporter protein
4A	686173466	686179174	TraesCS4A01G416700	Appr-1-p processing enzyme family protein
4A	686375921	686384016	TraesCS4A01G416800	Zinc finger protein
4A	686385153	686385613	TraesCS4A01G416900	dipeptide transport ATP-binding protein
4A	686529432	686530472	TraesCS4A01G417000	Phosphate-responsive 1 family protein
4A	686590860	686599015	TraesCS4A01G417100	Disease resistance protein RPM1
4A	687312230	687314715	TraesCS4A01G417300	RNA 2'-phosphotransferase
4A	687315819	687317351	TraesCS4A01G417400	30S ribosomal protein S10
4A	687318556	687320997	TraesCS4A01G417500	Lipid phosphate phosphatase-like protein
4A	687626578	687628248	TraesCS4A01G417600	Cytochrome P450
4A	687660414	687661977	TraesCS4A01G417700	Cytochrome P450
4A	687808291	687810232	TraesCS4A01G417800	GDSL esterase/lipase
4A	687813492	687832845	TraesCS4A01G417900	Phosphate transporter
4A	687892533	687894351	TraesCS4A01G418000	Phosphate transporter
4A	688092065	688095665	TraesCS4A01G418100	Succinate dehydrogenase subunit 5, mitochondrial
4A	688097442	688100234	TraesCS4A01G418200	Starch synthase, chloroplastic/amyloplastic
4A	688325963	688327706	TraesCS4A01G418300	Phosphate transporter
4A	688373566	688375384	TraesCS4A01G418400	Phosphate transporter
4A	688451755	688452045	TraesCS4A01G418500	Avr9/Cf-9 rapidly elicited protein
4A	688500421	688501138	TraesCS4A01G418600	histone acetyltransferase of the CBP family 12
4A	688808470	688811511	TraesCS4A01G418700	Disease resistance protein RPM1
4A	688820664	688829813	TraesCS4A01G418800	Disease resistance protein RPM1
4A	688952250	688954992	TraesCS4A01G418900	GRIP and coiled-coil domain-containing protein 1
4A	688969367	688971163	TraesCS4A01G419000	histone acetyltransferase of the CBP family 5
4A	688970141	688974932	TraesCS4A01G419100	Disease resistance protein RPM1
4A	688984006	688985018	TraesCS4A01G419200	Disease resistance protein
4A	689136697	689137779	TraesCS4A01G419300	Peroxidase
4A	689847478	689849619	TraesCS4A01G419400	Arginine decarboxylase
4A	690409648	690413749	TraesCS4A01G419600	Cell cycle checkpoint protein RAD1
4A	690527413	690532426	TraesCS4A01G419700	Alpha/beta-hydrolase superfamily protein
4A	690619218	690623564	TraesCS4A01G419800	Cell cycle checkpoint protein RAD1
4A	690674348	690689421	TraesCS4A01G419900	NAC domain-containing protein
4A	690879367	690881558	TraesCS4A01G420000	NAC domain-containing protein
4A	690884353	690886971	TraesCS4A01G420100	NAC domain-containing protein
4A	690936084	690938246	TraesCS4A01G420200	NAC domain-containing protein
4A	690982809	690983491	TraesCS4A01G420300	Disease resistance protein RPM1
4A	690991936	690992618	TraesCS4A01G420400	Glycerol-3-phosphate acyltransferase
4A	690993991	690994539	TraesCS4A01G420500	DNA topoisomerase
4A	691123920	691125062	TraesCS4A01G420600	Methyltransferase, putative
4A	691125374	691125910	TraesCS4A01G420700	RING/U-box superfamily protein
4A	691132533	691133900	TraesCS4A01G420800	Lung seven transmembrane receptor family protein
4A	691150636	691153227	TraesCS4A01G420900	NAC domain-containing protein
4A	691166275	691169394	TraesCS4A01G421000	NAC domain-containing protein
4A	691246763	691249180	TraesCS4A01G421100	NAC domain-containing protein
4A	691323832	691325977	TraesCS4A01G421200	NAC domain-containing protein
4A	691467349	691470115	TraesCS4A01G421300	NAC domain-containing protein, putative
4A	692070619	692078867	TraesCS4A01G421400	Coatomer subunit beta'-1
4A	692079299	692079825	TraesCS4A01G421500	Histone H3
4A	692087454	692089576	TraesCS4A01G421600	LRR receptor-like serine/threonine-protein kinase GSO2
4A	692164614	692166736	TraesCS4A01G421700	LRR receptor-like serine/threonine-protein kinase GSO2
4A	692271611	692274622	TraesCS4A01G421800	Leucine-rich repeat receptor-like protein kinase family protein
4A	692358851	692359360	TraesCS4A01G421900	Histone H3
4A	692365038	692373132	TraesCS4A01G422000	Prokaryotic ubiquitin-like protein Pup
4A	692383021	692386045	TraesCS4A01G422100	26S proteasome non-atpase regulatory subunit, putative
4A	692392989	692394370	TraesCS4A01G422200	Serpin-like protein
4A	692474506	692476967	TraesCS4A01G422300	Cysteine protease, putative
4A	692546017	692551647	TraesCS4A01G422400	Katanin p60 ATPase-containing subunit, putative
4A	692655480	692655758	TraesCS4A01G422500	SPA1-related 3
4A	692680788	692681054	TraesCS4A01G422600	Pre-mRNA-splicing ATP-dependent RNA helicase PRP28
4A	692953459	692959802	TraesCS4A01G422700	Receptor protein kinase
4A	692963168	692969236	TraesCS4A01G422800	Cell cycle regulated microtubule associated protein
4A	693274790	693278073	TraesCS4A01G422900	1-aminocyclopropane-1-carboxylate synthase
4A	693279815	693280424	TraesCS4A01G423000	Peptidyl-prolyl cis-trans isomerase
4A	693355086	693356494	TraesCS4A01G423100	DNA topoisomerase
4A	693432178	693432780	TraesCS4A01G423200	F-box domain containing protein
4A	693450996	693452150	TraesCS4A01G423300	F-box domain containing protein
4A	693490396	693491553	TraesCS4A01G423400	F-box family protein
4A	693493627	693496838	TraesCS4A01G423500	GAGA-binding transcriptional activator
4A	693524739	693525442	TraesCS4A01G423600	Histone H1
4A	693596418	693596927	TraesCS4A01G423800	Histone H3
4A	693783434	693785647	TraesCS4A01G423900	Subtilisin-like protease SDD1
4A	694676903	694677172	TraesCS4A01G424000	Lipid transfer protein
4A	694695585	694695854	TraesCS4A01G424100	Lipid transfer protein
4A	694709661	694709930	TraesCS4A01G424200	Lipid transfer protein
4A	694847779	694848564	TraesCS4A01G424300	F-box protein
4A	694861480	694862328	TraesCS4A01G424400	RNA-dependent RNA polymerase
4A	695804956	695807204	TraesCS4A01G424500	ATP-dependent zinc metalloprotease FTSH protein
4A	695974602	695977821	TraesCS4A01G424700	Pentatricopeptide repeat-containing protein
4A	695997718	695998958	TraesCS4A01G424800	Sulfite exporter TauE/SafE family protein, putative
4A	696000979	696004826	TraesCS4A01G424900	Cytochrome P450
4A	696005186	696006398	TraesCS4A01G425000	coiled-coil protein
4A	696006585	696009064	TraesCS4A01G425100	Nudix hydrolase
4A	696078819	696079217	TraesCS4A01G425200	NAC domain containing protein 50
4A	697382833	697390065	TraesCS4A01G425300	SPX domain-containing family protein
4A	697432864	697433629	TraesCS4A01G425400	Citrate-binding protein
4A	697439303	697440068	TraesCS4A01G425500	Citrate-binding protein
4A	697502997	697503728	TraesCS4A01G425600	BTB/POZ domain containing protein, expressed
4A	697574053	697574463	TraesCS4A01G425700	BTB/POZ domain containing protein
4A	697732774	697733823	TraesCS4A01G425800	Serine/threonine-protein phosphatase 7 long form-like protein
4A	697747898	697748799	TraesCS4A01G425900	Serine/threonine protein phosphatase 7 long form isogeny
4A	697768120	697770642	TraesCS4A01G426000	Chaperone protein dnaJ, putative
4A	697940031	697944617	TraesCS4A01G426100	Ribosomal RNA small subunit methyltransferase G
4A	697947253	697949084	TraesCS4A01G426200	B3 domain-containing protein
4A	697951818	697953734	TraesCS4A01G426300	GDSL esterase/lipase
4A	697970402	697971466	TraesCS4A01G426400	HXXXD-type acyl-transferase family protein
4A	698016267	698017121	TraesCS4A01G426500	Serine/threonine-protein phosphatase 7 long form-like protein
4A	698022257	698022520	TraesCS4A01G426600	Lactoferrin-binding protein A
4A	698039681	698041603	TraesCS4A01G426700	GDSL esterase/lipase
4A	698050502	698052688	TraesCS4A01G426800	Pentatricopeptide repeat-containing protein family
4A	698053519	698055797	TraesCS4A01G426900	5'-methylthioadenosine/S-adenosylhomocysteine nucleosidase
4A	698104314	698107018	TraesCS4A01G427000	Mitochondrial carrier protein-like
4A	698130647	698134830	TraesCS4A01G427100	Ankyrin repeat-containing protein
4A	698169016	698172207	TraesCS4A01G427200	Receptor-like protein kinase
4A	698175294	698175702	TraesCS4A01G427300	Dynein light chain family protein
4A	698310854	698312296	TraesCS4A01G427400	Serpin-like protein
4A	698426815	698432810	TraesCS4A01G427500	T-complex protein 1 subunit alpha
4A	698491676	698493312	TraesCS4A01G427600	Serpin
4A	698564302	698564598	TraesCS4A01G427800	NADH dehydrogenase subunit 2
4A	698861070	698862620	TraesCS4A01G427900	Protein kinase family protein
4A	698886265	698889429	TraesCS4A01G428000	Mitochondrial carrier protein-like
4A	698919309	698919902	TraesCS4A01G428100	Receptor protein kinase, putative
4A	698933462	698935444	TraesCS4A01G428200	Receptor-like protein kinase
4A	699004383	699004787	TraesCS4A01G428300	Dynein light chain family protein
4A	699188161	699192710	TraesCS4A01G428400	F-box family protein
4A	699790453	699793645	TraesCS4A01G428500	Pentatricopeptide repeat-containing protein
4A	699793967	699796519	TraesCS4A01G428600	Impaired sucrose induction protein, putative
4A	699884052	699885371	TraesCS4A01G428700	BTB/POZ domain-containing protein
4A	699887515	699889113	TraesCS4A01G428800	Short-chain dehydrogenase/reductase family protein
4A	699900013	699902219	TraesCS4A01G428900	V-type proton ATPase subunit e
4A	699934529	699935173	TraesCS4A01G429000	BON1-associated protein 2
4A	699975857	699981735	TraesCS4A01G429100	Ankyrin repeat family protein
4A	700013247	700016381	TraesCS4A01G429200	Ribosomal protein L29 family protein
4A	700017923	700024974	TraesCS4A01G429300	Nucleolar protein 10
4A	700417779	700422201	TraesCS4A01G429400	LMBR1-like membrane protein
4A	700428310	700429887	TraesCS4A01G429500	GDSL esterase/lipase
4A	700449628	700450459	TraesCS4A01G429600	B3 domain-containing protein
4A	700733597	700739624	TraesCS4A01G429700	Laccase
4A	701282919	701283623	TraesCS4A01G429800	Glutathione S-transferase
4A	701293297	701294011	TraesCS4A01G429900	Glutathione S-transferase
4A	701311592	701312189	TraesCS4A01G430000	DUF581 family protein
4A	701479995	701482396	TraesCS4A01G430100	Dirigent protein
4A	701561985	701564359	TraesCS4A01G430200	Dirigent protein
4A	701696892	701701796	TraesCS4A01G430300	UDP-glucuronate:xylan alpha-glucuronosyltransferase 1
4A	701757478	701760471	TraesCS4A01G430400	Receptor-like protein kinase
4A	701762395	701765658	TraesCS4A01G430500	RNase P Rpr2/Rpp21 subunit domain protein
4A	701884824	701886689	TraesCS4A01G430600	Scarecrow transcription factor family protein
4A	701941232	701943080	TraesCS4A01G430700	F-box family protein
4A	701962800	701964190	TraesCS4A01G430800	rRNA N-glycosidase
4A	701985008	701987769	TraesCS4A01G430900	Phosphate transporter
4A	702009133	702010210	TraesCS4A01G431000	protein kinase family protein
4A	702028092	702030065	TraesCS4A01G431100	F-box domain containing protein
4A	702038328	702039507	TraesCS4A01G431200	Acid phosphatase 1
4A	702044351	702046457	TraesCS4A01G431300	Acid phosphatase 1
4A	702070251	702073165	TraesCS4A01G431400	Dirigent protein
4A	702297272	702298804	TraesCS4A01G431500	Tryptophan decarboxylase
4A	702326272	702327804	TraesCS4A01G431600	Tryptophan decarboxylase
4A	702331167	702331763	TraesCS4A01G431700	Late embryogenesis abundant (LEA) hydroxyproline-rich glycoprotein family
4A	702338811	702340600	TraesCS4A01G431800	senescence-associated family protein, putative (DUF581)
4A	702379784	702381647	TraesCS4A01G431900	senescence-associated family protein, putative (DUF581)
4A	702505246	702506002	TraesCS4A01G432000	DUF581 family protein
4A	702864112	702864663	TraesCS4A01G432100	GRF zinc finger / Zinc knuckle protein
4A	703261517	703268053	TraesCS4A01G432200	SET domain-containing protein
4A	703268559	703270798	TraesCS4A01G432300	Kinase family protein
4A	703336757	703340732	TraesCS4A01G432400	RNA-binding family protein
4A	703409407	703410762	TraesCS4A01G432500	BTB/POZ domain containing protein, expressed
4A	703431612	703432769	TraesCS4A01G432600	BTB/POZ domain containing protein
4A	703441590	703442573	TraesCS4A01G432700	BTB/POZ domain containing protein
4A	703535145	703550476	TraesCS4A01G432800	Anthocyanin 5-aromatic acyltransferase
4A	703605161	703607160	TraesCS4A01G432900	Glycosyltransferase
4A	703650734	703653295	TraesCS4A01G433000	Glycosyltransferase
4A	703707254	703708864	TraesCS4A01G433100	Glycosyltransferase
4A	703931977	703933260	TraesCS4A01G433200	ABA-responsive binding factor
4A	704153047	704154010	TraesCS4A01G433300	Drought responsive element binding transcription factor 3
4A	704196707	704197159	TraesCS4A01G433400	UBX domain-containing protein
4A	704223453	704224006	TraesCS4A01G433500	UBX domain-containing protein
4A	704250127	704250668	TraesCS4A01G433600	UBX domain-containing protein
4A	704478248	704479974	TraesCS4A01G433700	Protein kinase, putative
4A	704526573	704530717	TraesCS4A01G433800	Protein kinase
4A	704644846	704648094	TraesCS4A01G433900	Glutathione s-transferase
4A	704795701	704797806	TraesCS4A01G434000	Superoxide dismutase
4A	704802395	704805704	TraesCS4A01G434100	CYCLOPS
4A	704806924	704807953	TraesCS4A01G434200	Histone-lysine N-methyltransferase, H3 lysine-36 specific
4A	705054351	705055103	TraesCS4A01G434300	ATPase E1-E2 type family protein / haloacid dehalogenase-like hydrolase family protein
4A	705056020	705056494	TraesCS4A01G434400	myb domain protein 65
4A	705169668	705170420	TraesCS4A01G434500	Microprocessor complex subunit DGCR8
4A	705178291	705180456	TraesCS4A01G434600	zinc finger B-box protein
4A	705429986	705434950	TraesCS4A01G434700	Ankyrin repeat family protein, putative, expressed
4A	705504781	705508363	TraesCS4A01G434800	Kinase-like protein
4A	705510262	705513006	TraesCS4A01G434900	Growth-regulating factor
4A	705517725	705521196	TraesCS4A01G435000	Syntaxin
4A	705528273	705528820	TraesCS4A01G435100	DNA topoisomerase
4A	705537314	705539254	TraesCS4A01G435200	SNAP25 homologous protein SNAP33
4A	705544563	705546398	TraesCS4A01G435300	Glutathione S-transferase
4A	705571618	705572478	TraesCS4A01G435400	DNA topoisomerase
4A	705627294	705628321	TraesCS4A01G435500	Harpin inducing protein
4A	705632681	705633981	TraesCS4A01G435600	Urease accessory protein UreH
4A	705639200	705640587	TraesCS4A01G435700	F-box and associated interaction domains-containing protein
4A	705694240	705695436	TraesCS4A01G435800	F-box family protein
4A	705763229	705764554	TraesCS4A01G436000	Serpin-like protein
4A	705889443	705890720	TraesCS4A01G436100	Alpha/beta-Hydrolases superfamily protein, putative
4A	705952621	705953808	TraesCS4A01G436200	Chalcone synthase
4A	705958557	705959917	TraesCS4A01G436300	Alpha/beta-Hydrolases superfamily protein, putative
4A	706088597	706089784	TraesCS4A01G436400	Chalcone synthase
4A	706094938	706096128	TraesCS4A01G436500	Alpha/beta-Hydrolases superfamily protein, putative
4A	706497080	706499477	TraesCS4A01G436600	ATP-dependent Clp protease ATP-binding subunit
4A	706537515	706538039	TraesCS4A01G436700	Calcium-binding protein
4A	706593676	706597437	TraesCS4A01G436800	Disease resistance protein (NBS-LRR class) family
4A	706706670	706709376	TraesCS4A01G436900	ATP-dependent Clp protease ATP-binding subunit
4A	706834705	706838859	TraesCS4A01G437000	ATP-dependent Clp protease ATP-binding subunit
4A	707036686	707039415	TraesCS4A01G437100	DAG protein, chloroplastic
4A	707040590	707048030	TraesCS4A01G437200	Protein ENHANCED DISEASE RESISTANCE 2-like
4A	707247963	707248523	TraesCS4A01G437300	NDR1/HIN1-like 1
4A	707251125	707252373	TraesCS4A01G437400	F-box/LRR-repeat protein At5g63520
4A	707261853	707263684	TraesCS4A01G437500	Short-chain dehydrogenase/reductase family protein
4A	707304305	707305501	TraesCS4A01G437600	Chalcone synthase
4A	707402915	707403670	TraesCS4A01G437700	Alpha/beta-Hydrolases superfamily protein, putative
4A	707477003	707478259	TraesCS4A01G437800	Alpha/beta-Hydrolases superfamily protein, putative
4A	707487289	707488769	TraesCS4A01G437900	Chalcone synthase
4A	707645851	707646468	TraesCS4A01G438000	Alpha/beta-Hydrolases superfamily protein, putative
4A	707674809	707675996	TraesCS4A01G438100	Chalcone synthase
4A	707702268	707703455	TraesCS4A01G438200	Chalcone synthase
4A	708298967	708300464	TraesCS4A01G438300	2-oxoglutarate (2OG) and Fe(II)-dependent oxygenase superfamily protein
4A	708316828	708317415	TraesCS4A01G438400	Aspartyl/glutamyl-tRNA(Asn/Gln) amidotransferase subunit B 2
4A	708321357	708322381	TraesCS4A01G438500	Glutamate formiminotransferase 1
4A	708465260	708466208	TraesCS4A01G438600	Segregation and condensation protein B
4A	708566619	708570122	TraesCS4A01G438700	Receptor-kinase, putative
4A	708581130	708581728	TraesCS4A01G438800	Serine/threonine transporter SstT
4A	708595385	708596078	TraesCS4A01G438900	UDP-2,3-diacetamido-2,3-dideoxy-D-glucuronate 2-epimerase
4A	708610194	708614330	TraesCS4A01G439000	Oligopeptide transporter
4A	708632110	708632787	TraesCS4A01G439100	Laccase
4A	708648959	708652466	TraesCS4A01G439200	transmembrane protein, putative (DUF594)
4A	708659072	708659710	TraesCS4A01G439300	Potassium-transporting ATPase potassium-binding subunit
4A	708680003	708681402	TraesCS4A01G439400	Eukaryotic aspartyl protease family protein
4A	708688874	708690917	TraesCS4A01G439500	Disease resistance protein (CC-NBS-LRR class) family
4A	708733544	708734179	TraesCS4A01G439600	Late embryogenesis abundant protein
4A	708752860	708755271	TraesCS4A01G439700	transmembrane protein, putative (DUF594)
4A	708913760	708916782	TraesCS4A01G439800	2-oxoglutarate (2OG) and Fe(II)-dependent oxygenase superfamily protein
4A	709023314	709025574	TraesCS4A01G439900	Factor of DNA methylation 1
4A	709038047	709044871	TraesCS4A01G440000	protein phosphatase 2A subunit A3
4A	709114780	709117191	TraesCS4A01G440100	Vitamin D3 receptor
4A	709203520	709203804	TraesCS4A01G440200	Seed maturation protein
4A	709205800	709209979	TraesCS4A01G440300	NRT1/PTR family protein 2.2
4A	709272155	709275823	TraesCS4A01G440400	Protein nrt1 ptr family 1.2
4A	709418326	709422229	TraesCS4A01G440500	Protein nrt1 ptr family 1.2
4A	709612443	709616324	TraesCS4A01G440600	Protein nrt1 ptr family 1.2
4A	709716334	709720574	TraesCS4A01G440700	Protein nrt1 ptr family 1.2
4A	709844907	709845638	TraesCS4A01G440900	Transcription factor E3
4A	709851498	709851995	TraesCS4A01G441000	magnesium-protoporphyrin IX methyltransferase
4A	709857418	709859054	TraesCS4A01G441100	PRLI-interacting factor
4A	709863178	709863964	TraesCS4A01G441200	Translation initiation factor IF-2
4A	709894624	709896089	TraesCS4A01G441400	RING/U-box superfamily protein
4A	709900905	709909255	TraesCS4A01G441500	Transcriptional corepressor SEUSS
4A	709976941	709979475	TraesCS4A01G441600	Receptor-like kinase, putative
4A	709997314	709998835	TraesCS4A01G441700	Aspartic proteinase nepenthesin-1
4A	710005449	710006392	TraesCS4A01G441800	DUF674 family protein
4A	710174245	710174946	TraesCS4A01G441900	DUF674 family protein
4A	710210597	710211393	TraesCS4A01G442000	Basic-leucine zipper (bZIP) transcription factor family protein
4A	710243465	710244619	TraesCS4A01G442100	BAG family molecular chaperone regulator-like protein
4A	710271287	710272168	TraesCS4A01G442200	Glycosyltransferase
4A	710283202	710284838	TraesCS4A01G442300	Glycosyltransferase
4A	710393742	710394650	TraesCS4A01G442400	Caffeoyl-CoA O-methyltransferase
4A	710412282	710413928	TraesCS4A01G442500	2-oxoglutarate (2OG) and Fe(II)-dependent oxygenase superfamily protein
4A	710663256	710668340	TraesCS4A01G442600	1-deoxy-D-xylulose 5-phosphate reductoisomerase
4A	710675735	710677391	TraesCS4A01G442700	Glycosyltransferase
4A	710693933	710695540	TraesCS4A01G442800	Glycosyltransferase
4A	710742945	710744427	TraesCS4A01G442900	Peroxisomal membrane protein 11 homolog
4A	710772475	710773648	TraesCS4A01G443000	Peroxidase
4A	710796174	710796819	TraesCS4A01G443100	Sodium-dependent phosphate transporter 1
4A	711778749	711781475	TraesCS4A01G443200	ATP-dependent Clp protease ATP-binding subunit
4A	711839832	711842701	TraesCS4A01G443300	ATP-dependent Clp protease ATP-binding subunit
4A	711956957	711962218	TraesCS4A01G443400	Protein phosphatase 2C
4A	711973715	711978971	TraesCS4A01G443500	Protein phosphatase 2C
4A	712111636	712113069	TraesCS4A01G443600	Cytochrome P450
4A	712445607	712447320	TraesCS4A01G443700	Cytochrome P450
4A	712596664	712597642	TraesCS4A01G443800	Asparagine--tRNA ligase
4A	712734332	712734997	TraesCS4A01G443900	4-hydroxy-tetrahydrodipicolinate synthase
4A	712764990	712765655	TraesCS4A01G444000	Arginine--tRNA ligase
4A	712848225	712849516	TraesCS4A01G444100	Protein kinase family protein
4A	712856736	712858739	TraesCS4A01G444200	WD40-repeat-containing domain-containing protein
4A	712863210	712873993	TraesCS4A01G444300	Phosphoglucan, water dikinase
4A	712878478	712878741	TraesCS4A01G444400	auxin transport protein (BIG)
4A	712915290	712917030	TraesCS4A01G444500	Haloacid dehalogenase-like hydrolase domain-containing protein 3
4A	712954682	712955562	TraesCS4A01G444600	Haloacid dehalogenase-like hydrolase domain-containing protein 3
4A	713014959	713016104	TraesCS4A01G444700	Disease resistance protein (NBS-LRR class) family
4A	713016436	713017572	TraesCS4A01G444800	NBS-LRR disease resistance protein, putative, expressed
4A	713032337	713035659	TraesCS4A01G444900	NBS-LRR disease resistance protein, putative, expressed
4A	713115583	713117802	TraesCS4A01G445000	GDSL esterase/lipase
4A	713119972	713120925	TraesCS4A01G445100	Seed specific protein Bn15D1B
4A	713186975	713188575	TraesCS4A01G445200	epstein-barr nuclear antigen
4A	713352055	713352438	TraesCS4A01G445300	Ozone-responsive stress-related protein
4A	713502841	713506406	TraesCS4A01G445500	Receptor protein kinase, putative
4A	713516952	713523294	TraesCS4A01G445600	Cytochrome P450
4A	713604407	713606067	TraesCS4A01G445700	Glycosyltransferase
4A	713630153	713630936	TraesCS4A01G445800	Seed maturation protein
4A	713728709	713730201	TraesCS4A01G445900	Carboxyl methyltransferase
4A	713829916	713830766	TraesCS4A01G446100	Seed specific protein Bn15D1B
4A	713833663	713834773	TraesCS4A01G446200	F-box protein
4A	713893696	713894322	TraesCS4A01G446300	Flavonoid 3' hydroxylase
4A	713931231	713935021	TraesCS4A01G446400	Flavonoid 3'-hydroxylase
4A	713948711	713949865	TraesCS4A01G446500	Calcium-dependent lipid-binding domain-containing protein
4A	714099723	714103581	TraesCS4A01G446600	Receptor-like protein kinase
4A	714176254	714180521	TraesCS4A01G446700	Sucrose synthase
4A	714191408	714194975	TraesCS4A01G446800	ARM repeat superfamily protein
4A	714270682	714277812	TraesCS4A01G446900	Cytochrome P450
4A	714293665	714295161	TraesCS4A01G447000	Glycosyltransferase
4A	714330206	714341492	TraesCS4A01G447100	Disease resistance protein RPM1
4A	714383600	714389254	TraesCS4A01G447200	NBS-LRR disease resistance protein
4A	714418331	714420301	TraesCS4A01G447300	NBS-LRR disease resistance protein
4A	714420314	714421764	TraesCS4A01G447400	NBS-LRR disease resistance protein
4A	714430281	714433824	TraesCS4A01G447500	NBS-LRR disease resistance protein
4A	714437016	714442552	TraesCS4A01G447600	NBS-LRR disease resistance protein
4A	714520203	714523323	TraesCS4A01G447700	NBS-LRR disease resistance protein
4A	714526478	714527688	TraesCS4A01G447800	Cytosolic Fe-S cluster assembly factor NBP35
4A	714564518	714568286	TraesCS4A01G447900	NBS-LRR disease resistance protein
4A	714844470	714847897	TraesCS4A01G448000	NBS-LRR disease resistance protein
4A	714896540	714902419	TraesCS4A01G448100	Receptor-like protein kinase
4A	714917348	714920519	TraesCS4A01G448200	Embryogenesis transmembrane protein-like
4A	714943640	714945165	TraesCS4A01G448300	NBS-LRR disease resistance protein
4A	714946807	714949180	TraesCS4A01G448400	NBS-LRR disease resistance protein
4A	714992146	714994829	TraesCS4A01G448500	NBS-LRR disease resistance protein
4A	715006429	715009801	TraesCS4A01G448600	NBS-LRR disease resistance protein
4A	715089834	715093464	TraesCS4A01G448700	NBS-LRR disease resistance protein
4A	715098019	715099107	TraesCS4A01G448800	NBS-LRR disease resistance protein
4A	715297285	715299420	TraesCS4A01G448900	Disease resistance protein RPM1
4A	715323378	715324796	TraesCS4A01G449000	HXXXD-type acyl-transferase family protein
4A	715353689	715355641	TraesCS4A01G449100	NBS-LRR disease resistance protein
4A	715437670	715440295	TraesCS4A01G449200	NBS-LRR disease resistance protein
4A	715507189	715510582	TraesCS4A01G449300	NBS-LRR disease resistance protein
4A	715558821	715559432	TraesCS4A01G449400	Invertase/pectin methylesterase inhibitor family protein
4A	715597690	715598310	TraesCS4A01G449500	Invertase inhibitor
4A	715638611	715641689	TraesCS4A01G449600	Patatin
4A	715713866	715719940	TraesCS4A01G449700	SHR5-receptor-like kinase
4A	715743679	715747059	TraesCS4A01G449800	Embryogenesis transmembrane protein-like
4A	715750645	715754353	TraesCS4A01G449900	Embryogenesis transmembrane protein-like
4A	715790168	715804274	TraesCS4A01G450000	Embryogenesis transmembrane protein-like
4A	715804997	715811113	TraesCS4A01G450100	Embryogenesis transmembrane protein-like
4A	715816135	715819591	TraesCS4A01G450200	Embryogenesis transmembrane protein-like
4A	715876076	715881133	TraesCS4A01G450300	Leucine-rich repeat receptor-like protein kinase
4A	715912612	715915780	TraesCS4A01G450400	Patatin
4A	715944901	715945512	TraesCS4A01G450500	Invertase/pectin methylesterase inhibitor family protein
4A	715988346	715991227	TraesCS4A01G450600	Disease resistance protein (NBS-LRR class) family
4A	716012997	716013623	TraesCS4A01G450800	Plant invertase/pectin methylesterase inhibitor
4A	716267906	716269984	TraesCS4A01G450900	Eukaryotic aspartyl protease family protein, expressed
4A	716703255	716703884	TraesCS4A01G451000	Invertase inhibitor
4A	716935201	716936799	TraesCS4A01G451100	Serine/threonine-protein kinase
4A	716944674	716944877	TraesCS4A01G451200	Powder tolerance-related protein
4A	716954327	716955517	TraesCS4A01G451300	F-box protein
4A	716962839	716964922	TraesCS4A01G451400	Cytochrome P450 family protein, expressed
4A	716973492	716974673	TraesCS4A01G451500	F-box protein
4A	716996169	716999174	TraesCS4A01G451600	Ubiquitin carboxyl-terminal hydrolase 2
4A	717018620	717021295	TraesCS4A01G451700	Ubiquitin carboxyl-terminal hydrolase 2
4A	717044525	717045703	TraesCS4A01G451800	F-box protein
4A	717223309	717236562	TraesCS4A01G451900	F-box protein
4A	717255386	717257694	TraesCS4A01G452000	F-box protein family-like
4A	717283059	717283919	TraesCS4A01G452100	F-box family protein
4A	717284524	717288165	TraesCS4A01G452200	F-box protein
4A	717296015	717297934	TraesCS4A01G452300	F-box protein
4A	717307494	717311250	TraesCS4A01G452400	Autophagy-related protein 22
4A	717649524	717651048	TraesCS4A01G452500	p-loop containing nucleoside triphosphate hydrolases superfamily protein, putative
4A	717723895	717724822	TraesCS4A01G452600	MYB-related transcription factor
4A	717738477	717742320	TraesCS4A01G452700	60 kDa chaperonin
4A	717749791	717755523	TraesCS4A01G452800	Protein TsgA
4A	717756039	717756950	TraesCS4A01G452900	F-box protein
4A	717758758	717760662	TraesCS4A01G453000	F-box protein family-like
4A	717800670	717805911	TraesCS4A01G453100	F-box protein
4A	717806891	717808834	TraesCS4A01G453200	F-box protein family-like
4A	717921332	717923336	TraesCS4A01G453300	F-box protein
4A	717960030	717964616	TraesCS4A01G453400	Gamma-gliadin
4A	717965598	717967877	TraesCS4A01G453500	F-box protein
4A	717971857	717972699	TraesCS4A01G453600	Gliadin-like avenin
4A	718033180	718034037	TraesCS4A01G453800	Gliadin-like avenin
4A	718046455	718049850	TraesCS4A01G453900	Tyrosine--tRNA ligase
4A	718077470	718078606	TraesCS4A01G454000	F-box protein
4A	718183610	718184746	TraesCS4A01G454100	F-box protein
4A	718423178	718424275	TraesCS4A01G454200	F-box protein
4A	718465162	718468038	TraesCS4A01G454300	Leucine-rich repeat receptor-like protein kinase family protein
4A	718470942	718474357	TraesCS4A01G454400	NBS-LRR disease resistance protein
4A	718618556	718619505	TraesCS4A01G454500	Glutathione S-transferase
4A	718751592	718753130	TraesCS4A01G454600	F-box protein
4A	718835241	718836195	TraesCS4A01G454700	Glutathione S-transferase
4A	718848841	718850219	TraesCS4A01G454800	Glutathione S-transferase
4A	718855183	718857790	TraesCS4A01G454900	Disease resistance protein (TIR-NBS-LRR class) family
4A	718866179	718867005	TraesCS4A01G455000	Glutathione S-transferase
4A	718895149	718895601	TraesCS4A01G455100	Leucine-rich repeat receptor-like protein kinase family protein
4A	718895635	718898025	TraesCS4A01G455200	Leucine-rich repeat receptor-like protein kinase family protein
4A	718936389	718937231	TraesCS4A01G455300	F-box protein
4A	718968044	718969072	TraesCS4A01G455400	F-box protein
4A	718980549	718981319	TraesCS4A01G455500	F-box protein
4A	719011663	719017526	TraesCS4A01G455600	F-box protein
4A	719052538	719053686	TraesCS4A01G455700	F-box protein
4A	719164439	719168794	TraesCS4A01G455800	Guanine nucleotide-binding protein subunit alpha-like protein
4A	719178222	719179736	TraesCS4A01G455900	6-phosphogluconate dehydrogenase, decarboxylating
4A	720513302	720514657	TraesCS4A01G456000	DnaJ domain-containing protein
4A	720515883	720517087	TraesCS4A01G456100	Dolichyl-diphosphooligosaccharide--protein glycosyltransferase subunit DAD1
4A	720956516	720956854	TraesCS4A01G456200	Pentatricopeptide repeat (PPR) superfamily protein
4A	721381316	721385942	TraesCS4A01G456300	Cellulose synthase-like protein
4A	721412929	721416705	TraesCS4A01G456400	Diacylglycerol O-acyltransferase 2
4A	721640035	721640481	TraesCS4A01G456500	Arginine--tRNA ligase
4A	721826187	721827548	TraesCS4A01G456600	3-ketoacyl-CoA synthase
4A	721927272	721927770	TraesCS4A01G456800	GRF zinc finger family protein
4A	722287491	722294625	TraesCS4A01G456900	Protein kinase
4A	722297108	722299882	TraesCS4A01G457000	Protein kinase
4A	722410147	722413452	TraesCS4A01G457100	5'-methylthioadenosine/S-adenosylhomocysteine nucleosidase
4A	722414858	722415789	TraesCS4A01G457200	B3 domain-containing protein
4A	722779471	722779881	TraesCS4A01G457300	30S ribosomal protein S8
4A	722837944	722839558	TraesCS4A01G457400	30S ribosomal protein S13
4A	722841890	722845155	TraesCS4A01G457500	Glutaminyl-peptide cyclotransferase
4A	722882688	722887103	TraesCS4A01G457600	Membrane protein of ER body-like protein
4A	722899809	722905157	TraesCS4A01G457700	Membrane protein of ER body-like protein
4A	722905613	722906814	TraesCS4A01G457800	30S ribosomal protein S13
4A	722907617	722916166	TraesCS4A01G457900	Disease resistance protein (NBS-LRR class) family
4A	723018336	723023115	TraesCS4A01G458000	Membrane protein of er body-like protein
4A	723141161	723142633	TraesCS4A01G458100	S-adenosyl-L-methionine-dependent methyltransferases superfamily protein
4A	723513646	723518463	TraesCS4A01G458200	NBS-LRR-like resistance protein
4A	723588752	723609420	TraesCS4A01G458300	protein kinase family protein
4A	723637248	723639957	TraesCS4A01G458400	S-adenosyl-L-methionine-dependent methyltransferases superfamily protein
4A	723709354	723710051	TraesCS4A01G458500	B3 domain-containing protein
4A	723806870	723810164	TraesCS4A01G458600	RNA-binding protein 8A
4A	724017479	724017955	TraesCS4A01G458700	2-C-methyl-D-erythritol 4-phosphate cytidylyltransferase
4A	724399991	724400260	TraesCS4A01G458800	MYB transcription factor
4A	724482926	724484895	TraesCS4A01G458900	Protein kinase family protein
4A	724523761	724524309	TraesCS4A01G459000	DNA topoisomerase
4A	724578843	724580121	TraesCS4A01G459100	MYB transcription factor
4A	724782636	724783993	TraesCS4A01G459200	MYB transcription factor
4A	724790571	724812915	TraesCS4A01G459300	Callose synthase-like protein
4A	724853687	724855580	TraesCS4A01G459400	CsAtPR5
4A	725162676	725165408	TraesCS4A01G459500	CC-NBS-LRR disease resistance protein
4A	725265615	725265926	TraesCS4A01G459600	Protein phosphatase 2C
4A	725571628	725581816	TraesCS4A01G459700	Seed maturation protein
4A	725588193	725588525	TraesCS4A01G459800	Plant invertase/pectin methylesterase inhibitor superfamily
4A	725658514	725659170	TraesCS4A01G459900	Invertase inhibitor
4A	725660348	725664584	TraesCS4A01G460000	Eyes absent-like protein
4A	725669383	725673513	TraesCS4A01G460100	Cytochrome P450
4A	725751513	725752154	TraesCS4A01G460200	Invertase inhibitor
4A	725755023	725755646	TraesCS4A01G460300	Invertase inhibitor
4A	725802050	725802844	TraesCS4A01G460400	Invertase inhibitor
4A	725837242	725837892	TraesCS4A01G460500	Invertase inhibitor
4A	725838700	725839542	TraesCS4A01G460600	Invertase inhibitor
4A	725856994	725857716	TraesCS4A01G460700	Invertase inhibitor
4A	725860155	725860760	TraesCS4A01G460800	Invertase inhibitor
4A	725893175	725893810	TraesCS4A01G460900	Invertase inhibitor
4A	725910621	725911388	TraesCS4A01G461000	Leucine-rich repeat receptor-like protein kinase
4A	725925012	725925320	TraesCS4A01G461100	tRNA uridine 5-carboxymethylaminomethyl modification enzyme MnmG
4A	725938774	725943260	TraesCS4A01G461200	elongation factor family protein
4A	726072869	726082293	TraesCS4A01G461300	F-box family protein
4A	726085754	726089353	TraesCS4A01G461400	Plant invertase/pectin methylesterase inhibitor
4A	726100045	726100767	TraesCS4A01G461500	Invertase inhibitor
4A	726113365	726115891	TraesCS4A01G461600	Ribosomal protein L5
4A	726212910	726217457	TraesCS4A01G461700	NBS-LRR resistance-like protein
4A	726292670	726299735	TraesCS4A01G461800	Disease resistance protein (NBS-LRR class) family
4A	726418546	726419414	TraesCS4A01G461900	F-box like protein
4A	726430493	726432244	TraesCS4A01G462000	Cytochrome P450
4A	726436348	726440669	TraesCS4A01G462100	Ubiquitin carboxyl-terminal hydrolase family protein
4A	726442154	726444278	TraesCS4A01G462200	Pentatricopeptide repeat-containing protein
4A	726446203	726447490	TraesCS4A01G462300	Haloacid dehalogenase-like hydrolase family protein
4A	726511457	726512639	TraesCS4A01G462400	Haloacid dehalogenase-like hydrolase family protein
4A	726575977	726577442	TraesCS4A01G462500	BTB/POZ/MATH-domain protein
4A	726672051	726672275	TraesCS4A01G462600	Disease resistance protein
4A	726696046	726698163	TraesCS4A01G462700	Tryptophan synthase beta chain
4A	726717983	726720449	TraesCS4A01G462800	NBS-LRR resistance-like protein
4A	726962094	726963953	TraesCS4A01G462900	NBS-LRR disease resistance protein
4A	726963988	726966597	TraesCS4A01G463000	Disease resistance protein RPM1
4A	726978905	726980444	TraesCS4A01G463100	ATP-dependent RNA helicase
4A	727049189	727056858	TraesCS4A01G463200	Eukaryotic initiation factor 4a
4A	727114259	727119033	TraesCS4A01G463300	ATP-dependent zinc metalloprotease FtsH
4A	727127710	727128938	TraesCS4A01G463400	O-methyltransferase-like protein
4A	727190173	727190709	TraesCS4A01G463500	O-methyltransferase family protein
4A	727268827	727270724	TraesCS4A01G463600	Cytochrome P450
4A	727745837	727746292	TraesCS4A01G463800	RING finger family protein
4A	727841214	727842200	TraesCS4A01G463900	RING finger protein
4A	728084341	728084961	TraesCS4A01G464000	Invertase inhibitor
4A	728085359	728087543	TraesCS4A01G464100	WAT1-related protein
4A	728088165	728090116	TraesCS4A01G464200	WAT1-related protein
4A	728129458	728129982	TraesCS4A01G464300	RING finger family protein
4A	728351888	728353075	TraesCS4A01G464400	F-box protein
4A	728427690	728431426	TraesCS4A01G464500	NBS-LRR-like resistance protein
4A	728442353	728443552	TraesCS4A01G464600	F-box protein
4A	728456503	728458083	TraesCS4A01G464700	Protein kinase family protein
4A	728498681	728503800	TraesCS4A01G464800	Disease resistance protein (NBS-LRR class) family
4A	728506544	728511007	TraesCS4A01G464900	Disease resistance protein (NBS-LRR class) family
4A	728518355	728524136	TraesCS4A01G465000	Receptor-like kinase TMK4
4A	728553013	728554313	TraesCS4A01G465100	F-box protein
4A	728727940	728728955	TraesCS4A01G465200	BTB/POZ and MATH domain-containing protein 2
4A	728822295	728833345	TraesCS4A01G465300	receptor kinase 1
4A	728941935	728942372	TraesCS4A01G465400	RING finger protein
4A	729056667	729057863	TraesCS4A01G465500	F-box protein
4A	729085108	729094603	TraesCS4A01G465600	Protein kinase family protein
4A	729114056	729115132	TraesCS4A01G465700	BTB/POZ and MATH domain-containing protein 2
4A	729119991	729122925	TraesCS4A01G465800	Lectin-like protein kinase
4A	729138876	729142814	TraesCS4A01G465900	Protein kinase family protein
4A	729147880	729150702	TraesCS4A01G466000	disease resistance family protein / LRR family protein
4A	729152542	729153351	TraesCS4A01G466100	Lectin-like protein kinase
4A	729157302	729158504	TraesCS4A01G466200	F-box protein
4A	729223793	729225656	TraesCS4A01G466300	Protein MID1-COMPLEMENTING ACTIVITY 1
4A	729236778	729237923	TraesCS4A01G466400	F-box protein
4A	729276576	729280308	TraesCS4A01G466500	Disease resistance protein (TIR-NBS-LRR class) family
4A	729309747	729313167	TraesCS4A01G466600	Protein kinase
4A	729476085	729477069	TraesCS4A01G466700	GAI-like protein 1
4A	729532608	729534169	TraesCS4A01G466800	Protein kinase family protein
4A	729543908	729544465	TraesCS4A01G466900	CAI-1 autoinducer sensor kinase/phosphatase cqsS isoform 1
4A	729629484	729632289	TraesCS4A01G467000	Disease resistance protein (NBS-LRR class) family
4A	729632513	729633448	TraesCS4A01G467100	MYB transcription factor
4A	729636900	729639882	TraesCS4A01G467200	Disease resistance protein (NBS-LRR class) family
4A	729654496	729655305	TraesCS4A01G467300	Lectin-like protein kinase
4A	729677992	729679038	TraesCS4A01G467400	F-box protein
4A	729681028	729683209	TraesCS4A01G467500	Protein kinase family protein
4A	729683455	729687244	TraesCS4A01G467600	Disease resistance protein RPM1
4A	729702536	729708941	TraesCS4A01G467700	Protein kinase family protein
4A	729742484	729748050	TraesCS4A01G467800	receptor kinase 2
4A	729819252	729820433	TraesCS4A01G467900	F-box protein
4A	729860110	729863845	TraesCS4A01G468000	NBS-LRR-like resistance protein
4A	730003066	730004544	TraesCS4A01G468200	F-box protein
4A	730111726	730114199	TraesCS4A01G468300	disease resistance family protein / LRR family protein
4A	730279800	730281363	TraesCS4A01G468400	Benzyl alcohol O-benzoyltransferase
4A	730490314	730491363	TraesCS4A01G468500	Protein kinase
4A	730498317	730498777	TraesCS4A01G468600	RING finger family protein
4A	730621122	730623179	TraesCS4A01G468700	Lectin receptor kinase
4A	730785364	730786910	TraesCS4A01G468800	Benzyl alcohol O-benzoyltransferase
4A	730886685	730888249	TraesCS4A01G468900	Benzyl alcohol O-benzoyltransferase
4A	731060567	731060905	TraesCS4A01G469200	Rust resistance-like protein RP1
4A	731089597	731095105	TraesCS4A01G469300	Receptor-like protein kinase
4A	731097652	731098851	TraesCS4A01G469400	F-box protein
4A	731237935	731239296	TraesCS4A01G469500	Aspartic proteinase nepenthesin-1
4A	731254981	731256570	TraesCS4A01G469600	Aspartic proteinase nepenthesin-1
4A	731304321	731306232	TraesCS4A01G469700	Cytochrome P450 family protein, expressed
4A	731310748	731311605	TraesCS4A01G469800	Glutathione S-transferase
4A	731338027	731340484	TraesCS4A01G469900	Homeobox BEL1-like protein
4A	731348581	731352640	TraesCS4A01G470000	Fiber protein Fb34
4A	731353311	731354433	TraesCS4A01G470100	Expansin-like protein
4A	731380500	731381569	TraesCS4A01G470200	Glycosyltransferase
4A	731384449	731385354	TraesCS4A01G470300	carbohydrate esterase, putative (DUF303)
4A	731387853	731388455	TraesCS4A01G470400	carbohydrate esterase, putative (DUF303)
4A	731397493	731400686	TraesCS4A01G470500	Regulatory protein NPR1
4A	731406260	731411516	TraesCS4A01G470600	Disease resistance protein (NBS-LRR class) family
4A	731489658	731490604	TraesCS4A01G470700	carbohydrate esterase, putative (DUF303)
4A	731600609	731616777	TraesCS4A01G470800	NBS-LRR-like resistance protein
4A	731619002	731619373	TraesCS4A01G470900	DnaJ/Hsp40 cysteine-rich domain superfamily protein
4A	731635600	731637054	TraesCS4A01G471000	Structural maintenance of chromosomes protein
4A	731692976	731698895	TraesCS4A01G471100	NBS-LRR disease resistance protein
4A	731749894	731761183	TraesCS4A01G471200	NBS-LRR-like resistance protein
4A	731770488	731774278	TraesCS4A01G471300	NBS-LRR-like resistance protein
4A	731850021	731851331	TraesCS4A01G471400	Disease resistance protein (NBS-LRR class) family
4A	732004255	732005637	TraesCS4A01G471500	Aspartic proteinase nepenthesin
4A	732070551	732070847	TraesCS4A01G471600	50S ribosomal protein L18
4A	732106056	732108050	TraesCS4A01G471700	Disease resistance protein (NBS-LRR class) family
4A	732267353	732267691	TraesCS4A01G471800	B3 domain-containing protein REM17
4A	732354894	732355298	TraesCS4A01G471900	Disease resistance protein
4A	732355489	732358287	TraesCS4A01G472000	NBS-LRR-like resistance protein
4A	732511718	732513094	TraesCS4A01G472100	Kelch repeat-containing protein
4A	732515640	732517344	TraesCS4A01G472200	50S ribosomal protein L6
4A	732517419	732521895	TraesCS4A01G472300	TSL-kinase interacting protein 1
4A	732769923	732771320	TraesCS4A01G472400	WAT1-related protein
4A	732771919	732774248	TraesCS4A01G472500	Ferredoxin--NADP reductase
4A	732778944	732780700	TraesCS4A01G472600	SKP1-like protein
4A	732788749	732789402	TraesCS4A01G472700	B3 domain-containing protein
4A	732813584	732814948	TraesCS4A01G472800	Aspartic proteinase nepenthesin-1
4A	732919817	732920113	TraesCS4A01G472900	Aspartate carbamoyltransferase
4A	732959545	732977556	TraesCS4A01G473000	Alpha-ketoglutarate-dependent sulfate ester dioxygenase
4A	733118532	733118772	TraesCS4A01G473100	cyclin delta-3
4A	733388562	733390031	TraesCS4A01G473200	Chaperone protein DnaK
4A	733420749	733423532	TraesCS4A01G473300	Leucine-rich receptor-like protein kinase family protein
4A	733430875	733433950	TraesCS4A01G473400	Protein CWC15 like
4A	733558732	733560366	TraesCS4A01G473500	Hydroxycinnamoyl-CoA shikimate/quinate hydroxycinnamoyltransferase
[truncated: 259 more rows]
